# Supplementary material for: Cas9+ conditionally immortalized neutrophil progenitors as a tool for genome wide CRISPR screening for neutrophil differentiation and function
Source: bioRxiv preprint, doi:10.1101/2022.07.19.500665, version 1 (2022-07-20)
Supplement: Table S1 [file 500665_file02.xlsx]

## Sheet: Sheet1
Gene.stable.ID	Gene.name	logFC	AveExpr	P.Value	adj.P.Val
ENSMUSG00000016494	Cd34	-6.92169	7.59577	7.14348e-25	7.5028e-21
ENSMUSG00000020101	Vsir	4.49787	6.94398	4.72113e-23	2.16732e-19
ENSMUSG00000071713	Csf2rb	3.47469	8.53624	6.19059e-23	2.16732e-19
ENSMUSG00000058099	Nfam1	3.58762	7.56717	1.02621e-22	2.61955e-19
ENSMUSG00000027508	Pag1	3.90427	6.28966	1.24705e-22	2.61955e-19
ENSMUSG00000004665	Cnn2	2.92374	7.82421	2.20738e-22	3.86402e-19
ENSMUSG00000049313	Sorl1	5.20641	6.7114	3.07213e-22	4.11784e-19
ENSMUSG00000039167	Adgrl4	-5.54374	5.9912	3.4445e-22	4.11784e-19
ENSMUSG00000003134	Tbc1d8	5.51814	5.08938	3.52856e-22	4.11784e-19
ENSMUSG00000069516	Lyz2	5.99531	8.56956	4.18606e-22	4.39661e-19
ENSMUSG00000026822	Lcn2	8.30983	7.10652	6.75131e-22	6.44627e-19
ENSMUSG00000028042	Zbtb7b	3.36002	6.42332	9.25703e-22	6.71447e-19
ENSMUSG00000019726	Lyst	3.96101	7.76419	9.76465e-22	6.71447e-19
ENSMUSG00000015143	Actn1	3.25461	7.30282	9.9574e-22	6.71447e-19
ENSMUSG00000034165	Ccnd3	2.50963	8.14984	1.01216e-21	6.71447e-19
ENSMUSG00000074272	Ceacam1	4.7164	6.91265	1.02286e-21	6.71447e-19
ENSMUSG00000001156	Mxd1	4.99864	6.58567	1.40972e-21	8.70958e-19
ENSMUSG00000020846	Rflnb	6.01389	4.8899	2.09419e-21	1.22196e-18
ENSMUSG00000015950	Ncf1	3.22025	9.32396	2.32634e-21	1.22569e-18
ENSMUSG00000037902	Sirpa	2.89669	7.5875	2.33399e-21	1.22569e-18
ENSMUSG00000024300	Myo1f	2.648	8.25279	3.85942e-21	1.93026e-18
ENSMUSG00000027562	Car2	-4.10861	6.13578	4.44111e-21	2.12023e-18
ENSMUSG00000096054	Syne1	5.78356	6.88584	4.87225e-21	2.22492e-18
ENSMUSG00000032540	Abhd5	4.03486	6.6118	5.27311e-21	2.30751e-18
ENSMUSG00000039270	Megf9	3.27377	7.27188	5.49251e-21	2.30751e-18
ENSMUSG00000028159	Dapp1	-2.46561	7.40941	7.80134e-21	3.14578e-18
ENSMUSG00000037946	Fgd3	2.97764	6.00303	8.29397e-21	3.14578e-18
ENSMUSG00000061981	Flot2	4.18963	5.21928	8.38636e-21	3.14578e-18
ENSMUSG00000053310	Nrgn	-6.5965	5.17407	9.11117e-21	3.29981e-18
ENSMUSG00000030474	Siglece	6.94442	3.98433	1.26518e-20	4.4294e-18
ENSMUSG00000031785	Adgrg1	-5.24615	7.31262	1.52955e-20	5.10104e-18
ENSMUSG00000031722	Hp	5.21847	7.42397	1.55416e-20	5.10104e-18
ENSMUSG00000030403	Vasp	2.10947	7.8707	1.60665e-20	5.11354e-18
ENSMUSG00000046841	Ckap4	5.01362	5.95648	1.81788e-20	5.61566e-18
ENSMUSG00000021866	Anxa11	2.86367	7.25639	2.5398e-20	7.62159e-18
ENSMUSG00000028859	Csf3r	2.75492	7.44016	2.84484e-20	8.29983e-18
ENSMUSG00000030413	Pglyrp1	3.76671	7.4084	3.20267e-20	9.09126e-18
ENSMUSG00000025236	Adpgk	3.55741	7.54217	3.31173e-20	9.15346e-18
ENSMUSG00000018796	Acsl1	2.59716	7.37973	3.70559e-20	9.73855e-18
ENSMUSG00000031389	Arhgap4	2.17292	6.90322	3.70887e-20	9.73855e-18
ENSMUSG00000019066	Rab3d	2.81338	6.54593	3.81382e-20	9.76988e-18
ENSMUSG00000054676	1600014C10Rik	2.48838	6.22615	3.96235e-20	9.9087e-18
ENSMUSG00000020253	Ppm1m	3.2043	5.84897	4.87756e-20	1.19137e-17
ENSMUSG00000022555	Dgat1	3.78383	6.32954	5.25191e-20	1.25365e-17
ENSMUSG00000071715	Ncf4	2.40039	7.69302	5.88094e-20	1.37261e-17
ENSMUSG00000043740	B430306N03Rik	5.96006	4.79744	6.30115e-20	1.41286e-17
ENSMUSG00000038375	Trp53inp2	5.60581	4.97456	6.32242e-20	1.41286e-17
ENSMUSG00000002885	Adgre5	2.49804	7.1656	6.62988e-20	1.4507e-17
ENSMUSG00000026020	Nop58	-2.41908	7.58772	8.27516e-20	1.77376e-17
ENSMUSG00000075370	Igll1	-3.34753	6.41296	9.45161e-20	1.95954e-17
ENSMUSG00000031400	G6pdx	3.55048	8.64779	9.51503e-20	1.95954e-17
ENSMUSG00000030786	Itgam	5.62628	5.67958	1.17494e-19	2.37315e-17
ENSMUSG00000002963	Pnkp	2.76755	7.09318	1.24284e-19	2.42204e-17
ENSMUSG00000049625	Tifab	-3.94808	5.5524	1.24526e-19	2.42204e-17
ENSMUSG00000031827	Cotl1	2.58481	8.32952	1.84305e-19	3.45918e-17
ENSMUSG00000029086	Prom1	4.68186	5.05601	1.84437e-19	3.45918e-17
ENSMUSG00000068747	Sort1	2.50524	7.95118	2.00675e-19	3.6977e-17
ENSMUSG00000028874	Fgr	6.28267	4.93082	2.06939e-19	3.74739e-17
ENSMUSG00000026853	Crat	2.982	6.03323	2.2079e-19	3.93043e-17
ENSMUSG00000030748	Il4ra	3.67191	6.17682	2.35725e-19	4.12637e-17
ENSMUSG00000021823	Vcl	2.24856	7.10722	2.40963e-19	4.12785e-17
ENSMUSG00000029915	Clec5a	4.30417	7.03085	2.4367e-19	4.12785e-17
ENSMUSG00000042354	Gnl3	-3.56468	6.64546	2.67664e-19	4.46234e-17
ENSMUSG00000030774	Pak1	2.0298	7.05803	2.89374e-19	4.74575e-17
ENSMUSG00000029860	Zyx	2.10174	7.45167	2.93701e-19	4.74575e-17
ENSMUSG00000053931	Cnn3	-4.2678	5.74711	3.15852e-19	5.02636e-17
ENSMUSG00000040723	Rcsd1	2.01361	7.53842	3.25302e-19	5.06591e-17
ENSMUSG00000030148	Clec4a2	4.59519	5.0093	3.3229e-19	5.06591e-17
ENSMUSG00000024164	C3	5.14655	8.40033	3.32807e-19	5.06591e-17
ENSMUSG00000019982	Myb	-2.4498	8.8417	3.46311e-19	5.19615e-17
ENSMUSG00000038366	Lasp1	2.49743	7.9696	3.58151e-19	5.27594e-17
ENSMUSG00000030747	Dgat2	3.94395	6.37789	3.61675e-19	5.27594e-17
ENSMUSG00000032202	Rab27a	2.30798	7.59114	3.71421e-19	5.34388e-17
ENSMUSG00000024451	Arap3	2.63785	5.94093	4.1661e-19	5.91305e-17
ENSMUSG00000003949	Hlf	-3.17813	6.62718	4.28155e-19	5.99589e-17
ENSMUSG00000032109	Nlrx1	3.01228	5.0955	4.37255e-19	6.02233e-17
ENSMUSG00000035673	Sbno2	2.33748	7.01773	4.41512e-19	6.02233e-17
ENSMUSG00000030942	Thumpd1	-2.28966	6.12546	5.00689e-19	6.74197e-17
ENSMUSG00000014077	Chp1	1.98861	7.29634	5.30061e-19	6.96739e-17
ENSMUSG00000037172	Dennd11	2.51066	5.97659	5.30697e-19	6.96739e-17
ENSMUSG00000023150	Ivns1abp	-1.7555	8.17331	5.89971e-19	7.64995e-17
ENSMUSG00000004668	Abca13	5.29609	5.84475	6.17413e-19	7.90816e-17
ENSMUSG00000039960	Rhou	4.2255	4.8566	6.4688e-19	8.18576e-17
ENSMUSG00000059743	Fdps	3.20559	4.53209	6.55079e-19	8.19083e-17
ENSMUSG00000028064	Sema4a	2.09275	7.00747	7.26674e-19	8.97913e-17
ENSMUSG00000026970	Rbms1	2.6489	6.847	7.59286e-19	9.273e-17
ENSMUSG00000031146	Plp2	2.7605	7.3607	7.83329e-19	9.35601e-17
ENSMUSG00000031328	Flna	2.07937	10.5823	7.9074e-19	9.35601e-17
ENSMUSG00000034312	Iqsec1	3.16243	6.7618	7.96791e-19	9.35601e-17
ENSMUSG00000008730	Hipk1	2.68402	8.0808	8.01714e-19	9.35601e-17
ENSMUSG00000000290	Itgb2	4.108	8.31088	1.0154e-18	1.17195e-16
ENSMUSG00000022973	Synj1	2.0924	6.52496	1.12118e-18	1.27997e-16
ENSMUSG00000024942	Capn1	2.45782	6.84209	1.13772e-18	1.28489e-16
ENSMUSG00000018983	E2f2	5.3991	5.86858	1.24555e-18	1.39171e-16
ENSMUSG00000027330	Cdc25b	2.07218	5.93504	1.27394e-18	1.40845e-16
ENSMUSG00000029580	Actb	2.145	10.4635	1.29355e-18	1.41135e-16
ENSMUSG00000025429	Pstpip2	3.4868	5.91267	1.30344e-18	1.41135e-16
ENSMUSG00000016194	Hsd11b1	3.92562	6.34963	1.36688e-18	1.46494e-16
ENSMUSG00000042759	Apobr	2.51302	6.79531	1.38797e-18	1.47251e-16
ENSMUSG00000025085	Ablim1	-4.52437	5.7174	1.42782e-18	1.49964e-16
ENSMUSG00000034595	Ppp1r18	1.95012	7.26317	1.44705e-18	1.50479e-16
ENSMUSG00000038145	Snrk	2.63291	5.3101	1.48026e-18	1.52423e-16
ENSMUSG00000044447	Dock5	2.15784	7.55363	1.59117e-18	1.62236e-16
ENSMUSG00000033147	Slc22a15	4.66232	4.16808	1.60645e-18	1.62236e-16
ENSMUSG00000025795	Rassf3	3.72445	4.67654	1.69899e-18	1.69948e-16
ENSMUSG00000064065	Ipcef1	3.526	5.71421	1.7164e-18	1.7007e-16
ENSMUSG00000016024	Lbp	3.16892	6.69204	1.85923e-18	1.80078e-16
ENSMUSG00000028228	Cpne3	2.72324	6.98716	1.85942e-18	1.80078e-16
ENSMUSG00000021224	Numb	2.58562	6.15177	1.86885e-18	1.80078e-16
ENSMUSG00000059316	Slc27a4	3.66906	5.91516	1.90228e-18	1.81633e-16
ENSMUSG00000026519	Tmem63a	2.62649	5.96941	1.96501e-18	1.85932e-16
ENSMUSG00000044199	S1pr4	2.63021	5.0892	2.02174e-18	1.89592e-16
ENSMUSG00000029007	Agtrap	2.09538	6.86889	2.08308e-18	1.93481e-16
ENSMUSG00000048924	Ccdc125	2.99346	5.04518	2.10005e-18	1.93481e-16
ENSMUSG00000022822	Abcc5	2.79209	6.02268	2.16815e-18	1.98018e-16
ENSMUSG00000079481	Nhsl2	3.10084	6.51777	2.24409e-18	2.03187e-16
ENSMUSG00000034247	Plekhm1	2.28608	5.62475	2.71671e-18	2.41891e-16
ENSMUSG00000005846	Rsl1d1	-2.22313	7.45104	2.71761e-18	2.41891e-16
ENSMUSG00000033066	Gas7	3.99469	6.07461	2.74316e-18	2.42113e-16
ENSMUSG00000050721	Plekho2	1.91505	6.75683	2.77934e-18	2.4222e-16
ENSMUSG00000001054	Rmnd5b	2.16865	5.54589	2.7946e-18	2.4222e-16
ENSMUSG00000036273	Lrrk2	3.62962	6.02421	2.81356e-18	2.4222e-16
ENSMUSG00000032786	Alas1	2.51901	8.38384	2.92391e-18	2.49673e-16
ENSMUSG00000015027	Galns	1.90491	6.00221	3.01598e-18	2.55444e-16
ENSMUSG00000050931	Sgms2	3.24283	5.78746	3.04013e-18	2.55444e-16
ENSMUSG00000046006	Gapt	2.63393	5.56658	3.07903e-18	2.56659e-16
ENSMUSG00000053641	Dennd4a	1.9405	6.86152	3.16166e-18	2.61472e-16
ENSMUSG00000006519	Cyba	2.30322	7.64505	3.30697e-18	2.70102e-16
ENSMUSG00000022443	Myh9	1.92917	10.5303	3.34129e-18	2.70102e-16
ENSMUSG00000071714	Csf2rb2	4.48155	6.21506	3.35655e-18	2.70102e-16
ENSMUSG00000024151	Msh2	-2.06828	6.47136	3.36889e-18	2.70102e-16
ENSMUSG00000015312	Gadd45b	3.17551	4.45128	3.55876e-18	2.83164e-16
ENSMUSG00000063065	Mapk3	2.45296	7.50333	3.69963e-18	2.92159e-16
ENSMUSG00000059326	Csf2ra	2.52515	6.47151	3.72865e-18	2.92254e-16
ENSMUSG00000001441	Npepps	1.75276	7.68263	4.02746e-18	3.116e-16
ENSMUSG00000029178	Klf3	2.7881	5.38715	4.03481e-18	3.116e-16
ENSMUSG00000007038	Neu1	2.49894	6.96848	4.18514e-18	3.18968e-16
ENSMUSG00000024359	Hspa9	-1.92267	8.77936	4.19096e-18	3.18968e-16
ENSMUSG00000036693	Nop14	-2.0318	6.05214	4.32341e-18	3.2605e-16
ENSMUSG00000044465	Fhip1b	2.73799	6.47744	4.34609e-18	3.2605e-16
ENSMUSG00000052435	Cebpe	2.92935	6.61105	4.66586e-18	3.47557e-16
ENSMUSG00000021281	Tnfaip2	3.23266	6.88742	4.91649e-18	3.63647e-16
ENSMUSG00000040447	Spns2	-4.73225	5.19017	4.95976e-18	3.64282e-16
ENSMUSG00000005981	Trap1	-2.03674	7.22554	5.10668e-18	3.72468e-16
ENSMUSG00000027405	Nop56	-2.27987	7.80177	5.56889e-18	4.03379e-16
ENSMUSG00000105652	4930519L02Rik	-3.60826	5.06271	5.68966e-18	4.06524e-16
ENSMUSG00000004040	Stat3	1.77621	7.81643	5.68972e-18	4.06524e-16
ENSMUSG00000021133	Susd6	2.12374	6.26305	5.98226e-18	4.24539e-16
ENSMUSG00000019979	Apaf1	1.54468	7.4872	6.11094e-18	4.3076e-16
ENSMUSG00000031403	Dkc1	-2.89688	7.00773	6.29884e-18	4.38999e-16
ENSMUSG00000020841	Cpd	2.26204	7.68664	6.31142e-18	4.38999e-16
ENSMUSG00000064267	Hvcn1	3.39675	7.12818	6.80066e-18	4.69917e-16
ENSMUSG00000021998	Lcp1	1.58927	10.5713	7.32812e-18	5.03054e-16
ENSMUSG00000025026	Add3	2.07815	7.00101	7.65047e-18	5.18454e-16
ENSMUSG00000047767	Atg16l2	2.68099	4.15508	7.65119e-18	5.18454e-16
ENSMUSG00000027478	Dnmt3b	-4.61222	4.40388	7.75887e-18	5.22015e-16
ENSMUSG00000033538	Casp4	4.56853	3.73896	7.80314e-18	5.22015e-16
ENSMUSG00000025648	Pfkfb4	4.29125	5.63589	8.04549e-18	5.3418e-16
ENSMUSG00000015889	Lta4h	1.92174	8.94305	8.0867e-18	5.3418e-16
ENSMUSG00000058624	Gda	2.66788	9.1531	8.19241e-18	5.3778e-16
ENSMUSG00000000711	Rab5b	2.10665	6.55808	8.79051e-18	5.73458e-16
ENSMUSG00000027778	Ift80	1.88591	5.68097	9.04074e-18	5.86142e-16
ENSMUSG00000052889	Prkcb	3.00906	5.99935	9.12329e-18	5.87864e-16
ENSMUSG00000033400	Agl	3.32632	6.86397	9.39099e-18	6.01424e-16
ENSMUSG00000024858	Grk2	1.43093	8.4731	9.92771e-18	6.31944e-16
ENSMUSG00000003206	Ebi3	3.66197	4.48977	1.02634e-17	6.49377e-16
ENSMUSG00000025017	Pik3ap1	2.20569	6.72352	1.03645e-17	6.51849e-16
ENSMUSG00000030341	Tnfrsf1a	2.26643	6.85696	1.07841e-17	6.74199e-16
ENSMUSG00000038807	Rap1gap2	5.87986	3.93562	1.15963e-17	7.20688e-16
ENSMUSG00000023110	Prmt5	-2.59269	6.57965	1.24219e-17	7.67455e-16
ENSMUSG00000022564	Grina	3.90078	6.75151	1.26802e-17	7.78828e-16
ENSMUSG00000070031	Sp140	2.84433	7.28012	1.38278e-17	8.44381e-16
ENSMUSG00000002111	Spi1	2.17548	7.8357	1.44502e-17	8.75245e-16
ENSMUSG00000031447	Lamp1	1.62903	8.81694	1.44999e-17	8.75245e-16
ENSMUSG00000030876	Mettl9	2.06215	7.4931	1.52761e-17	9.16826e-16
ENSMUSG00000026483	Niban1	2.83271	7.12128	1.58185e-17	9.43986e-16
ENSMUSG00000028656	Cap1	2.13875	9.2168	1.60066e-17	9.49817e-16
ENSMUSG00000022964	Tmem50b	2.54439	6.84453	1.6318e-17	9.62856e-16
ENSMUSG00000033478	Fhip2a	1.55257	6.31838	1.6899e-17	9.91567e-16
ENSMUSG00000020547	Bzw2	-3.15709	6.65605	1.72467e-17	1.00635e-15
ENSMUSG00000022831	Hcls1	1.72767	8.00979	1.77313e-17	1.01838e-15
ENSMUSG00000031004	Mki67	1.87859	10.5075	1.77381e-17	1.01838e-15
ENSMUSG00000046805	Mpeg1	3.64014	5.48181	1.77438e-17	1.01838e-15
ENSMUSG00000041268	Dmxl2	6.50712	3.91954	1.79302e-17	1.02348e-15
ENSMUSG00000029106	Add1	1.63157	7.54926	1.81656e-17	1.03029e-15
ENSMUSG00000030880	Polr3e	-2.73667	5.16242	1.82456e-17	1.03029e-15
ENSMUSG00000036006	Ripor2	1.95871	6.49588	1.85707e-17	1.03773e-15
ENSMUSG00000020806	Rhbdf2	2.95419	4.79715	1.86454e-17	1.03773e-15
ENSMUSG00000041057	Wdr43	-2.58981	6.95444	1.86739e-17	1.03773e-15
ENSMUSG00000038527	C1rl	4.57575	3.88899	1.94267e-17	1.07389e-15
ENSMUSG00000027540	Ptpn1	1.75458	6.92342	1.96984e-17	1.07999e-15
ENSMUSG00000021171	Esyt2	1.75267	6.84928	1.97427e-17	1.07999e-15
ENSMUSG00000024937	Ehbp1l1	1.92498	7.27668	1.98676e-17	1.08066e-15
ENSMUSG00000022565	Plec	2.53665	6.49549	2.00206e-17	1.08066e-15
ENSMUSG00000027907	S100a11	2.3196	7.68512	2.00637e-17	1.08066e-15
ENSMUSG00000008475	Arpc5	1.68514	8.58717	2.02041e-17	1.08267e-15
ENSMUSG00000034789	Rab24	2.10307	6.51019	2.09244e-17	1.10816e-15
ENSMUSG00000013160	Atp6v0d1	1.56036	7.42767	2.09986e-17	1.10816e-15
ENSMUSG00000003644	Rps6ka1	1.85078	8.56869	2.10692e-17	1.10816e-15
ENSMUSG00000034786	Gpsm3	2.60356	5.71024	2.11018e-17	1.10816e-15
ENSMUSG00000100147	1700047M11Rik	10.9287	-1.09744	2.12198e-17	1.10882e-15
ENSMUSG00000019122	Ccl9	-4.6837	7.62628	2.20734e-17	1.14771e-15
ENSMUSG00000003123	Lipe	2.37022	4.73036	2.32511e-17	1.20298e-15
ENSMUSG00000021665	Hexb	1.91876	6.73274	2.34409e-17	1.20686e-15
ENSMUSG00000055805	Fmnl1	1.92097	7.92154	2.37696e-17	1.21781e-15
ENSMUSG00000074604	Mgst2	2.52402	5.98296	2.48638e-17	1.26769e-15
ENSMUSG00000004266	Ptpn6	2.10777	8.5103	2.54569e-17	1.28356e-15
ENSMUSG00000019564	Arid3a	2.5768	7.39868	2.54895e-17	1.28356e-15
ENSMUSG00000022540	Rogdi	2.53271	5.22223	2.55417e-17	1.28356e-15
ENSMUSG00000021595	Nsun2	-2.19562	7.74875	2.60235e-17	1.29364e-15
ENSMUSG00000028480	Glipr2	5.01488	5.4786	2.60599e-17	1.29364e-15
ENSMUSG00000116957	Gm34680	5.39506	4.03677	2.61117e-17	1.29364e-15
ENSMUSG00000069895	Atxn1l	1.49349	6.42489	2.66544e-17	1.31432e-15
ENSMUSG00000053332	Gas5	-1.98379	7.41933	2.68595e-17	1.31825e-15
ENSMUSG00000031402	Mpp1	2.70749	7.42074	2.89901e-17	1.4162e-15
ENSMUSG00000022508	Bcl6	5.28363	3.57719	2.91403e-17	1.41695e-15
ENSMUSG00000024772	Ehd1	1.63345	6.62426	2.99933e-17	1.4517e-15
ENSMUSG00000028088	Fmo5	4.91093	3.56464	3.04827e-17	1.46862e-15
ENSMUSG00000034341	Wbp2	1.76281	7.00147	3.072e-17	1.4733e-15
ENSMUSG00000032462	Pik3cb	2.22066	6.80189	3.3246e-17	1.58719e-15
ENSMUSG00000017697	Ada	2.84524	5.525	3.36391e-17	1.59228e-15
ENSMUSG00000038497	Tmco3	2.11574	4.61191	3.36558e-17	1.59228e-15
ENSMUSG00000035781	R3hdm4	1.60415	7.10487	3.47656e-17	1.63045e-15
ENSMUSG00000060216	Arrb2	2.63836	7.7751	3.47729e-17	1.63045e-15
ENSMUSG00000001891	Ugp2	1.97449	6.71248	3.50167e-17	1.63458e-15
ENSMUSG00000041187	Prkd2	1.86096	5.65923	3.53502e-17	1.64285e-15
ENSMUSG00000000915	Hip1r	3.12505	5.16061	3.58851e-17	1.66036e-15
ENSMUSG00000085156	Snhg15	-3.54994	4.091	3.67486e-17	1.69285e-15
ENSMUSG00000056758	Hmga2	-5.90911	4.68383	3.75696e-17	1.72296e-15
ENSMUSG00000019832	Rab32	1.82872	6.61534	3.78006e-17	1.72296e-15
ENSMUSG00000042292	Mrtfa	1.84957	6.54146	3.78944e-17	1.72296e-15
ENSMUSG00000004661	Arid3b	2.73186	4.02408	3.97975e-17	1.7984e-15
ENSMUSG00000033124	Atg9a	2.23863	5.48747	3.99322e-17	1.7984e-15
ENSMUSG00000032484	Ngp	10.7474	5.73052	4.00672e-17	1.7984e-15
ENSMUSG00000029528	Pxn	1.67101	8.08856	4.20704e-17	1.88028e-15
ENSMUSG00000006526	Stimate	1.74466	4.61485	4.35695e-17	1.93903e-15
ENSMUSG00000013974	Mcemp1	6.70296	4.86591	4.41715e-17	1.94657e-15
ENSMUSG00000052085	Dock8	1.68659	8.96104	4.41777e-17	1.94657e-15
ENSMUSG00000034109	Golim4	1.60613	6.84381	4.42951e-17	1.94657e-15
ENSMUSG00000038463	Olfml2b	8.07775	4.63783	4.46626e-17	1.95455e-15
ENSMUSG00000056602	Fry	3.25306	4.71257	4.56193e-17	1.98813e-15
ENSMUSG00000030505	Prmt3	-2.17423	5.11392	4.6097e-17	2.00065e-15
ENSMUSG00000066152	Slc31a2	4.49782	4.64049	4.63667e-17	2.00149e-15
ENSMUSG00000030057	Cnbp	-1.71661	8.72406	4.64974e-17	2.00149e-15
ENSMUSG00000028496	Mllt3	-3.91324	5.16228	4.73669e-17	2.03059e-15
ENSMUSG00000030536	Iqgap1	1.80242	9.53256	4.79614e-17	2.04772e-15
ENSMUSG00000096472	Cdkn2d	3.64536	5.84672	4.88308e-17	2.06824e-15
ENSMUSG00000053289	Ddx10	-2.07684	5.83833	4.8836e-17	2.06824e-15
ENSMUSG00000102051	Ly6a2	4.90671	5.76296	5.08408e-17	2.1445e-15
ENSMUSG00000028476	Reck	4.98358	2.83914	5.19562e-17	2.18278e-15
ENSMUSG00000034354	Mtmr3	1.90664	7.90502	5.30162e-17	2.21538e-15
ENSMUSG00000033220	Rac2	1.62901	9.67444	5.3154e-17	2.21538e-15
ENSMUSG00000001741	Il16	2.40316	6.79163	5.43069e-17	2.25449e-15
ENSMUSG00000039050	Osbpl2	1.72981	6.37772	5.57487e-17	2.30005e-15
ENSMUSG00000024097	Srsf7	-1.32416	8.1961	5.58423e-17	2.30005e-15
ENSMUSG00000022390	Zc3h7b	-2.2489	6.31009	5.86565e-17	2.40037e-15
ENSMUSG00000025375	Aatk	1.82914	6.11365	5.87352e-17	2.40037e-15
ENSMUSG00000039753	Fbxl5	3.29873	6.39408	6.07046e-17	2.47124e-15
ENSMUSG00000032872	Cyb5r4	1.85542	7.59639	6.11199e-17	2.47854e-15
ENSMUSG00000027247	Arhgap1	1.6463	6.75654	6.1684e-17	2.4918e-15
ENSMUSG00000005672	Kit	-2.5901	7.73018	6.34422e-17	2.54761e-15
ENSMUSG00000020111	Micu1	1.89157	6.41255	6.35507e-17	2.54761e-15
ENSMUSG00000061838	Suclg2	-2.40504	5.78902	6.48608e-17	2.59024e-15
ENSMUSG00000068587	Mgam	5.32876	6.78419	6.57835e-17	2.61714e-15
ENSMUSG00000030062	Rpn1	-1.57981	9.08056	6.79825e-17	2.69442e-15
ENSMUSG00000049076	Acap2	1.71572	7.03351	6.86552e-17	2.71085e-15
ENSMUSG00000031488	Rab11fip1	2.20273	5.20142	7.07068e-17	2.7814e-15
ENSMUSG00000032561	Acpp	4.51547	4.46536	7.14569e-17	2.80042e-15
ENSMUSG00000056498	Tmem154	6.29556	3.88733	7.24629e-17	2.82929e-15
ENSMUSG00000011179	Odc1	-2.55177	7.32864	7.32534e-17	2.84956e-15
ENSMUSG00000034271	Jdp2	2.10547	5.30875	8.12839e-17	3.15028e-15
ENSMUSG00000046908	Ltb4r1	3.1263	5.46682	8.23863e-17	3.18126e-15
ENSMUSG00000026019	Wdr12	-2.57351	6.52184	8.35187e-17	3.21317e-15
ENSMUSG00000034570	Inpp5j	3.64439	4.37735	8.50013e-17	3.24778e-15
ENSMUSG00000034210	Efcab14	1.71909	5.96583	8.50367e-17	3.24778e-15
ENSMUSG00000038604	Ripor1	-2.20869	6.64325	8.56577e-17	3.25773e-15
ENSMUSG00000020901	Pik3r5	8.14058	1.81419	8.59174e-17	3.25773e-15
ENSMUSG00000004100	Ppan	-3.33825	5.7803	8.75026e-17	3.3059e-15
ENSMUSG00000020185	E2f7	2.36448	4.60559	8.84876e-17	3.33113e-15
ENSMUSG00000026102	Inpp1	1.97661	5.49325	9.08578e-17	3.40814e-15
ENSMUSG00000000157	Itgb2l	9.60853	4.22353	9.18959e-17	3.43482e-15
ENSMUSG00000026600	Soat1	2.88687	5.91777	9.27661e-17	3.44602e-15
ENSMUSG00000030104	Edem1	1.80133	8.27168	9.2852e-17	3.44602e-15
ENSMUSG00000005800	Mmp8	6.0284	4.30917	9.35702e-17	3.46045e-15
ENSMUSG00000031216	Stard8	2.23184	4.67199	9.53786e-17	3.51495e-15
ENSMUSG00000028961	Pgd	1.49952	9.90847	9.68321e-17	3.55604e-15
ENSMUSG00000022788	Fgd4	2.66037	6.4247	9.97089e-17	3.64893e-15
ENSMUSG00000060063	Alox5ap	2.19542	7.95844	1.02043e-16	3.72136e-15
ENSMUSG00000030720	Cln3	2.17992	5.67341	1.03648e-16	3.76682e-15
ENSMUSG00000040528	Milr1	2.73098	5.97975	1.07528e-16	3.89437e-15
ENSMUSG00000004451	Ralb	1.80086	6.19433	1.1091e-16	3.99603e-15
ENSMUSG00000024885	Aldh3b1	5.31464	4.71907	1.11096e-16	3.99603e-15
ENSMUSG00000032754	Slc8b1	1.6831	6.13527	1.11859e-16	4.00973e-15
ENSMUSG00000039232	Stx11	4.49424	4.49384	1.13537e-16	4.05606e-15
ENSMUSG00000027465	Tbc1d20	2.18921	6.96057	1.15333e-16	4.10625e-15
ENSMUSG00000031584	Gsr	1.97389	8.81831	1.17786e-16	4.17585e-15
ENSMUSG00000073902	Gvin3	6.29544	4.15768	1.18083e-16	4.17585e-15
ENSMUSG00000046223	Plaur	3.81255	6.22307	1.18716e-16	4.18414e-15
ENSMUSG00000057113	Npm1	-1.73808	10.0733	1.19944e-16	4.21329e-15
ENSMUSG00000053158	Fes	1.87374	7.80864	1.21334e-16	4.2479e-15
ENSMUSG00000038212	Mfsd14b	2.23837	7.47242	1.22683e-16	4.28088e-15
ENSMUSG00000042492	Tbc1d10b	1.91296	6.77618	1.23263e-16	4.28284e-15
ENSMUSG00000022108	Itm2b	1.62732	9.7513	1.23555e-16	4.28284e-15
ENSMUSG00000007908	Hmgcll1	-3.47305	3.85261	1.25183e-16	4.31848e-15
ENSMUSG00000052396	Mogat2	3.90635	4.67641	1.25406e-16	4.31848e-15
ENSMUSG00000033088	Triobp	2.02172	6.54064	1.27643e-16	4.38115e-15
ENSMUSG00000032864	Rag2	-11.7052	1.01962	1.30934e-16	4.45599e-15
ENSMUSG00000060012	Kif13b	2.0319	5.90689	1.311e-16	4.45599e-15
ENSMUSG00000032369	Plscr1	2.6679	6.31931	1.31186e-16	4.45599e-15
ENSMUSG00000035372	1810055G02Rik	2.53199	4.51806	1.3152e-16	4.45599e-15
ENSMUSG00000035722	Abca7	1.75735	7.53593	1.35099e-16	4.56251e-15
ENSMUSG00000021236	Entpd5	1.7745	6.41407	1.35989e-16	4.57785e-15
ENSMUSG00000060090	Rp2	1.64057	6.57732	1.41524e-16	4.74897e-15
ENSMUSG00000024006	Stk38	1.45975	7.2587	1.43707e-16	4.79236e-15
ENSMUSG00000054843	Atrnl1	2.16625	5.77293	1.4373e-16	4.79236e-15
ENSMUSG00000002147	Stat6	1.78754	7.52664	1.45514e-16	4.83651e-15
ENSMUSG00000050966	Lin28a	2.83048	5.89305	1.51205e-16	4.9972e-15
ENSMUSG00000026024	Als2	-1.68034	6.95152	1.513e-16	4.9972e-15
ENSMUSG00000067851	Arfgef1	1.44793	8.38017	1.51986e-16	5.00411e-15
ENSMUSG00000026028	Trak2	1.85206	6.97515	1.55001e-16	5.08743e-15
ENSMUSG00000027339	Rassf2	2.26566	7.08984	1.55822e-16	5.09843e-15
ENSMUSG00000058818	Pirb	8.10291	4.39872	1.6053e-16	5.23617e-15
ENSMUSG00000036002	Fam214b	4.38681	3.62476	1.61275e-16	5.24261e-15
ENSMUSG00000019960	Dusp6	-4.40534	5.34422	1.61726e-16	5.24261e-15
ENSMUSG00000029415	Sdad1	-2.35903	6.165	1.64801e-16	5.32585e-15
ENSMUSG00000078945	Naip2	1.81956	6.74312	1.68178e-16	5.41831e-15
ENSMUSG00000021065	Fut8	-2.24307	7.45272	1.7047e-16	5.46866e-15
ENSMUSG00000017631	Abr	1.59814	7.28993	1.70925e-16	5.46866e-15
ENSMUSG00000025742	Prps2	-1.95713	6.042	1.71302e-16	5.46866e-15
ENSMUSG00000037949	Ano10	2.55796	6.17187	1.72142e-16	5.4788e-15
ENSMUSG00000052459	Atp6v1a	1.99029	8.38704	1.73005e-16	5.48964e-15
ENSMUSG00000044768	Macir	2.11919	5.69463	1.76261e-16	5.57612e-15
ENSMUSG00000000184	Ccnd2	-3.93341	6.1831	1.78342e-16	5.61037e-15
ENSMUSG00000032496	Ltf	14.2789	3.93406	1.78739e-16	5.61037e-15
ENSMUSG00000026626	Ppp2r5a	1.58497	8.18907	1.78946e-16	5.61037e-15
ENSMUSG00000027472	Pdrg1	-2.3228	5.22054	1.80123e-16	5.63046e-15
ENSMUSG00000052749	Trim30b	6.01021	2.93177	1.822e-16	5.67396e-15
ENSMUSG00000054342	Kcnn4	-2.58065	5.8044	1.82595e-16	5.67396e-15
ENSMUSG00000021457	Syk	1.62221	8.23445	1.83477e-16	5.68454e-15
ENSMUSG00000020075	Ddx21	-2.52674	7.74436	1.88004e-16	5.79893e-15
ENSMUSG00000045411	2410002F23Rik	-2.35518	5.17599	1.88273e-16	5.79893e-15
ENSMUSG00000049999	Ppp1r3d	4.98113	3.16959	1.90009e-16	5.83528e-15
ENSMUSG00000037095	Lrg1	7.8937	3.5859	1.91181e-16	5.85415e-15
ENSMUSG00000019731	Slc35e1	2.28429	6.86223	1.92353e-16	5.87292e-15
ENSMUSG00000074582	Arfgef2	1.68543	7.28462	1.95055e-16	5.93816e-15
ENSMUSG00000023942	Slc29a1	-2.09209	5.17524	1.96141e-16	5.95394e-15
ENSMUSG00000030890	Ilk	1.24369	7.48833	1.98184e-16	5.99864e-15
ENSMUSG00000046245	Pilra	5.78025	3.83777	2.00272e-16	6.04443e-15
ENSMUSG00000024142	Mlst8	2.04346	5.61526	2.02097e-16	6.06872e-15
ENSMUSG00000002250	Ppard	2.44923	4.70767	2.02233e-16	6.06872e-15
ENSMUSG00000059456	Ptk2b	1.55923	7.01382	2.03958e-16	6.10305e-15
ENSMUSG00000042349	Ikbke	2.1442	6.72443	2.08115e-16	6.2001e-15
ENSMUSG00000030541	Idh2	-1.80508	7.74813	2.08382e-16	6.2001e-15
ENSMUSG00000047604	Frat2	-2.69248	4.65955	2.11793e-16	6.27954e-15
ENSMUSG00000021939	Ctsb	1.89779	7.94943	2.12248e-16	6.27954e-15
ENSMUSG00000032434	Cmtm6	1.39799	6.88017	2.13415e-16	6.29634e-15
ENSMUSG00000015937	Macroh2a1	-1.48699	8.77582	2.21164e-16	6.50667e-15
ENSMUSG00000095567	Noc2l	-2.15464	7.26819	2.22958e-16	6.54114e-15
ENSMUSG00000047250	Ptgs1	1.68925	7.74778	2.24348e-16	6.56359e-15
ENSMUSG00000116564	Riok2	-1.81152	5.36591	2.31994e-16	6.76842e-15
ENSMUSG00000006373	Pgrmc1	-1.79236	6.03666	2.33925e-16	6.80585e-15
ENSMUSG00000057637	Prdm2	1.405	6.44633	2.39684e-16	6.94752e-15
ENSMUSG00000042228	Lyn	2.12264	7.25602	2.40117e-16	6.94752e-15
ENSMUSG00000024659	Anxa1	3.50711	9.88767	2.42844e-16	7.00712e-15
ENSMUSG00000020629	Adi1	-2.70539	5.76335	2.44599e-16	7.03843e-15
ENSMUSG00000032508	Myd88	2.24923	6.10601	2.46149e-16	7.06368e-15
ENSMUSG00000033985	Tesk2	3.16478	3.64424	2.48769e-16	7.11939e-15
ENSMUSG00000117763	9830166K06Rik	9.32193	-1.07582	2.56151e-16	7.31075e-15
ENSMUSG00000030589	Rasgrp4	9.20717	3.06592	2.58617e-16	7.36113e-15
ENSMUSG00000047798	Cd300lf	8.12342	4.69384	2.60328e-16	7.38751e-15
ENSMUSG00000072872	Rybp	2.07111	5.53657	2.61351e-16	7.38751e-15
ENSMUSG00000038368	Focad	-2.41764	4.62417	2.61654e-16	7.38751e-15
ENSMUSG00000061175	Fnip2	2.44238	5.87436	2.73242e-16	7.69401e-15
ENSMUSG00000025494	Sigirr	-2.03012	5.63339	2.74746e-16	7.71566e-15
ENSMUSG00000040345	Arhgap9	2.1449	6.53143	2.77082e-16	7.76051e-15
ENSMUSG00000044197	Gpr146	2.92856	4.29257	2.78477e-16	7.77884e-15
ENSMUSG00000040322	Slc25a24	2.20968	6.76284	2.90655e-16	8.09747e-15
ENSMUSG00000022824	Muc13	-3.18946	6.80575	2.97059e-16	8.25399e-15
ENSMUSG00000028603	Scp2	1.79622	7.63049	3.06074e-16	8.48206e-15
ENSMUSG00000010025	Aldh3a2	2.30936	5.75083	3.17826e-16	8.76009e-15
ENSMUSG00000052423	B4galt3	2.14723	5.49008	3.1807e-16	8.76009e-15
ENSMUSG00000031904	Slc7a6	-2.80471	5.7264	3.18609e-16	8.76009e-15
ENSMUSG00000020823	Sec14l1	1.71066	6.04107	3.20135e-16	8.77905e-15
ENSMUSG00000024197	Plin3	2.06751	7.62017	3.22596e-16	8.82352e-15
ENSMUSG00000070476	Fam217b	2.10609	4.83884	3.43082e-16	9.35946e-15
ENSMUSG00000050619	Zscan29	1.94394	5.54515	3.45302e-16	9.39561e-15
ENSMUSG00000008540	Mgst1	5.55105	4.55239	3.47714e-16	9.43679e-15
ENSMUSG00000071637	Cebpd	2.66958	5.50609	3.48723e-16	9.4398e-15
ENSMUSG00000003153	Slc2a3	4.49171	6.70536	3.52317e-16	9.51256e-15
ENSMUSG00000071562	Stfa1	9.08797	6.10968	3.54954e-16	9.55918e-15
ENSMUSG00000002458	Rgs19	1.82229	7.09326	3.5757e-16	9.60499e-15
ENSMUSG00000056724	Nbeal2	1.66182	7.61392	3.72208e-16	9.9727e-15
ENSMUSG00000020700	Map3k3	1.47862	6.41336	3.75222e-16	1.00279e-14
ENSMUSG00000024640	Psat1	-1.88305	8.80175	3.76901e-16	1.00472e-14
ENSMUSG00000027133	Nop10	-2.13637	6.42714	3.80227e-16	1.01102e-14
ENSMUSG00000024953	Prdx5	2.28499	8.34118	3.84001e-16	1.01848e-14
ENSMUSG00000032479	Map4	1.40508	6.79107	3.89866e-16	1.03143e-14
ENSMUSG00000059498	Fcgr3	2.13623	8.26478	3.9094e-16	1.03167e-14
ENSMUSG00000051748	Wfdc21	6.05281	4.74612	3.9424e-16	1.03777e-14
ENSMUSG00000050106	Tmc8	4.20233	3.40109	3.98232e-16	1.04432e-14
ENSMUSG00000022500	Litaf	2.18396	6.92269	3.98717e-16	1.04432e-14
ENSMUSG00000009621	Vav2	-2.99117	3.90191	4.05482e-16	1.0594e-14
ENSMUSG00000049553	Polr1a	-1.78593	6.64468	4.17154e-16	1.08719e-14
ENSMUSG00000050567	Maml1	1.55381	5.4666	4.23393e-16	1.09879e-14
ENSMUSG00000032562	Gnai2	1.39866	9.7544	4.23698e-16	1.09879e-14
ENSMUSG00000059714	Flot1	1.75113	6.7522	4.26453e-16	1.10321e-14
ENSMUSG00000050410	Tcf19	2.93765	5.15687	4.28212e-16	1.10504e-14
ENSMUSG00000038991	Txndc5	-2.79795	6.35291	4.35468e-16	1.12101e-14
ENSMUSG00000054792	Klhl18	1.73668	5.50769	4.41595e-16	1.134e-14
ENSMUSG00000087370	Tmem170b	2.30477	5.81346	4.51427e-16	1.15642e-14
ENSMUSG00000003848	Nob1	-2.39423	5.19982	4.71722e-16	1.20407e-14
ENSMUSG00000054855	Rnd1	3.15829	4.43173	4.72318e-16	1.20407e-14
ENSMUSG00000021948	Prkcd	1.68437	8.30909	4.75e-16	1.20754e-14
ENSMUSG00000075705	Msrb1	2.33854	8.07441	4.7598e-16	1.20754e-14
ENSMUSG00000074886	Grk6	1.43631	7.65434	4.84344e-16	1.2258e-14
ENSMUSG00000030314	Atg7	2.03868	6.22607	4.86657e-16	1.22869e-14
ENSMUSG00000069873	4930438A08Rik	5.63437	4.13924	4.8785e-16	1.22875e-14
ENSMUSG00000026113	Inpp4a	4.42774	3.8693	4.90013e-16	1.23124e-14
ENSMUSG00000025986	Slc39a10	-3.34788	4.66792	4.98251e-16	1.24896e-14
ENSMUSG00000041444	Arhgap32	-3.57481	4.35417	5.01438e-16	1.25395e-14
ENSMUSG00000024754	Cemip2	3.2502	5.87579	5.03242e-16	1.25547e-14
ENSMUSG00000057541	Pus7	-3.78057	5.27517	5.26591e-16	1.31061e-14
ENSMUSG00000001065	Zfp276	1.78102	4.89857	5.37126e-16	1.33133e-14
ENSMUSG00000021068	Nin	1.42987	9.04293	5.37539e-16	1.33133e-14
ENSMUSG00000037029	Zfp146	-2.37833	5.61554	5.38716e-16	1.33133e-14
ENSMUSG00000021843	Ktn1	-1.46987	5.81355	5.42277e-16	1.33698e-14
ENSMUSG00000039813	Tbc1d2	2.52446	5.41131	5.495e-16	1.35162e-14
ENSMUSG00000026843	Fubp3	-1.6894	5.11092	5.54122e-16	1.3598e-14
ENSMUSG00000022472	Desi1	1.49423	6.50271	5.59057e-16	1.36871e-14
ENSMUSG00000047710	Champ1	-1.79326	6.11237	5.61322e-16	1.37106e-14
ENSMUSG00000041754	Trem3	3.08887	5.60547	5.64919e-16	1.37665e-14
ENSMUSG00000051124	Gimap9	-3.02952	4.76983	5.69775e-16	1.38526e-14
ENSMUSG00000007739	Cct4	-1.36	8.36616	5.78594e-16	1.40083e-14
ENSMUSG00000035004	Igsf6	2.58296	7.67794	5.78845e-16	1.40083e-14
ENSMUSG00000041440	Gk5	2.17515	3.91859	6.03921e-16	1.45816e-14
ENSMUSG00000029810	Tmem176b	-3.71892	4.79241	6.16341e-16	1.48473e-14
ENSMUSG00000095115	Itpripl2	2.49056	6.0064	6.28275e-16	1.51002e-14
ENSMUSG00000000826	Dnajc5	1.31508	7.56691	6.41844e-16	1.53647e-14
ENSMUSG00000042082	Arsb	1.85482	7.19927	6.42208e-16	1.53647e-14
ENSMUSG00000069892	9930111J21Rik2	2.92382	4.37129	6.60804e-16	1.57737e-14
ENSMUSG00000032640	Chsy1	-1.84777	6.55163	6.71798e-16	1.59998e-14
ENSMUSG00000027423	Snx5	-1.27723	8.1643	6.80475e-16	1.61698e-14
ENSMUSG00000042870	Tom1	1.73576	5.878	6.87415e-16	1.62978e-14
ENSMUSG00000066440	Zfyve26	1.84952	6.28546	6.90924e-16	1.6336e-14
ENSMUSG00000026672	Optn	2.56638	5.37268	6.92139e-16	1.6336e-14
ENSMUSG00000026377	Nifk	-2.17539	6.21294	6.97745e-16	1.64314e-14
ENSMUSG00000035248	Tut7	1.4472	7.20682	7.16447e-16	1.68341e-14
ENSMUSG00000054400	Cklf	2.41021	5.34194	7.1988e-16	1.6877e-14
ENSMUSG00000002957	Ap2a2	1.51835	6.8493	7.2539e-16	1.69542e-14
ENSMUSG00000053398	Phgdh	-1.4782	7.66836	7.26403e-16	1.69542e-14
ENSMUSG00000039263	Npepl1	-1.88227	5.7593	7.28366e-16	1.69624e-14
ENSMUSG00000031444	F10	5.37784	6.39706	7.31465e-16	1.69968e-14
ENSMUSG00000058793	Cds2	1.68803	7.06283	7.34916e-16	1.70393e-14
ENSMUSG00000026648	Dclre1c	1.76664	5.02055	7.37318e-16	1.70574e-14
ENSMUSG00000027475	Kif3b	2.276	5.52375	7.57273e-16	1.74805e-14
ENSMUSG00000039616	Mocos	5.5074	4.12647	7.6065e-16	1.752e-14
ENSMUSG00000004626	Stxbp2	1.58113	8.22324	7.63679e-16	1.75512e-14
ENSMUSG00000039377	Hlx	3.02497	3.93934	7.66891e-16	1.75866e-14
ENSMUSG00000045636	Mtus1	2.85471	7.28936	7.69663e-16	1.76117e-14
ENSMUSG00000001029	Icam2	-1.8944	5.56952	7.72526e-16	1.76388e-14
ENSMUSG00000005949	Ctns	2.18014	4.6851	7.78879e-16	1.77453e-14
ENSMUSG00000066232	Ipo7	-1.4816	8.30327	7.88086e-16	1.79162e-14
ENSMUSG00000031337	Mtm1	2.0818	5.10955	7.90057e-16	1.79222e-14
ENSMUSG00000019998	Stx7	1.4751	6.59022	8.24414e-16	1.86612e-14
ENSMUSG00000086425	F730016J06Rik	6.47769	4.31761	8.5569e-16	1.93275e-14
ENSMUSG00000051495	Irf2bp2	1.23544	7.03209	8.63282e-16	1.94572e-14
ENSMUSG00000029304	Spp1	4.28223	5.19213	8.77658e-16	1.97388e-14
ENSMUSG00000046410	Kcnk6	2.01138	4.94421	9.12989e-16	2.04896e-14
ENSMUSG00000093904	Tomm20	-1.29705	7.06174	9.46685e-16	2.12005e-14
ENSMUSG00000026915	Strbp	-1.2342	6.25045	9.58868e-16	2.14276e-14
ENSMUSG00000025357	Dgka	2.2227	5.08342	9.88594e-16	2.2045e-14
ENSMUSG00000026457	Adipor1	1.4027	7.9181	9.94995e-16	2.21407e-14
ENSMUSG00000021023	Prorp	-2.14979	4.54086	9.99824e-16	2.22012e-14
ENSMUSG00000043445	Pgp	1.40143	6.71999	1.00367e-15	2.22396e-14
ENSMUSG00000041736	Tspo	2.14466	7.07421	1.01202e-15	2.23773e-14
ENSMUSG00000020272	Stk10	1.50385	7.27445	1.01704e-15	2.24411e-14
ENSMUSG00000039985	Sinhcaf	-2.32564	5.07238	1.02013e-15	2.24621e-14
ENSMUSG00000052609	Plekhg3	1.24047	5.9788	1.02457e-15	2.25127e-14
ENSMUSG00000054520	Sh3bp2	2.49197	5.25103	1.04842e-15	2.29886e-14
ENSMUSG00000032350	Gclc	-1.6528	6.00156	1.06559e-15	2.32945e-14
ENSMUSG00000024725	Ostf1	1.88349	7.8374	1.0668e-15	2.32945e-14
ENSMUSG00000033684	Qsox1	3.27943	5.72913	1.07175e-15	2.3354e-14
ENSMUSG00000038970	Lmtk2	2.553	5.8893	1.08567e-15	2.36083e-14
ENSMUSG00000031442	Mcf2l	2.5395	4.73291	1.09075e-15	2.36698e-14
ENSMUSG00000025330	Padi4	8.24073	4.7374	1.09839e-15	2.37864e-14
ENSMUSG00000037348	Paqr7	1.6558	5.75026	1.11319e-15	2.40572e-14
ENSMUSG00000055044	Pdlim1	-2.56647	4.31577	1.11612e-15	2.40711e-14
ENSMUSG00000026922	Agpat2	2.54122	5.80886	1.12186e-15	2.41453e-14
ENSMUSG00000028068	Iqgap3	1.46507	6.69372	1.2056e-15	2.58945e-14
ENSMUSG00000037410	Tbc1d2b	1.37139	6.90078	1.22645e-15	2.62885e-14
ENSMUSG00000033423	Eri3	-1.60668	5.28904	1.23571e-15	2.64332e-14
ENSMUSG00000029098	Acox3	2.90569	6.29234	1.24232e-15	2.65205e-14
ENSMUSG00000030681	Mvp	1.78031	5.59158	1.25447e-15	2.66982e-14
ENSMUSG00000006728	Cdk4	-1.53583	8.31274	1.25573e-15	2.66982e-14
ENSMUSG00000026426	Arl8a	1.40591	5.82093	1.28171e-15	2.71955e-14
ENSMUSG00000026480	Ncf2	1.52084	8.39435	1.29658e-15	2.74555e-14
ENSMUSG00000034593	Myo5a	1.56976	7.80359	1.30794e-15	2.76405e-14
ENSMUSG00000026581	Sell	3.57139	6.1954	1.34227e-15	2.82864e-14
ENSMUSG00000031711	Zfp330	-1.26042	5.97245	1.34389e-15	2.82864e-14
ENSMUSG00000037533	Rapgef6	1.53759	7.38887	1.34698e-15	2.82947e-14
ENSMUSG00000027698	Nceh1	2.2671	6.10659	1.35505e-15	2.84073e-14
ENSMUSG00000003161	Sri	2.02323	7.1874	1.3626e-15	2.85086e-14
ENSMUSG00000028646	Rragc	1.48509	7.00993	1.37733e-15	2.87597e-14
ENSMUSG00000056071	S100a9	6.60367	8.25668	1.38694e-15	2.89029e-14
ENSMUSG00000018509	Cenpv	-2.79169	4.93867	1.39064e-15	2.89226e-14
ENSMUSG00000102752	Gm7694	7.13778	1.68818	1.39719e-15	2.90014e-14
ENSMUSG00000107355	AI839979	6.19311	1.87192	1.40218e-15	2.90476e-14
ENSMUSG00000028962	Slc4a2	1.4641	6.11202	1.40776e-15	2.91057e-14
ENSMUSG00000022372	Sla	1.59994	7.80761	1.42707e-15	2.94471e-14
ENSMUSG00000034833	Tespa1	-4.40854	4.56873	1.47597e-15	3.03963e-14
ENSMUSG00000000134	Tfe3	1.71249	5.46557	1.50358e-15	3.09043e-14
ENSMUSG00000037638	Zbtb42	3.97177	2.60015	1.52275e-15	3.12371e-14
ENSMUSG00000043881	Kbtbd7	2.47698	5.03295	1.5344e-15	3.14149e-14
ENSMUSG00000040809	Chil3	10.1879	5.61092	1.56302e-15	3.19385e-14
ENSMUSG00000037544	Dlgap5	1.26783	7.15258	1.57773e-15	3.21765e-14
ENSMUSG00000021990	Spata13	1.37871	6.90532	1.59521e-15	3.247e-14
ENSMUSG00000038712	Mindy1	1.55078	6.23682	1.60767e-15	3.26602e-14
ENSMUSG00000020484	Xbp1	1.3481	7.9125	1.62457e-15	3.294e-14
ENSMUSG00000020396	Nefh	-5.57434	2.98317	1.66304e-15	3.3655e-14
ENSMUSG00000023010	Tmbim6	1.39556	9.27888	1.67477e-15	3.38272e-14
ENSMUSG00000039789	Zfp597	1.87067	4.75583	1.69235e-15	3.41165e-14
ENSMUSG00000067148	Polr1c	-1.54959	5.38414	1.70169e-15	3.41739e-14
ENSMUSG00000027215	Cd82	2.58771	5.72353	1.7017e-15	3.41739e-14
ENSMUSG00000071708	Sms	-1.90117	6.47817	1.71967e-15	3.4469e-14
ENSMUSG00000005566	Trim28	-1.79375	8.51681	1.75255e-15	3.50609e-14
ENSMUSG00000063234	Gpr84	4.32251	4.60237	1.80132e-15	3.59681e-14
ENSMUSG00000028530	Jak1	1.17492	8.06699	1.82009e-15	3.62741e-14
ENSMUSG00000047810	Ccdc88b	1.55519	7.38446	1.83165e-15	3.64353e-14
ENSMUSG00000035960	Apex1	-2.49173	6.61537	1.84533e-15	3.66379e-14
ENSMUSG00000026615	Eprs	-1.38966	8.10934	1.88233e-15	3.7302e-14
ENSMUSG00000034255	Arhgap27	1.64307	5.95485	1.89467e-15	3.74759e-14
ENSMUSG00000032041	Tirap	2.26945	5.32032	1.91379e-15	3.7783e-14
ENSMUSG00000108414	Snhg1	-2.36259	5.96644	1.93838e-15	3.81966e-14
ENSMUSG00000004043	Stat5a	-1.4566	5.84603	1.94333e-15	3.82225e-14
ENSMUSG00000033335	Dnm2	1.16264	7.86271	1.96185e-15	3.85146e-14
ENSMUSG00000061665	Cd2ap	-2.5418	4.39678	1.98657e-15	3.89272e-14
ENSMUSG00000027109	Sp3	1.57563	7.43705	2.00301e-15	3.91762e-14
ENSMUSG00000020650	Bcap29	-1.84453	6.47097	2.01324e-15	3.93031e-14
ENSMUSG00000024948	Map4k2	1.87695	6.61223	2.07722e-15	4.04206e-14
ENSMUSG00000020097	Sgpl1	1.98147	6.41202	2.07857e-15	4.04206e-14
ENSMUSG00000016534	Lamp2	1.62686	8.48676	2.08465e-15	4.04206e-14
ENSMUSG00000071068	Treml2	1.37344	7.95567	2.08588e-15	4.04206e-14
ENSMUSG00000021868	Ppif	-2.70369	5.03432	2.11558e-15	4.09207e-14
ENSMUSG00000024776	Stambpl1	2.26721	4.09245	2.13674e-15	4.1254e-14
ENSMUSG00000021591	Glrx	2.40087	6.51993	2.16917e-15	4.18032e-14
ENSMUSG00000026176	Ctdsp1	1.14921	7.25778	2.17979e-15	4.19311e-14
ENSMUSG00000027199	Gatm	2.41255	4.78692	2.19543e-15	4.21547e-14
ENSMUSG00000058799	Nap1l1	-1.38248	9.02746	2.20228e-15	4.22089e-14
ENSMUSG00000034164	Emid1	-4.44966	4.8635	2.25399e-15	4.31213e-14
ENSMUSG00000032018	Sc5d	1.54245	6.97594	2.25981e-15	4.31542e-14
ENSMUSG00000064120	Mocs1	1.39761	5.92495	2.29759e-15	4.3796e-14
ENSMUSG00000024177	Nme4	-4.07436	2.97567	2.34315e-15	4.45835e-14
ENSMUSG00000053175	Bcl3	5.12315	3.04554	2.3569e-15	4.4764e-14
ENSMUSG00000026313	Hdac4	2.19968	4.77778	2.39952e-15	4.54913e-14
ENSMUSG00000015217	Hmgb3	-1.3792	6.85792	2.422e-15	4.58347e-14
ENSMUSG00000019790	Stxbp5	1.27152	8.1504	2.45154e-15	4.63103e-14
ENSMUSG00000023048	Prr13	1.79286	6.50147	2.45988e-15	4.63844e-14
ENSMUSG00000026181	Ppm1f	-1.53424	7.44313	2.47358e-15	4.65591e-14
ENSMUSG00000044452	Zfp507	-2.03142	5.34989	2.48444e-15	4.66798e-14
ENSMUSG00000030530	Furin	2.26207	6.03616	2.51768e-15	4.72199e-14
ENSMUSG00000018820	Zfyve27	1.74795	6.50379	2.53265e-15	4.74162e-14
ENSMUSG00000019528	Gyg	1.35079	7.57039	2.54314e-15	4.75252e-14
ENSMUSG00000021322	Aoah	2.39983	5.85601	2.54753e-15	4.75252e-14
ENSMUSG00000031939	Taf1d	-2.15374	6.47076	2.63547e-15	4.90786e-14
ENSMUSG00000021069	Pygl	3.33797	8.63218	2.65285e-15	4.92311e-14
ENSMUSG00000026944	Abca2	-1.52986	6.86479	2.65303e-15	4.92311e-14
ENSMUSG00000028869	Gnl2	-1.3501	6.58565	2.66335e-15	4.93354e-14
ENSMUSG00000024975	Pdcd4	-2.94718	5.90774	2.67184e-15	4.94055e-14
ENSMUSG00000005103	Wdr1	1.7861	8.58246	2.68364e-15	4.95365e-14
ENSMUSG00000034850	Tmem127	1.58656	5.78984	2.72302e-15	5.01752e-14
ENSMUSG00000040560	Wdr7	1.9163	5.94645	2.73427e-15	5.02943e-14
ENSMUSG00000041852	Tcf20	1.25588	7.05499	2.74641e-15	5.04293e-14
ENSMUSG00000024120	Lrpprc	-1.73521	6.6916	2.77546e-15	5.08737e-14
ENSMUSG00000031021	Tmem9b	2.05549	5.60946	2.86372e-15	5.23387e-14
ENSMUSG00000079597	Cstdc4	11.8905	4.4407	2.86535e-15	5.23387e-14
ENSMUSG00000026127	Imp4	-1.40199	6.52552	2.87846e-15	5.24869e-14
ENSMUSG00000026192	Atic	-2.5947	7.07059	2.90491e-15	5.28774e-14
ENSMUSG00000029364	Wsb2	2.02995	5.00282	2.92359e-15	5.31253e-14
ENSMUSG00000037907	Ankrd13b	-5.15668	3.33645	3.00403e-15	5.44927e-14
ENSMUSG00000046434	Hnrnpa1	-1.34375	9.83995	3.0101e-15	5.45087e-14
ENSMUSG00000042594	Sh2b3	1.41138	6.36248	3.02959e-15	5.47673e-14
ENSMUSG00000020167	Tcf3	-1.1487	6.33942	3.03767e-15	5.48189e-14
ENSMUSG00000059474	Mbtd1	-1.69636	6.30796	3.05234e-15	5.49892e-14
ENSMUSG00000025473	Adam8	5.49355	4.68181	3.06887e-15	5.51924e-14
ENSMUSG00000037685	Atp8a1	2.44618	6.15399	3.09896e-15	5.55902e-14
ENSMUSG00000022707	Gbe1	1.90833	5.73586	3.10158e-15	5.55902e-14
ENSMUSG00000023915	Tnfrsf21	1.988	5.96099	3.12775e-15	5.59639e-14
ENSMUSG00000085882	2610507I01Rik	1.70757	4.55806	3.14644e-15	5.62025e-14
ENSMUSG00000017999	Ddx27	-1.77306	6.47498	3.17667e-15	5.65864e-14
ENSMUSG00000036599	Chst12	1.67452	6.59577	3.17871e-15	5.65864e-14
ENSMUSG00000052087	Rgs14	2.52018	5.2073	3.26245e-15	5.79788e-14
ENSMUSG00000038650	Rnh1	1.6747	7.28871	3.30172e-15	5.85776e-14
ENSMUSG00000021149	Gtpbp4	-1.86712	6.80928	3.31788e-15	5.87651e-14
ENSMUSG00000044783	Hjurp	1.05315	8.82223	3.34363e-15	5.91214e-14
ENSMUSG00000037553	Zdhhc18	1.25549	6.3763	3.36039e-15	5.93179e-14
ENSMUSG00000026395	Ptprc	1.77482	9.13313	3.38217e-15	5.96023e-14
ENSMUSG00000020640	Itsn2	1.55373	7.74137	3.41339e-15	6.00516e-14
ENSMUSG00000032000	Birc3	1.83312	5.52717	3.44248e-15	6.04621e-14
ENSMUSG00000000204	Slfn4	7.66854	3.34536	3.47663e-15	6.09599e-14
ENSMUSG00000001995	Sipa1l2	4.3414	3.31706	3.51992e-15	6.16162e-14
ENSMUSG00000022265	Ank	-3.33578	4.36723	3.54846e-15	6.20125e-14
ENSMUSG00000028430	Nol6	-2.38287	5.72873	3.56306e-15	6.21642e-14
ENSMUSG00000043439	Epop	-3.33646	3.74321	3.69139e-15	6.42963e-14
ENSMUSG00000097354	2310001H17Rik	2.28739	4.19232	3.71055e-15	6.45231e-14
ENSMUSG00000028207	Asph	-2.3577	5.82951	3.74409e-15	6.49986e-14
ENSMUSG00000056917	Sipa1	1.64596	7.48296	3.77151e-15	6.53666e-14
ENSMUSG00000026880	Stom	1.59656	7.57697	3.78901e-15	6.55618e-14
ENSMUSG00000038058	Nod1	4.17223	3.50893	3.8305e-15	6.61707e-14
ENSMUSG00000000374	Trappc10	1.36576	6.47152	3.89749e-15	6.72173e-14
ENSMUSG00000032322	Pstpip1	1.71572	7.41925	3.91717e-15	6.7446e-14
ENSMUSG00000039361	Picalm	1.31887	7.68445	3.93135e-15	6.75793e-14
ENSMUSG00000076431	Sox4	-6.63302	3.85076	3.96047e-15	6.79686e-14
ENSMUSG00000012428	Steap4	8.47112	-1.5598	3.98609e-15	6.81972e-14
ENSMUSG00000020280	Pus10	-1.44701	6.28876	3.98677e-15	6.81972e-14
ENSMUSG00000003283	Hck	3.25492	5.95689	4.01345e-15	6.8542e-14
ENSMUSG00000027506	Tpd52	2.19327	6.90185	4.05213e-15	6.90687e-14
ENSMUSG00000047714	Ppp1r2	1.62922	6.42548	4.06101e-15	6.90687e-14
ENSMUSG00000035697	Arhgap45	1.27035	8.65382	4.06403e-15	6.90687e-14
ENSMUSG00000020300	Cpeb4	3.07817	5.68905	4.10577e-15	6.96654e-14
ENSMUSG00000026234	Ncl	-1.58381	10.1993	4.13141e-15	6.99875e-14
ENSMUSG00000024014	Pim1	3.62164	6.63809	4.22715e-15	7.1494e-14
ENSMUSG00000034707	Gns	1.46538	6.28522	4.24359e-15	7.15702e-14
ENSMUSG00000066684	Pilrb1	4.16291	3.58754	4.24529e-15	7.15702e-14
ENSMUSG00000001909	Trmt1	-2.08736	5.92762	4.25962e-15	7.16967e-14
ENSMUSG00000001783	Rtcb	-1.29688	7.12022	4.27123e-15	7.17771e-14
ENSMUSG00000005442	Cic	1.46601	7.45336	4.32935e-15	7.26377e-14
ENSMUSG00000035901	Dennd5a	1.21579	7.23385	4.36493e-15	7.30263e-14
ENSMUSG00000022800	Fyttd1	-1.69838	5.62346	4.36642e-15	7.30263e-14
ENSMUSG00000063884	Ptcd3	-1.4383	6.58218	4.39526e-15	7.33407e-14
ENSMUSG00000035376	Hacd2	1.54181	5.97979	4.39919e-15	7.33407e-14
ENSMUSG00000073982	Rhog	1.41483	7.97246	4.40785e-15	7.33686e-14
ENSMUSG00000025486	Sirt3	-1.52373	5.07686	4.4787e-15	7.44011e-14
ENSMUSG00000019907	Ppp1r12a	1.38618	7.54718	4.48404e-15	7.44011e-14
ENSMUSG00000026104	Stat1	2.57625	4.43727	4.51289e-15	7.47616e-14
ENSMUSG00000024856	Cdk2ap2	1.42047	5.92854	4.52555e-15	7.48533e-14
ENSMUSG00000035711	Dok3	1.43335	7.42895	4.54395e-15	7.50394e-14
ENSMUSG00000027395	Polr1b	-3.30788	5.60864	4.56148e-15	7.52107e-14
ENSMUSG00000024654	Asrgl1	-1.74019	5.40649	4.58734e-15	7.55185e-14
ENSMUSG00000039294	Cybc1	1.35414	6.19651	4.60501e-15	7.56636e-14
ENSMUSG00000029366	Dck	1.72087	6.6691	4.61056e-15	7.56636e-14
ENSMUSG00000033379	Atp6v0b	1.54846	7.18674	4.63473e-15	7.58444e-14
ENSMUSG00000030509	Asb7	1.67864	4.82501	4.63602e-15	7.58444e-14
ENSMUSG00000062585	Cnr2	2.36183	5.19324	4.66734e-15	7.62381e-14
ENSMUSG00000062604	Srpk2	1.26382	7.23604	4.68156e-15	7.63515e-14
ENSMUSG00000022558	Mroh1	1.79325	5.57582	4.73415e-15	7.70897e-14
ENSMUSG00000034285	Nipsnap1	-2.52759	4.31589	4.77845e-15	7.76429e-14
ENSMUSG00000057672	Pkn1	1.47293	8.11342	4.78292e-15	7.76429e-14
ENSMUSG00000049823	Zbtb12	-2.93641	4.13608	4.82702e-15	7.82379e-14
ENSMUSG00000037731	Themis2	2.37369	5.12603	4.84411e-15	7.8394e-14
ENSMUSG00000024271	Elp2	-1.38312	6.88548	4.92151e-15	7.9524e-14
ENSMUSG00000097378	B230208H11Rik	4.03212	3.04351	4.96981e-15	8.01811e-14
ENSMUSG00000034116	Vav1	1.08434	8.10229	4.99719e-15	8.04992e-14
ENSMUSG00000043940	Wdfy3	1.43919	6.66726	5.00997e-15	8.05816e-14
ENSMUSG00000097762	4732463B04Rik	-7.42694	-1.325	5.0572e-15	8.1119e-14
ENSMUSG00000026222	Sp100	2.41904	6.38368	5.05884e-15	8.1119e-14
ENSMUSG00000015176	Nolc1	-2.86999	7.31621	5.0753e-15	8.12589e-14
ENSMUSG00000040463	Mybbp1a	-2.68889	8.30745	5.09666e-15	8.14487e-14
ENSMUSG00000031508	Ankrd10	-1.71903	6.05086	5.10346e-15	8.14487e-14
ENSMUSG00000019977	Hbs1l	-1.21724	7.06553	5.11042e-15	8.14487e-14
ENSMUSG00000025264	Tsr2	-2.61377	4.18774	5.12425e-15	8.1452e-14
ENSMUSG00000111514	E230014E18Rik	9.29703	-1.0519	5.13051e-15	8.1452e-14
ENSMUSG00000030987	Stim1	1.64884	6.63173	5.14251e-15	8.1452e-14
ENSMUSG00000066150	Slc31a1	1.40182	7.00383	5.14601e-15	8.1452e-14
ENSMUSG00000040105	Plpp6	1.83767	3.70372	5.1494e-15	8.1452e-14
ENSMUSG00000018008	Cyth4	1.43043	6.58926	5.1854e-15	8.18981e-14
ENSMUSG00000027695	Pld1	3.02969	3.36637	5.2151e-15	8.22435e-14
ENSMUSG00000031367	Ap1s2	2.22157	4.56151	5.31709e-15	8.37262e-14
ENSMUSG00000024338	Psmb8	-1.1309	6.69649	5.36582e-15	8.43295e-14
ENSMUSG00000048677	Tpcn2	2.52614	4.77168	5.37146e-15	8.43295e-14
ENSMUSG00000030704	Rab6a	1.14432	7.76023	5.43756e-15	8.52398e-14
ENSMUSG00000025223	Ldb1	-1.11705	7.00609	5.4881e-15	8.59039e-14
ENSMUSG00000066258	Trim12a	1.75523	4.97496	5.5543e-15	8.68107e-14
ENSMUSG00000001418	Glmp	1.22643	6.91644	5.56574e-15	8.68603e-14
ENSMUSG00000034610	Tut4	-1.86612	5.61927	5.5964e-15	8.72091e-14
ENSMUSG00000037824	Tspan14	1.10655	7.0143	5.62517e-15	8.75276e-14
ENSMUSG00000066151	Fkbp15	1.28305	6.81502	5.66106e-15	8.79435e-14
ENSMUSG00000001436	Slc19a1	-3.37645	4.65141	5.66864e-15	8.79435e-14
ENSMUSG00000039156	Stim2	1.32058	5.5376	5.71164e-15	8.84799e-14
ENSMUSG00000032959	Pebp1	-1.61199	7.62748	5.73985e-15	8.87648e-14
ENSMUSG00000040945	Rcc2	-1.53946	8.56808	5.74694e-15	8.87648e-14
ENSMUSG00000011884	Gltp	1.30415	5.94983	5.76104e-15	8.8852e-14
ENSMUSG00000042745	Id1	3.38801	3.86088	5.8927e-15	9.07492e-14
ENSMUSG00000032712	Resf1	1.92791	5.74853	5.92918e-15	9.11512e-14
ENSMUSG00000036356	Csgalnact1	-4.93287	3.66309	5.93615e-15	9.11512e-14
ENSMUSG00000024104	Washc2	1.38688	7.49962	5.95725e-15	9.13415e-14
ENSMUSG00000035311	Gnptab	-2.43596	7.0933	5.99114e-15	9.17273e-14
ENSMUSG00000061778	Mospd2	1.87646	5.74384	6.00837e-15	9.18573e-14
ENSMUSG00000049562	Ap5b1	3.10153	4.94554	6.01845e-15	9.18776e-14
ENSMUSG00000039987	Phtf2	-1.8488	4.89638	6.04027e-15	9.20769e-14
ENSMUSG00000043671	Dpy19l3	-2.16545	4.48298	6.06362e-15	9.22751e-14
ENSMUSG00000071369	Map3k5	1.55467	5.69752	6.07085e-15	9.22751e-14
ENSMUSG00000020741	Cluh	-3.28839	6.40482	6.15643e-15	9.34407e-14
ENSMUSG00000022218	Tgm1	6.52039	2.0169	6.1767e-15	9.36132e-14
ENSMUSG00000027073	Prg2	3.89713	6.69986	6.22192e-15	9.41626e-14
ENSMUSG00000018899	Irf1	1.66491	5.36632	6.25226e-15	9.44761e-14
ENSMUSG00000032570	Atp2c1	1.3905	6.32474	6.26063e-15	9.44761e-14
ENSMUSG00000038502	Ptov1	-2.23925	5.52747	6.43149e-15	9.69153e-14
ENSMUSG00000021687	Scamp1	1.86137	6.42169	6.481e-15	9.75214e-14
ENSMUSG00000097195	Snhg5	-2.02726	5.40927	6.57289e-15	9.87626e-14
ENSMUSG00000027509	Rae1	-1.36462	6.35061	6.58971e-15	9.88739e-14
ENSMUSG00000112980	D430020J02Rik	1.65386	4.68011	6.60682e-15	9.89689e-14
ENSMUSG00000030083	Abtb1	2.36623	6.40615	6.61489e-15	9.89689e-14
ENSMUSG00000039005	Tlr4	2.54139	5.64606	6.64402e-15	9.91464e-14
ENSMUSG00000000794	Kcnn3	10.062	-1.12736	6.64563e-15	9.91464e-14
ENSMUSG00000038990	Cables2	1.69651	5.21119	6.7054e-15	9.97896e-14
ENSMUSG00000042729	Wdr74	-2.18354	5.33009	6.70775e-15	9.97896e-14
ENSMUSG00000066682	Pilrb2	4.45034	4.09327	6.75185e-15	1.00304e-13
ENSMUSG00000026923	Notch1	2.3999	6.21329	6.77968e-15	1.00575e-13
ENSMUSG00000036743	Psma8	-2.59507	4.15902	6.80017e-15	1.00736e-13
ENSMUSG00000028494	Plin2	2.31686	7.63136	6.83035e-15	1.01041e-13
ENSMUSG00000028468	Rgp1	1.25729	6.56613	6.86664e-15	1.01435e-13
ENSMUSG00000042215	Bag2	-2.98228	4.1716	7.12351e-15	1.05082e-13
ENSMUSG00000025358	Cdk2	1.22481	7.67221	7.13587e-15	1.05116e-13
ENSMUSG00000035934	Pknox2	8.54809	-2.08407	7.18318e-15	1.05592e-13
ENSMUSG00000040061	Plcb2	1.18119	8.72995	7.18829e-15	1.05592e-13
ENSMUSG00000008318	Relt	1.90008	5.23997	7.22611e-15	1.06e-13
ENSMUSG00000064254	Ethe1	1.91427	6.04103	7.26976e-15	1.06491e-13
ENSMUSG00000005470	Asf1b	1.73839	6.87227	7.32664e-15	1.07175e-13
ENSMUSG00000032035	Ets1	6.07751	3.00502	7.35793e-15	1.07483e-13
ENSMUSG00000015932	Dstn	2.22021	8.77736	7.43984e-15	1.08529e-13
ENSMUSG00000028161	Ppp3ca	1.4528	7.25901	7.48292e-15	1.09006e-13
ENSMUSG00000034848	Ttc21b	-2.78631	3.97495	7.50745e-15	1.09155e-13
ENSMUSG00000063450	Syne2	4.47326	3.7533	7.51779e-15	1.09155e-13
ENSMUSG00000030421	Uri1	-1.42003	5.93933	7.52438e-15	1.09155e-13
ENSMUSG00000021892	Sh3bp5	4.27388	4.63556	7.56047e-15	1.09528e-13
ENSMUSG00000022090	Pdlim2	2.13098	5.07075	7.58298e-15	1.09703e-13
ENSMUSG00000071561	Cstdc5	10.6723	5.08118	7.64571e-15	1.10388e-13
ENSMUSG00000020638	Cmpk2	2.42207	3.8258	7.65137e-15	1.10388e-13
ENSMUSG00000032688	Malt1	1.3314	6.11537	7.74602e-15	1.116e-13
ENSMUSG00000026180	Cxcr2	7.58375	4.66462	7.77434e-15	1.11855e-13
ENSMUSG00000072620	Slfn2	7.49049	4.53351	7.78566e-15	1.11864e-13
ENSMUSG00000020978	Klhdc2	-1.71584	6.03138	7.93235e-15	1.13816e-13
ENSMUSG00000021485	Mxd3	2.67862	3.53157	7.9801e-15	1.14345e-13
ENSMUSG00000079553	Kifc1	1.31656	6.66689	7.99973e-15	1.1447e-13
ENSMUSG00000018654	Ikzf1	1.22165	8.56512	8.02799e-15	1.14718e-13
ENSMUSG00000061414	Cracr2a	1.94562	3.98124	8.07805e-15	1.15173e-13
ENSMUSG00000024066	Xdh	6.3963	4.32553	8.08177e-15	1.15173e-13
ENSMUSG00000040653	Ppp1r14c	-5.50467	4.12873	8.11107e-15	1.15434e-13
ENSMUSG00000032135	Mcam	6.44519	0.485723	8.17245e-15	1.16104e-13
ENSMUSG00000015149	Sirt2	1.60705	6.0284	8.18021e-15	1.16104e-13
ENSMUSG00000030126	Tmcc1	2.2583	3.30762	8.20413e-15	1.16286e-13
ENSMUSG00000001128	Cfp	2.63309	5.34558	8.34358e-15	1.18103e-13
ENSMUSG00000030336	Cd27	-8.8424	-0.625424	8.46413e-15	1.19648e-13
ENSMUSG00000031984	2810004N23Rik	-1.27086	5.84579	8.6046e-15	1.21471e-13
ENSMUSG00000001674	Ddx18	-2.00704	6.63045	8.68974e-15	1.22508e-13
ENSMUSG00000000682	Cd52	3.31548	6.00108	8.77514e-15	1.23455e-13
ENSMUSG00000057561	Eif1a	-1.71001	6.97763	8.78236e-15	1.23455e-13
ENSMUSG00000022246	Rai14	-2.65187	4.21867	8.79248e-15	1.23455e-13
ENSMUSG00000113701	B230303A05Rik	10.0114	-0.469026	8.80398e-15	1.23455e-13
ENSMUSG00000021697	Depdc1b	1.81937	5.52742	8.82804e-15	1.23628e-13
ENSMUSG00000005803	Sqor	5.81679	3.36035	8.89881e-15	1.24453e-13
ENSMUSG00000039176	Polg	1.18597	6.85804	8.92e-15	1.24583e-13
ENSMUSG00000001089	Luzp1	-4.28868	2.74747	9.00665e-15	1.25627e-13
ENSMUSG00000022685	Parn	-1.47318	5.29351	9.12731e-15	1.27077e-13
ENSMUSG00000035173	Ccdc186	1.74179	5.18822	9.13486e-15	1.27077e-13
ENSMUSG00000034957	Cebpa	-1.29096	7.43515	9.17103e-15	1.27412e-13
ENSMUSG00000020128	Vps54	1.19925	6.36346	9.27787e-15	1.28706e-13
ENSMUSG00000021731	Mrps30	-1.42433	5.55753	9.28867e-15	1.28706e-13
ENSMUSG00000024077	Strn	1.65744	6.83839	9.38589e-15	1.29866e-13
ENSMUSG00000030465	Psd3	-4.25415	4.30639	9.39715e-15	1.29866e-13
ENSMUSG00000034024	Cct2	-0.971991	9.05155	9.48833e-15	1.30867e-13
ENSMUSG00000059883	Irak4	1.36539	5.8374	9.49724e-15	1.30867e-13
ENSMUSG00000021822	Plau	4.1736	2.30573	9.50693e-15	1.30867e-13
ENSMUSG00000028559	Osbpl9	1.9115	6.70693	9.54361e-15	1.312e-13
ENSMUSG00000055653	Gpc3	-3.31438	6.91416	9.59719e-15	1.31764e-13
ENSMUSG00000020085	Aifm2	2.53315	4.63298	9.61505e-15	1.31837e-13
ENSMUSG00000004864	Mapk13	5.99383	2.96703	9.63771e-15	1.31975e-13
ENSMUSG00000042364	Snx18	1.42789	6.42351	9.68828e-15	1.32495e-13
ENSMUSG00000049130	C5ar1	10.2783	1.10313	9.75959e-15	1.33296e-13
ENSMUSG00000017737	Mmp9	11.7866	0.738638	9.80103e-15	1.33689e-13
ENSMUSG00000049775	Tmsb4x	1.87716	10.039	9.8447e-15	1.3411e-13
ENSMUSG00000040620	Dhx33	-2.64155	5.42869	9.88771e-15	1.34484e-13
ENSMUSG00000035790	Cep19	1.86486	4.77619	9.89772e-15	1.34484e-13
ENSMUSG00000026478	Lamc1	-2.80597	5.56494	9.94936e-15	1.34865e-13
ENSMUSG00000032324	Tspan3	-3.30297	3.50395	9.9515e-15	1.34865e-13
ENSMUSG00000024899	Papss2	-1.64939	8.21749	9.9834e-15	1.35123e-13
ENSMUSG00000026341	Actr3	1.14536	9.82943	1.00628e-14	1.36023e-13
ENSMUSG00000002699	Lcp2	3.34522	6.19922	1.01012e-14	1.36366e-13
ENSMUSG00000027947	Il6ra	1.87356	5.10982	1.01154e-14	1.36383e-13
ENSMUSG00000030559	Rab38	-2.59775	4.87341	1.02819e-14	1.38449e-13
ENSMUSG00000021451	Sema4d	1.96041	5.80361	1.03792e-14	1.39538e-13
ENSMUSG00000024270	Slc39a6	-1.50337	6.18387	1.03932e-14	1.39538e-13
ENSMUSG00000026797	Stxbp1	-4.26735	2.37361	1.04025e-14	1.39538e-13
ENSMUSG00000019920	Lims1	1.26882	8.02973	1.0443e-14	1.39902e-13
ENSMUSG00000087187	Gm13431	2.74104	3.37758	1.0612e-14	1.41985e-13
ENSMUSG00000020430	Pes1	-1.30044	7.2047	1.06696e-14	1.42573e-13
ENSMUSG00000009647	Mcu	1.73198	5.91293	1.08634e-14	1.44979e-13
ENSMUSG00000048897	Zfp710	1.8076	6.11913	1.08872e-14	1.45112e-13
ENSMUSG00000042590	Ipo11	-2.09064	5.5968	1.0941e-14	1.45644e-13
ENSMUSG00000032288	Imp3	-1.52936	5.32232	1.09565e-14	1.45666e-13
ENSMUSG00000025014	Dntt	-7.71684	-1.28774	1.09986e-14	1.46041e-13
ENSMUSG00000024219	Anks1	-1.02279	7.00938	1.10656e-14	1.46745e-13
ENSMUSG00000032178	Ilf3	-1.08798	7.19786	1.11879e-14	1.48179e-13
ENSMUSG00000039396	Neil3	1.68764	6.47104	1.12722e-14	1.49109e-13
ENSMUSG00000002668	Dennd1c	2.53131	5.30637	1.15725e-14	1.52888e-13
ENSMUSG00000032497	Lrrfip2	1.82827	6.31452	1.1605e-14	1.53124e-13
ENSMUSG00000007891	Ctsd	1.90085	8.48732	1.17115e-14	1.54173e-13
ENSMUSG00000031441	Atp11a	1.74108	6.68631	1.17138e-14	1.54173e-13
ENSMUSG00000028124	Gclm	1.9819	7.39309	1.17308e-14	1.54203e-13
ENSMUSG00000074480	Mex3a	-6.79166	2.34141	1.1839e-14	1.55431e-13
ENSMUSG00000021846	Peli2	3.87512	2.41271	1.18723e-14	1.55674e-13
ENSMUSG00000113184	Gm49654	9.04313	-1.31289	1.20129e-14	1.57277e-13
ENSMUSG00000029328	Hnrnpdl	-1.09327	8.09221	1.20316e-14	1.57277e-13
ENSMUSG00000041439	Mfsd6	4.3844	4.01504	1.20394e-14	1.57277e-13
ENSMUSG00000024121	Atp6v0c	1.53299	7.34798	1.20826e-14	1.57645e-13
ENSMUSG00000030707	Coro1a	1.54151	9.50592	1.21132e-14	1.57736e-13
ENSMUSG00000036777	Anln	1.21734	7.21953	1.21197e-14	1.57736e-13
ENSMUSG00000040596	Pogk	-2.73014	4.3969	1.22198e-14	1.58843e-13
ENSMUSG00000073423	Zfp414	1.64277	4.55385	1.22471e-14	1.58974e-13
ENSMUSG00000020346	Mgat1	1.19076	6.17326	1.22602e-14	1.58974e-13
ENSMUSG00000050244	Heatr1	-2.04579	7.15445	1.2342e-14	1.59642e-13
ENSMUSG00000020325	Fstl3	4.31582	1.04542	1.23421e-14	1.59642e-13
ENSMUSG00000031101	Sash3	1.36747	7.32638	1.2376e-14	1.59883e-13
ENSMUSG00000030788	Rnf141	1.47184	5.58997	1.23938e-14	1.59916e-13
ENSMUSG00000062234	Gak	1.03034	7.48201	1.24159e-14	1.60005e-13
ENSMUSG00000054733	Msra	2.12766	5.88637	1.25142e-14	1.61075e-13
ENSMUSG00000048865	Arhgap30	1.42884	7.86655	1.27996e-14	1.64518e-13
ENSMUSG00000061311	Rag1	-7.72408	-1.39777	1.28204e-14	1.64518e-13
ENSMUSG00000046079	Lrrc8d	1.53576	6.67105	1.28287e-14	1.64518e-13
ENSMUSG00000032409	Atr	-2.16013	5.69942	1.28574e-14	1.64685e-13
ENSMUSG00000113010	Gm34084	3.87072	2.25037	1.30266e-14	1.66587e-13
ENSMUSG00000024180	Pgap6	2.25812	3.34831	1.30376e-14	1.66587e-13
ENSMUSG00000020437	Myo1g	1.08165	8.0751	1.31544e-14	1.67874e-13
ENSMUSG00000038335	Tsr1	-2.1616	6.24377	1.32624e-14	1.69048e-13
ENSMUSG00000028048	Gba	1.56099	6.70941	1.3383e-14	1.70377e-13
ENSMUSG00000028889	Yrdc	-1.5723	4.80422	1.3404e-14	1.70439e-13
ENSMUSG00000024667	Tmem216	2.23678	4.71893	1.36115e-14	1.72868e-13
ENSMUSG00000028420	Tmem38b	1.92555	5.75611	1.36954e-14	1.73723e-13
ENSMUSG00000030921	Trim30a	1.58757	5.91086	1.37682e-14	1.74436e-13
ENSMUSG00000059013	Sh2d3c	2.06536	5.65226	1.41895e-14	1.79557e-13
ENSMUSG00000025492	Ifitm3	1.89648	7.76329	1.42318e-14	1.79876e-13
ENSMUSG00000021585	Cast	1.47858	7.21411	1.46379e-14	1.84786e-13
ENSMUSG00000027597	Ahcy	-1.69294	7.47503	1.4661e-14	1.84855e-13
ENSMUSG00000059555	Tor4a	1.57266	6.05779	1.48019e-14	1.86408e-13
ENSMUSG00000015340	Cybb	10.6499	3.6362	1.48842e-14	1.8722e-13
ENSMUSG00000057143	Trim12c	1.67158	5.50097	1.4994e-14	1.88376e-13
ENSMUSG00000044092	C130050O18Rik	3.37663	3.1287	1.51342e-14	1.8991e-13
ENSMUSG00000005824	Tnfsf14	2.96462	3.4975	1.51755e-14	1.90188e-13
ENSMUSG00000003500	Impdh1	-1.8163	7.22041	1.51926e-14	1.90188e-13
ENSMUSG00000034327	Kctd9	1.22993	5.84537	1.54026e-14	1.92588e-13
ENSMUSG00000105692	Gm43737	2.34722	3.45581	1.54217e-14	1.92597e-13
ENSMUSG00000022962	Gart	-1.88725	7.72434	1.54947e-14	1.93279e-13
ENSMUSG00000024645	Timm21	-1.58322	5.24374	1.59566e-14	1.98467e-13
ENSMUSG00000001098	Kctd10	1.40434	6.79447	1.5964e-14	1.98467e-13
ENSMUSG00000056749	Nfil3	2.72237	4.84937	1.59833e-14	1.98467e-13
ENSMUSG00000036208	Nepro	-1.38747	4.90481	1.59862e-14	1.98467e-13
ENSMUSG00000034793	G6pc3	-1.81958	6.10596	1.60198e-14	1.98649e-13
ENSMUSG00000032481	Smarcc1	-1.51128	7.2889	1.61032e-14	1.99448e-13
ENSMUSG00000021193	Pitrm1	-1.90326	7.01397	1.61358e-14	1.99491e-13
ENSMUSG00000030930	Chst15	3.96005	3.47698	1.61447e-14	1.99491e-13
ENSMUSG00000021365	Nedd9	2.0147	6.01761	1.63591e-14	2.01903e-13
ENSMUSG00000026623	Lpgat1	1.66019	7.65405	1.69852e-14	2.09384e-13
ENSMUSG00000090213	Peds1	1.72609	5.181	1.70061e-14	2.09397e-13
ENSMUSG00000020471	Pold2	-1.81257	5.8082	1.70982e-14	2.10283e-13
ENSMUSG00000038299	Wdr36	-1.5739	6.56669	1.71698e-14	2.10918e-13
ENSMUSG00000025025	Mxi1	2.31289	6.4404	1.73121e-14	2.12417e-13
ENSMUSG00000021079	Timm9	-2.4826	4.54668	1.73324e-14	2.12418e-13
ENSMUSG00000057788	Ddx49	-1.16678	5.94268	1.7486e-14	2.1405e-13
ENSMUSG00000003038	Hmgn2	1.49382	9.65483	1.7596e-14	2.15147e-13
ENSMUSG00000035382	Pcsk7	1.58272	5.87656	1.812e-14	2.21296e-13
ENSMUSG00000040940	Arhgef1	1.34315	8.05013	1.83843e-14	2.24263e-13
ENSMUSG00000020455	Trim11	1.37222	6.19898	1.85057e-14	2.25481e-13
ENSMUSG00000079084	Ccdc82	1.66702	6.37719	1.8579e-14	2.26113e-13
ENSMUSG00000043909	Trp53bp1	-1.903	5.48706	1.88721e-14	2.29414e-13
ENSMUSG00000039195	Bbln	3.25508	3.95897	1.89908e-14	2.3059e-13
ENSMUSG00000028717	Tal1	-2.71208	5.14212	1.90264e-14	2.30756e-13
ENSMUSG00000025068	Gsto1	-1.17328	6.92539	1.94381e-14	2.35463e-13
ENSMUSG00000111752	Gm38575	8.37509	-1.60841	1.94593e-14	2.35463e-13
ENSMUSG00000034156	Tspoap1	-2.2772	8.78743	1.94974e-14	2.35652e-13
ENSMUSG00000074182	Znhit6	-2.82724	4.30227	1.9878e-14	2.39976e-13
ENSMUSG00000042524	Sun2	1.73577	8.88029	1.99528e-14	2.40602e-13
ENSMUSG00000025477	Inpp5a	2.07862	4.517	2.0345e-14	2.45005e-13
ENSMUSG00000062825	Actg1	1.06232	10.1268	2.03646e-14	2.45005e-13
ENSMUSG00000025932	Eya1	-3.31846	3.83395	2.04426e-14	2.45662e-13
ENSMUSG00000029174	Tbc1d1	1.23317	5.99405	2.05391e-14	2.4654e-13
ENSMUSG00000059182	Skap2	1.65011	7.51413	2.09096e-14	2.507e-13
ENSMUSG00000030220	Arhgdib	1.47078	10.485	2.10451e-14	2.51809e-13
ENSMUSG00000025138	Sirt7	1.31702	6.38743	2.105e-14	2.51809e-13
ENSMUSG00000020160	Meis1	-6.05237	3.06104	2.11321e-14	2.52503e-13
ENSMUSG00000018697	Aatf	-2.33592	5.18822	2.14203e-14	2.55657e-13
ENSMUSG00000038213	Tapbpl	1.35395	4.93132	2.16608e-14	2.58097e-13
ENSMUSG00000030067	Foxp1	-1.54335	6.41312	2.1674e-14	2.58097e-13
ENSMUSG00000026496	Parp1	-1.97294	7.70798	2.19558e-14	2.61157e-13
ENSMUSG00000031103	Elf4	1.70622	6.98397	2.21487e-14	2.63153e-13
ENSMUSG00000031996	Aplp2	1.26795	6.5172	2.22962e-14	2.64606e-13
ENSMUSG00000046598	Bdh1	-2.22542	5.3304	2.23248e-14	2.64647e-13
ENSMUSG00000030268	Bcat1	-3.32273	4.35227	2.23512e-14	2.64661e-13
ENSMUSG00000031662	Snx20	2.40098	5.22584	2.25473e-14	2.66682e-13
ENSMUSG00000038517	Tbkbp1	1.67154	5.93602	2.26333e-14	2.67399e-13
ENSMUSG00000026796	Niban2	-2.13514	4.68768	2.33033e-14	2.75005e-13
ENSMUSG00000021123	Rdh12	5.42213	3.04128	2.36296e-14	2.78542e-13
ENSMUSG00000026603	Smyd2	-2.59548	4.93568	2.37186e-14	2.79279e-13
ENSMUSG00000023952	Gtpbp2	1.53851	6.3141	2.40287e-14	2.82613e-13
ENSMUSG00000028980	H6pd	1.18833	6.44837	2.43653e-14	2.86252e-13
ENSMUSG00000045362	Tnfrsf26	1.50808	5.3742	2.44261e-14	2.86325e-13
ENSMUSG00000067613	Krt83	9.13809	-1.57384	2.44261e-14	2.86325e-13
ENSMUSG00000033450	Tagap	4.66109	4.12156	2.44919e-14	2.86628e-13
ENSMUSG00000027900	Dram2	1.7493	4.86222	2.45065e-14	2.86628e-13
ENSMUSG00000029201	Ugdh	1.76872	5.96078	2.47682e-14	2.89366e-13
ENSMUSG00000028551	Cdkn2c	1.8363	4.74624	2.49934e-14	2.91673e-13
ENSMUSG00000035778	Ggta1	1.22287	6.54645	2.5097e-14	2.92556e-13
ENSMUSG00000003031	Cdkn1b	1.98562	6.33067	2.52338e-14	2.93825e-13
ENSMUSG00000001576	Ergic1	-1.6172	6.53271	2.57455e-14	2.99452e-13
ENSMUSG00000023015	Racgap1	1.05189	7.49865	2.58003e-14	2.995e-13
ENSMUSG00000018567	Gabarap	1.55557	8.04174	2.58066e-14	2.995e-13
ENSMUSG00000022191	Drosha	-1.37275	6.60152	2.59479e-14	3.00807e-13
ENSMUSG00000027984	Hadh	-1.85992	5.74223	2.60431e-14	3.01577e-13
ENSMUSG00000029247	Paics	-1.13408	8.53837	2.62573e-14	3.03457e-13
ENSMUSG00000026004	Kansl1l	-1.51989	4.72607	2.62667e-14	3.03457e-13
ENSMUSG00000028843	Sh3bgrl3	1.25352	8.20453	2.62921e-14	3.03457e-13
ENSMUSG00000056648	Hoxb8	2.00759	8.60115	2.66173e-14	3.06873e-13
ENSMUSG00000035165	Kcne3	-4.01099	2.97096	2.68011e-14	3.08654e-13
ENSMUSG00000037736	Limch1	-7.68319	-1.48903	2.76097e-14	3.17617e-13
ENSMUSG00000026627	Pacc1	-3.1408	3.86344	2.77383e-14	3.18748e-13
ENSMUSG00000039715	Dync2i2	-2.78971	3.39667	2.785e-14	3.19681e-13
ENSMUSG00000003824	Syce2	-1.55738	6.18787	2.8117e-14	3.22394e-13
ENSMUSG00000004996	Mri1	-2.47389	4.78917	2.82388e-14	3.23438e-13
ENSMUSG00000028458	Tesk1	-2.13319	3.48243	2.84494e-14	3.25494e-13
ENSMUSG00000027351	Spred1	-2.45643	5.08356	2.894e-14	3.30748e-13
ENSMUSG00000079557	Marchf2	1.6868	5.02416	2.89787e-14	3.3083e-13
ENSMUSG00000062867	Impdh2	-1.75647	7.90384	2.92412e-14	3.33464e-13
ENSMUSG00000073775	Kti12	-2.22335	4.74941	2.98224e-14	3.39724e-13
ENSMUSG00000024867	Pip5k1b	2.04911	4.30983	3.00154e-14	3.41551e-13
ENSMUSG00000062115	Rai1	-1.87132	6.23961	3.00761e-14	3.41871e-13
ENSMUSG00000044986	Tst	1.96244	4.67649	3.01709e-14	3.42538e-13
ENSMUSG00000027130	Slc12a6	1.40907	6.35555	3.02e-14	3.42538e-13
ENSMUSG00000034006	Slc66a2	1.90997	4.84583	3.03463e-14	3.43826e-13
ENSMUSG00000020476	Dbnl	0.976998	7.41353	3.04236e-14	3.44331e-13
ENSMUSG00000021094	Dhrs7	2.498	5.751	3.0557e-14	3.45469e-13
ENSMUSG00000022247	Brix1	-1.93826	6.16895	3.0925e-14	3.49253e-13
ENSMUSG00000003526	Prodh	-1.79634	4.56507	3.11995e-14	3.51975e-13
ENSMUSG00000039159	Ube2h	2.18015	5.34494	3.12451e-14	3.52111e-13
ENSMUSG00000062397	Zfp706	-1.16203	7.44319	3.14271e-14	3.53783e-13
ENSMUSG00000006273	Atp6v1b2	1.36844	7.84488	3.15863e-14	3.55194e-13
ENSMUSG00000052270	Fpr2	12.0259	-0.307733	3.16265e-14	3.55265e-13
ENSMUSG00000090164	BC035044	-1.74322	6.07788	3.28017e-14	3.68073e-13
ENSMUSG00000056708	Ier5	2.15471	3.98973	3.31856e-14	3.71983e-13
ENSMUSG00000028890	Mtf1	1.71104	5.99598	3.33531e-14	3.73462e-13
ENSMUSG00000056054	S100a8	5.30792	8.45192	3.4274e-14	3.83366e-13
ENSMUSG00000076441	Ass1	-3.92295	4.62062	3.43245e-14	3.83522e-13
ENSMUSG00000070348	Ccnd1	-7.93439	0.820665	3.46969e-14	3.8727e-13
ENSMUSG00000024317	Rnf138	-1.77925	5.34076	3.47488e-14	3.87438e-13
ENSMUSG00000020590	Snx13	1.4068	5.80928	3.48944e-14	3.88649e-13
ENSMUSG00000018446	C1qbp	-2.42928	7.02851	3.55434e-14	3.95359e-13
ENSMUSG00000028465	Tln1	1.00751	10.0574	3.55721e-14	3.95359e-13
ENSMUSG00000026047	Poglut2	-2.40422	4.6565	3.5969e-14	3.99348e-13
ENSMUSG00000040681	Hmgn1	-1.84821	6.45256	3.658e-14	4.05376e-13
ENSMUSG00000046865	Fbl	-2.32004	6.99615	3.65892e-14	4.05376e-13
ENSMUSG00000039501	Znfx1	2.72475	5.5357	3.6767e-14	4.06916e-13
ENSMUSG00000034218	Atm	-1.74203	5.91293	3.68286e-14	4.07169e-13
ENSMUSG00000041977	Arhgef11	1.73833	4.65814	3.69252e-14	4.07801e-13
ENSMUSG00000038910	Plcl2	1.74922	5.64509	3.70045e-14	4.07801e-13
ENSMUSG00000030047	Arhgap25	1.38063	6.02257	3.70147e-14	4.07801e-13
ENSMUSG00000025959	Klf7	3.09666	4.63915	3.70411e-14	4.07801e-13
ENSMUSG00000035268	Pkig	-1.27604	5.43838	3.76955e-14	4.14572e-13
ENSMUSG00000074151	Nlrc5	-3.4513	4.40993	3.81301e-14	4.18913e-13
ENSMUSG00000021486	Prelid1	1.45743	8.47195	3.89676e-14	4.27667e-13
ENSMUSG00000022582	Ly6g	9.64314	-0.747038	3.94078e-14	4.32047e-13
ENSMUSG00000109324	Prmt1	-1.76774	7.22767	3.96005e-14	4.33706e-13
ENSMUSG00000025511	Tspan4	-2.63031	4.56721	3.97248e-14	4.34517e-13
ENSMUSG00000022686	B3gnt5	-3.93631	2.37765	3.97573e-14	4.34517e-13
ENSMUSG00000020949	Fkbp3	-1.63174	6.8612	3.98196e-14	4.34745e-13
ENSMUSG00000069520	Tmem19	1.2798	5.01593	3.98632e-14	4.3477e-13
ENSMUSG00000030096	Slc6a6	1.52338	7.59169	4.05697e-14	4.41667e-13
ENSMUSG00000039936	Pik3cd	1.0448	7.74168	4.05797e-14	4.41667e-13
ENSMUSG00000037058	Paip2	-1.53884	7.39002	4.09895e-14	4.45665e-13
ENSMUSG00000042229	Rabif	1.35603	5.70432	4.11991e-14	4.47478e-13
ENSMUSG00000021696	Elovl7	2.46872	2.99794	4.12414e-14	4.47478e-13
ENSMUSG00000022309	Angpt1	-7.24676	5.57625	4.21332e-14	4.56683e-13
ENSMUSG00000015355	Cd48	-1.81615	5.20383	4.25503e-14	4.60727e-13
ENSMUSG00000025417	Pip4k2c	1.38225	6.0003	4.4304e-14	4.79222e-13
ENSMUSG00000005413	Hmox1	4.14259	4.63997	4.47092e-14	4.83107e-13
ENSMUSG00000025786	Zdhhc3	1.35145	7.54949	4.53929e-14	4.89991e-13
ENSMUSG00000025354	Dnajc14	1.32437	6.18499	4.54592e-14	4.90203e-13
ENSMUSG00000024613	Tcof1	-2.37644	6.56701	4.56362e-14	4.91129e-13
ENSMUSG00000050147	F2rl3	-4.24603	2.64438	4.56385e-14	4.91129e-13
ENSMUSG00000028057	Rit1	1.71706	4.40363	4.64388e-14	4.99229e-13
ENSMUSG00000028016	Ints12	1.67481	5.95983	4.65295e-14	4.99693e-13
ENSMUSG00000021036	Sptlc2	1.1257	7.20164	4.69416e-14	5.03603e-13
ENSMUSG00000018339	Gpx3	4.16959	2.80107	4.70805e-14	5.04578e-13
ENSMUSG00000030339	Ltbr	1.20479	5.79112	4.75468e-14	5.09056e-13
ENSMUSG00000022799	Arhgap31	1.90822	5.68988	4.78414e-14	5.11689e-13
ENSMUSG00000020988	L2hgdh	-2.19049	4.94899	4.80814e-14	5.13732e-13
ENSMUSG00000027678	Ncoa3	1.31218	6.60137	4.82112e-14	5.14595e-13
ENSMUSG00000029591	Ung	-2.07514	4.33162	4.8421e-14	5.1631e-13
ENSMUSG00000057440	Mpp7	1.47292	5.47772	4.85093e-14	5.16728e-13
ENSMUSG00000021733	Slc4a7	-1.57622	5.67309	4.90133e-14	5.21567e-13
ENSMUSG00000031824	6430548M08Rik	9.32025	2.85786	4.9164e-14	5.22642e-13
ENSMUSG00000025283	Sat1	2.44629	7.07174	4.99737e-14	5.30712e-13
ENSMUSG00000041954	Tnfrsf18	3.10688	2.75475	5.01774e-14	5.32337e-13
ENSMUSG00000033352	Map2k4	1.43919	7.03263	5.03747e-14	5.33891e-13
ENSMUSG00000022089	Bin3	2.08771	6.41753	5.08942e-14	5.38852e-13
ENSMUSG00000020451	Limk2	0.981074	6.35515	5.0975e-14	5.39165e-13
ENSMUSG00000024785	Rcl1	-3.24449	4.60319	5.14923e-14	5.44031e-13
ENSMUSG00000047735	Samd9l	4.03966	6.51587	5.15809e-14	5.44031e-13
ENSMUSG00000029922	Mkrn1	1.23758	5.38276	5.15905e-14	5.44031e-13
ENSMUSG00000036580	Spg20	-2.05178	4.10633	5.18777e-14	5.46511e-13
ENSMUSG00000038633	Degs1	2.54724	6.6629	5.19301e-14	5.46515e-13
ENSMUSG00000020598	Nrcam	-8.72616	-0.159995	5.2137e-14	5.48143e-13
ENSMUSG00000032120	C2cd2l	1.71498	4.35335	5.22289e-14	5.48561e-13
ENSMUSG00000031562	Dctd	-4.57559	3.84056	5.23647e-14	5.49341e-13
ENSMUSG00000054364	Rhob	1.75821	6.51222	5.24078e-14	5.49341e-13
ENSMUSG00000073676	Hspe1	-2.4001	6.88993	5.27557e-14	5.52436e-13
ENSMUSG00000045165	AI467606	2.12509	5.36867	5.32055e-14	5.56592e-13
ENSMUSG00000002881	Nab1	1.11498	6.28155	5.3363e-14	5.57683e-13
ENSMUSG00000041498	Kif14	1.44518	6.10801	5.35982e-14	5.59585e-13
ENSMUSG00000020818	Mfsd11	1.55346	5.02872	5.45262e-14	5.68618e-13
ENSMUSG00000056999	Ide	-1.63334	8.21247	5.45746e-14	5.68618e-13
ENSMUSG00000040693	Slco4c1	8.8611	-0.441054	5.46258e-14	5.68618e-13
ENSMUSG00000026987	Baz2b	1.38254	7.09537	5.47713e-14	5.69567e-13
ENSMUSG00000020780	Srp68	-1.11491	7.351	5.5084e-14	5.72252e-13
ENSMUSG00000031659	Adcy7	1.25379	7.95355	5.54369e-14	5.7535e-13
ENSMUSG00000000561	Wdr77	-2.00946	5.35989	5.57288e-14	5.77808e-13
ENSMUSG00000042626	Shc1	0.99687	7.02028	5.65131e-14	5.85362e-13
ENSMUSG00000019124	Scrn1	-7.70635	-1.53964	5.67943e-14	5.87695e-13
ENSMUSG00000030161	Gabarapl1	-1.31469	5.68093	5.72455e-14	5.91781e-13
ENSMUSG00000037815	Ctnna1	1.21306	6.89753	5.75578e-14	5.94424e-13
ENSMUSG00000021144	Mta1	-1.55036	6.01166	5.76252e-14	5.94536e-13
ENSMUSG00000057219	Armc7	2.15416	3.36708	5.92995e-14	6.1121e-13
ENSMUSG00000027306	Nusap1	1.53333	7.2907	6.00776e-14	6.18623e-13
ENSMUSG00000079594	Cstdc6	11.7708	0.600586	6.0223e-14	6.19513e-13
ENSMUSG00000043183	Simc1	-2.71584	3.08248	6.03665e-14	6.20381e-13
ENSMUSG00000057948	Unc13d	1.07668	6.7409	6.072e-14	6.23404e-13
ENSMUSG00000022538	Lsg1	-1.17687	6.06928	6.10021e-14	6.25689e-13
ENSMUSG00000002289	Angptl4	-3.92367	3.03055	6.16116e-14	6.31323e-13
ENSMUSG00000072683	Gm7457	7.62121	-2.41699	6.16999e-14	6.31612e-13
ENSMUSG00000020184	Mdm2	0.993033	6.45798	6.27345e-14	6.41577e-13
ENSMUSG00000024078	Ttc27	-3.10002	4.58469	6.30427e-14	6.44103e-13
ENSMUSG00000055024	Ep300	1.42768	7.75245	6.33642e-14	6.46758e-13
ENSMUSG00000028245	Nsmaf	-1.52537	5.83384	6.38066e-14	6.50642e-13
ENSMUSG00000020733	Slc9a3r1	1.34585	6.58462	6.40933e-14	6.52931e-13
ENSMUSG00000076533	Igkv4-90	-7.44486	-1.49474	6.45327e-14	6.5677e-13
ENSMUSG00000054008	Ndst1	1.52866	6.83487	6.46438e-14	6.57264e-13
ENSMUSG00000025239	Limd1	-1.85647	4.79135	6.47849e-14	6.58062e-13
ENSMUSG00000041324	Inhba	6.73758	3.86136	6.50746e-14	6.60366e-13
ENSMUSG00000028101	Pias3	1.61237	4.10319	6.61513e-14	6.70567e-13
ENSMUSG00000049300	Prmt6	-1.82241	4.71594	6.62076e-14	6.70567e-13
ENSMUSG00000054321	Taf4b	-3.60457	3.06171	6.73425e-14	6.81405e-13
ENSMUSG00000029455	Aldh2	1.49956	9.03645	6.75866e-14	6.83217e-13
ENSMUSG00000022186	Oxct1	-1.04714	7.88051	6.84185e-14	6.90961e-13
ENSMUSG00000022270	Retreg1	3.90693	3.63817	6.86744e-14	6.92879e-13
ENSMUSG00000115338	Pnp	1.60761	6.28793	6.94544e-14	7.00076e-13
ENSMUSG00000036985	Zdhhc9	1.70992	5.15004	6.98515e-14	7.03404e-13
ENSMUSG00000032883	Acsl3	-0.993543	6.20928	7.0329e-14	7.07534e-13
ENSMUSG00000029545	Acads	-1.45759	5.46686	7.126e-14	7.16215e-13
ENSMUSG00000030861	Acadsb	1.31059	5.60377	7.14904e-14	7.17843e-13
ENSMUSG00000057342	Sphk2	1.18105	5.85989	7.35097e-14	7.36896e-13
ENSMUSG00000047407	Tgif1	-2.93524	4.85885	7.35283e-14	7.36896e-13
ENSMUSG00000001416	Cct3	-1.78943	8.22561	7.37662e-14	7.38576e-13
ENSMUSG00000034111	Tmed8	1.91029	4.74535	7.43896e-14	7.4399e-13
ENSMUSG00000005534	Insr	1.83068	5.79157	7.44773e-14	7.4399e-13
ENSMUSG00000026955	Sapcd2	-1.67505	5.12101	7.45194e-14	7.4399e-13
ENSMUSG00000047139	Cd24a	3.23281	5.59123	7.47815e-14	7.45897e-13
ENSMUSG00000035992	Fnip1	1.71931	6.70727	7.51486e-14	7.48848e-13
ENSMUSG00000004446	Bid	-1.31206	6.58973	7.54531e-14	7.5117e-13
ENSMUSG00000070319	Eif3g	-1.46924	6.99007	7.56436e-14	7.52353e-13
ENSMUSG00000044700	Tmem201	-2.56307	4.46685	7.63749e-14	7.58908e-13
ENSMUSG00000021814	Anxa7	1.12404	6.98556	7.654e-14	7.59829e-13
ENSMUSG00000022664	Slc35a5	2.7734	4.98903	7.78648e-14	7.72251e-13
ENSMUSG00000032020	Ubash3b	1.83025	5.56958	7.81341e-14	7.74191e-13
ENSMUSG00000006304	Arpc2	1.09423	9.1048	7.83171e-14	7.75051e-13
ENSMUSG00000033499	Larp4b	1.35249	7.5689	7.83708e-14	7.75051e-13
ENSMUSG00000027533	Fabp5	-2.30824	4.62523	7.84422e-14	7.75051e-13
ENSMUSG00000027995	Tlr2	5.69466	3.77185	7.86084e-14	7.75963e-13
ENSMUSG00000019188	H13	-0.977327	7.69635	7.87478e-14	7.76084e-13
ENSMUSG00000009376	Met	-2.80247	5.08435	7.87685e-14	7.76084e-13
ENSMUSG00000017670	Elmo2	1.00052	6.71914	7.92097e-14	7.797e-13
ENSMUSG00000020255	Nopchap1	-1.86982	5.63077	7.94222e-14	7.8106e-13
ENSMUSG00000034445	Cyb561a3	1.92804	6.25638	8.00742e-14	7.86735e-13
ENSMUSG00000018428	Akap1	-3.70816	4.07995	8.07754e-14	7.92882e-13
ENSMUSG00000024621	Csf1r	3.78172	3.31381	8.10547e-14	7.94881e-13
ENSMUSG00000113669	Gm36723	8.10917	-1.86481	8.12255e-14	7.95813e-13
ENSMUSG00000024122	Pdpk1	1.2226	6.63332	8.32886e-14	8.14632e-13
ENSMUSG00000046027	Stard5	2.60255	3.70189	8.33015e-14	8.14632e-13
ENSMUSG00000032515	Csrnp1	2.13915	4.30319	8.35089e-14	8.15902e-13
ENSMUSG00000069893	9930111J21Rik1	4.49184	1.34821	8.3885e-14	8.18815e-13
ENSMUSG00000045216	Hs6st1	-3.14533	3.78567	8.42449e-14	8.20833e-13
ENSMUSG00000050965	Prkca	-3.11919	4.53606	8.43239e-14	8.20833e-13
ENSMUSG00000028528	Dnajc6	-2.74676	4.00196	8.43263e-14	8.20833e-13
ENSMUSG00000032560	Dnajc13	1.32904	7.52882	8.44405e-14	8.21183e-13
ENSMUSG00000059878	Zfp422	-1.08639	6.98867	8.46778e-14	8.2273e-13
ENSMUSG00000020534	Shmt1	-1.82265	6.45577	8.49244e-14	8.23767e-13
ENSMUSG00000039206	Daglb	1.59689	4.72522	8.49415e-14	8.23767e-13
ENSMUSG00000029716	Tfr2	-2.5676	4.38986	8.54668e-14	8.28098e-13
ENSMUSG00000039057	Myo16	-8.4938	0.0834803	8.6416e-14	8.36523e-13
ENSMUSG00000049804	Armcx4	-5.5903	3.76972	8.7871e-14	8.49824e-13
ENSMUSG00000034194	R3hcc1	-2.86185	3.57313	8.80681e-14	8.50947e-13
ENSMUSG00000036712	Cyld	1.22037	6.3717	8.88033e-14	8.57262e-13
ENSMUSG00000032185	Carm1	-1.89595	5.65489	8.91596e-14	8.59426e-13
ENSMUSG00000052102	Gnpda1	1.70492	5.60923	8.91911e-14	8.59426e-13
ENSMUSG00000029177	Cenpa	1.01097	7.30742	8.95113e-14	8.61721e-13
ENSMUSG00000031828	Klhl36	2.46452	3.43221	9.01951e-14	8.67508e-13
ENSMUSG00000029338	Antxr2	1.82821	5.4438	9.08384e-14	8.72897e-13
ENSMUSG00000019873	Reep3	1.68404	5.58882	9.10266e-14	8.73241e-13
ENSMUSG00000031207	Msn	1.09111	9.23213	9.10406e-14	8.73241e-13
ENSMUSG00000022125	Cln5	1.44116	6.14847	9.11735e-14	8.73718e-13
ENSMUSG00000005161	Prdx2	-1.11731	6.84522	9.19734e-14	8.8058e-13
ENSMUSG00000025995	Wdr75	-2.40264	5.95303	9.21676e-14	8.81636e-13
ENSMUSG00000087366	Junos	4.85693	1.19971	9.23373e-14	8.82456e-13
ENSMUSG00000051498	Tlr6	2.58399	2.56515	9.27332e-14	8.85434e-13
ENSMUSG00000021957	Tkt	0.920629	10.1366	9.30743e-14	8.87883e-13
ENSMUSG00000116380	Gm39556	2.32211	2.29036	9.35391e-14	8.91507e-13
ENSMUSG00000055782	Abcd2	2.60657	6.08111	9.3818e-14	8.93355e-13
ENSMUSG00000087590	Epb41l4aos	-2.53813	3.18866	9.43772e-14	8.97866e-13
ENSMUSG00000049103	Ccr2	-4.00975	7.37426	9.5794e-14	9.1052e-13
ENSMUSG00000002812	Flii	0.954927	7.71762	9.68418e-14	9.19647e-13
ENSMUSG00000059479	B3gnt8	1.49695	4.61265	9.70184e-14	9.20295e-13
ENSMUSG00000014907	Naf1	-2.57598	5.09936	9.70853e-14	9.20295e-13
ENSMUSG00000021692	Dimt1	-2.19957	3.77745	9.86738e-14	9.3451e-13
ENSMUSG00000039934	Gsap	4.15619	3.66155	9.90588e-14	9.37311e-13
ENSMUSG00000037622	Wdtc1	1.1985	5.66288	9.92131e-14	9.37925e-13
ENSMUSG00000061286	Exosc5	-1.53601	6.08907	9.96231e-14	9.40383e-13
ENSMUSG00000025584	Pde8a	2.29494	4.72549	9.97149e-14	9.40383e-13
ENSMUSG00000034613	Ppm1h	1.61378	5.49565	9.97417e-14	9.40383e-13
ENSMUSG00000032812	Arap1	1.30839	7.05025	1.00463e-13	9.46338e-13
ENSMUSG00000041438	Utp4	-2.27602	6.00741	1.0105e-13	9.51016e-13
ENSMUSG00000060261	Gtf2i	-1.2804	7.90716	1.01268e-13	9.52208e-13
ENSMUSG00000025804	Ccr1	8.65528	4.15102	1.02235e-13	9.6044e-13
ENSMUSG00000032870	Smap2	1.55813	5.74435	1.026e-13	9.63005e-13
ENSMUSG00000031422	Morf4l2	-0.876255	7.93717	1.03414e-13	9.69787e-13
ENSMUSG00000027189	Trim44	-1.54407	6.85373	1.04912e-13	9.82954e-13
ENSMUSG00000021770	Samd8	2.00813	4.6444	1.05149e-13	9.84298e-13
ENSMUSG00000061024	Rrs1	-1.98055	6.18181	1.06308e-13	9.94255e-13
ENSMUSG00000025314	Ptprj	2.95301	3.66572	1.06519e-13	9.95346e-13
ENSMUSG00000029036	Atad3a	-2.94614	5.70478	1.06777e-13	9.96874e-13
ENSMUSG00000046718	Bst2	-1.87178	4.13761	1.07137e-13	9.99344e-13
ENSMUSG00000074212	Dnajb14	1.30702	5.20635	1.0777e-13	1.00435e-12
ENSMUSG00000029128	Rab28	1.42191	5.764	1.08221e-13	1.00766e-12
ENSMUSG00000038697	Taf5l	-1.25408	5.57625	1.0856e-13	1.00993e-12
ENSMUSG00000020691	Mettl2	-2.04959	4.39442	1.0911e-13	1.01414e-12
ENSMUSG00000030102	Itpr1	-1.61592	6.63388	1.09287e-13	1.01489e-12
ENSMUSG00000025355	Mmp19	1.74776	4.44504	1.09828e-13	1.01902e-12
ENSMUSG00000042724	Map3k9	8.0756	0.517546	1.10193e-13	1.0215e-12
ENSMUSG00000020496	Rnf187	-1.35701	6.60861	1.10755e-13	1.0258e-12
ENSMUSG00000042507	Mideas	1.12769	5.87024	1.10902e-13	1.02626e-12
ENSMUSG00000055541	Lair1	2.15484	5.61802	1.11109e-13	1.02672e-12
ENSMUSG00000022346	Myc	-3.45281	6.7908	1.11147e-13	1.02672e-12
ENSMUSG00000063193	Cd300lb	3.52541	4.9864	1.11354e-13	1.02773e-12
ENSMUSG00000036435	Exoc1	1.21736	6.53282	1.11687e-13	1.02989e-12
ENSMUSG00000001865	Cpa3	-2.90536	8.93645	1.13439e-13	1.04514e-12
ENSMUSG00000047221	Fam185a	-2.58956	3.49432	1.14142e-13	1.05069e-12
ENSMUSG00000097589	Dleu2	1.6456	5.30468	1.14674e-13	1.05466e-12
ENSMUSG00000041920	Slc16a6	1.19451	7.39276	1.15276e-13	1.05864e-12
ENSMUSG00000036371	Serbp1	-1.12335	9.50282	1.15309e-13	1.05864e-12
ENSMUSG00000027722	Spata5	-1.93609	4.78229	1.15647e-13	1.06082e-12
ENSMUSG00000030103	Bhlhe40	3.32803	5.98674	1.16745e-13	1.06995e-12
ENSMUSG00000032320	Rcn2	-1.50169	4.73341	1.19056e-13	1.09019e-12
ENSMUSG00000039096	Rsad1	-4.81664	1.96142	1.21528e-13	1.11185e-12
ENSMUSG00000022105	Rb1	1.66968	6.209	1.21949e-13	1.11444e-12
ENSMUSG00000023018	Smarcd1	-1.32677	5.25963	1.22022e-13	1.11444e-12
ENSMUSG00000024851	Pitpnm1	1.6153	6.39068	1.22537e-13	1.11741e-12
ENSMUSG00000026664	Phyh	1.83925	4.35278	1.22561e-13	1.11741e-12
ENSMUSG00000056515	Rab31	1.20048	7.35058	1.22901e-13	1.11954e-12
ENSMUSG00000031482	Slc25a15	-2.46607	4.292	1.23197e-13	1.12101e-12
ENSMUSG00000022119	Rbm26	-1.15494	6.31573	1.23275e-13	1.12101e-12
ENSMUSG00000037523	Mavs	-1.76864	4.19699	1.23531e-13	1.12235e-12
ENSMUSG00000056820	Tsnax	-1.07436	6.37466	1.24537e-13	1.13052e-12
ENSMUSG00000040296	Ddx58	2.47767	4.96411	1.24989e-13	1.13364e-12
ENSMUSG00000040659	Efhd2	1.47403	6.98367	1.25177e-13	1.13437e-12
ENSMUSG00000029014	Dnajc2	-1.46761	7.1113	1.26606e-13	1.14633e-12
ENSMUSG00000060166	Zdhhc8	-3.2077	3.06764	1.26912e-13	1.14811e-12
ENSMUSG00000052013	Btla	-4.18878	4.50941	1.27054e-13	1.1484e-12
ENSMUSG00000036553	Sh3tc1	2.93393	3.91749	1.27285e-13	1.14951e-12
ENSMUSG00000004677	Myo9b	1.07158	7.73165	1.27528e-13	1.15071e-12
ENSMUSG00000022476	Polr3h	-2.19079	4.39307	1.28236e-13	1.1561e-12
ENSMUSG00000015970	Chdh	-2.24309	5.25099	1.29176e-13	1.16358e-12
ENSMUSG00000000876	Pxmp4	1.87436	4.9089	1.30885e-13	1.17613e-12
ENSMUSG00000109036	2210406H18Rik	3.03027	2.90064	1.30963e-13	1.17613e-12
ENSMUSG00000020440	Arf5	1.24304	5.7589	1.31e-13	1.17613e-12
ENSMUSG00000024513	Mbd2	1.39257	6.84707	1.31017e-13	1.17613e-12
ENSMUSG00000026893	Gca	2.47957	6.71559	1.3184e-13	1.18251e-12
ENSMUSG00000039254	Pomt1	-1.4911	5.17859	1.32018e-13	1.1831e-12
ENSMUSG00000056091	St3gal5	3.58313	4.55108	1.33267e-13	1.19326e-12
ENSMUSG00000004880	Lbr	1.09188	8.61755	1.33919e-13	1.19808e-12
ENSMUSG00000043091	Tuba1c	1.4158	7.80729	1.35726e-13	1.21321e-12
ENSMUSG00000056529	Ptafr	1.39767	5.8123	1.35938e-13	1.21408e-12
ENSMUSG00000037493	Cib2	7.8929	-1.06674	1.39059e-13	1.2409e-12
ENSMUSG00000028292	Rars2	-1.15905	5.37243	1.39386e-13	1.24276e-12
ENSMUSG00000020644	Id2	6.66597	3.74591	1.39538e-13	1.24306e-12
ENSMUSG00000050549	Fam241a	3.87174	2.34007	1.39798e-13	1.24353e-12
ENSMUSG00000000804	Usp32	1.50389	5.83161	1.39828e-13	1.24353e-12
ENSMUSG00000052477	C130026I21Rik	3.3967	2.59201	1.40218e-13	1.24595e-12
ENSMUSG00000036661	Dennd3	2.61033	4.77035	1.40639e-13	1.24863e-12
ENSMUSG00000041650	Pcca	-1.29448	5.22354	1.41437e-13	1.25466e-12
ENSMUSG00000026883	Dab2ip	-2.83563	3.86962	1.43486e-13	1.2702e-12
ENSMUSG00000029185	Fam114a1	2.56349	2.66661	1.43548e-13	1.2702e-12
ENSMUSG00000028776	Tinagl1	3.20386	3.49921	1.43553e-13	1.2702e-12
ENSMUSG00000034647	Ankrd12	1.11249	6.63539	1.44277e-13	1.27554e-12
ENSMUSG00000040111	Gramd1b	1.70512	6.09163	1.44573e-13	1.27708e-12
ENSMUSG00000024045	Akap8	-1.01046	7.29586	1.45172e-13	1.2813e-12
ENSMUSG00000051314	Ffar2	4.31697	4.51913	1.45787e-13	1.28564e-12
ENSMUSG00000020493	Prr11	1.34558	6.80198	1.46279e-13	1.28802e-12
ENSMUSG00000014867	Surf4	0.885999	8.80261	1.46302e-13	1.28802e-12
ENSMUSG00000012117	Dhdds	1.10412	6.61185	1.48008e-13	1.30089e-12
ENSMUSG00000009535	Rnmt	-1.07395	6.62044	1.48012e-13	1.30089e-12
ENSMUSG00000063286	Gvin-ps7	1.73037	6.87964	1.50187e-13	1.31891e-12
ENSMUSG00000024404	Riok3	1.33633	7.79093	1.50381e-13	1.31951e-12
ENSMUSG00000021182	Ccdc88c	1.34666	7.20047	1.50833e-13	1.32237e-12
ENSMUSG00000028672	Hmgcl	1.19314	5.30959	1.53061e-13	1.34078e-12
ENSMUSG00000055407	Map6	9.17552	-0.769611	1.54827e-13	1.35512e-12
ENSMUSG00000030811	Fbxl19	-1.41082	5.12291	1.55994e-13	1.36324e-12
ENSMUSG00000036943	Rab8b	1.46736	7.28383	1.56014e-13	1.36324e-12
ENSMUSG00000022178	Ajuba	-3.38858	2.81674	1.56358e-13	1.36511e-12
ENSMUSG00000060098	Prmt7	-2.62029	5.19383	1.58489e-13	1.38256e-12
ENSMUSG00000026618	Iars2	-1.1796	6.90186	1.59745e-13	1.3907e-12
ENSMUSG00000036257	Pnpla8	1.80014	5.97577	1.59789e-13	1.3907e-12
ENSMUSG00000020198	Ap3d1	0.974502	7.59595	1.59819e-13	1.3907e-12
ENSMUSG00000030579	Tyrobp	2.15803	7.70197	1.61174e-13	1.40133e-12
ENSMUSG00000042210	Abhd14a	-3.10396	3.75163	1.62027e-13	1.40758e-12
ENSMUSG00000026974	Zmynd19	-1.67619	5.49989	1.63509e-13	1.41929e-12
ENSMUSG00000019843	Fyn	-2.42128	4.05149	1.64622e-13	1.42777e-12
ENSMUSG00000026027	Stradb	1.21064	5.18128	1.64971e-13	1.42962e-12
ENSMUSG00000020766	Galk1	-1.4283	5.92293	1.67251e-13	1.44818e-12
ENSMUSG00000039193	Nlrc4	2.82539	3.41638	1.68241e-13	1.45555e-12
ENSMUSG00000037628	Cdkn3	2.31111	5.25078	1.70095e-13	1.46958e-12
ENSMUSG00000027519	Rab22a	1.18186	5.79547	1.70143e-13	1.46958e-12
ENSMUSG00000040195	Nemp1	1.08396	5.97167	1.71028e-13	1.47601e-12
ENSMUSG00000025364	Pa2g4	-1.7838	8.82092	1.71251e-13	1.47601e-12
ENSMUSG00000021557	Agtpbp1	1.13395	6.08303	1.71309e-13	1.47601e-12
ENSMUSG00000039917	Rhbdd2	-1.8984	4.50428	1.72626e-13	1.48614e-12
ENSMUSG00000026786	Apbb1ip	1.14682	7.70919	1.73818e-13	1.49518e-12
ENSMUSG00000023903	Mmp25	8.07486	-2.29168	1.75633e-13	1.50955e-12
ENSMUSG00000043939	A530064D06Rik	10.0466	0.209568	1.77049e-13	1.52048e-12
ENSMUSG00000020918	Kat2a	-2.49532	5.7919	1.79181e-13	1.53717e-12
ENSMUSG00000025154	Arhgap19	1.30667	7.74569	1.79285e-13	1.53717e-12
ENSMUSG00000034708	Grn	2.13883	8.30668	1.81284e-13	1.55304e-12
ENSMUSG00000042616	Oscp1	2.75308	3.24259	1.82038e-13	1.55823e-12
ENSMUSG00000016756	Cmah	9.50876	1.39624	1.8278e-13	1.56283e-12
ENSMUSG00000042460	C1galt1	1.4226	6.14202	1.82875e-13	1.56283e-12
ENSMUSG00000021796	Bmpr1a	1.2501	6.1354	1.83022e-13	1.56283e-12
ENSMUSG00000069539	Scyl2	1.31921	6.03398	1.86388e-13	1.59028e-12
ENSMUSG00000032078	Zpr1	-1.31288	5.8031	1.87018e-13	1.59436e-12
ENSMUSG00000019777	Hdac2	-1.12429	6.97191	1.8811e-13	1.60237e-12
ENSMUSG00000000530	Acvrl1	7.96301	-0.0622268	1.89743e-13	1.61497e-12
ENSMUSG00000038534	Osbpl7	1.0949	5.28647	1.92587e-13	1.63785e-12
ENSMUSG00000031309	Rps6ka3	1.14783	8.15415	1.9372e-13	1.64615e-12
ENSMUSG00000034403	Pja1	-1.73101	4.38863	1.94992e-13	1.65562e-12
ENSMUSG00000031355	Arhgap6	-4.33057	4.32609	1.95851e-13	1.66157e-12
ENSMUSG00000034875	Nudt19	-1.61242	5.23144	1.97537e-13	1.67452e-12
ENSMUSG00000023473	Celsr3	1.47908	4.85928	1.98162e-13	1.67846e-12
ENSMUSG00000060477	Irak2	2.85749	3.81053	1.98826e-13	1.68273e-12
ENSMUSG00000020546	Stxbp4	-2.99472	3.31615	2.00482e-13	1.69538e-12
ENSMUSG00000037661	Gpr160	1.24648	5.92362	2.02569e-13	1.71165e-12
ENSMUSG00000024789	Jak2	1.66404	6.56432	2.0482e-13	1.72928e-12
ENSMUSG00000021048	Mthfd1	-2.09808	6.77058	2.07389e-13	1.74956e-12
ENSMUSG00000035024	Ncapd3	0.912955	7.44356	2.09188e-13	1.76332e-12
ENSMUSG00000022407	Adsl	-1.83768	6.4744	2.09527e-13	1.76477e-12
ENSMUSG00000025980	Hspd1	-2.21218	8.99794	2.10822e-13	1.77425e-12
ENSMUSG00000047045	Tmem164	1.12424	7.05911	2.12249e-13	1.78483e-12
ENSMUSG00000029998	Pcyox1	1.00981	6.68873	2.1351e-13	1.79399e-12
ENSMUSG00000037904	Ankrd9	3.02291	2.66139	2.13865e-13	1.79555e-12
ENSMUSG00000040785	Ttc3	-1.76121	6.20518	2.16914e-13	1.81968e-12
ENSMUSG00000020657	Dnajc27	-2.18074	3.53137	2.20357e-13	1.8471e-12
ENSMUSG00000028497	Hacd4	4.03704	4.94823	2.22265e-13	1.86126e-12
ENSMUSG00000021838	Samd4	-10.8186	0.277463	2.22402e-13	1.86126e-12
ENSMUSG00000036833	Pnpla7	1.81306	6.5744	2.23173e-13	1.86623e-12
ENSMUSG00000025076	Casp7	1.36791	5.76751	2.24326e-13	1.87438e-12
ENSMUSG00000021646	Mccc2	-1.96167	3.55986	2.27166e-13	1.8966e-12
ENSMUSG00000057421	Las1l	-2.01317	5.99408	2.27545e-13	1.89826e-12
ENSMUSG00000017929	B4galt5	1.975	5.13622	2.30118e-13	1.91819e-12
ENSMUSG00000031378	Abcd1	0.939915	6.4714	2.34264e-13	1.95121e-12
ENSMUSG00000041912	Tdrkh	-1.5462	4.02939	2.34876e-13	1.95476e-12
ENSMUSG00000020328	Nudcd2	-1.44385	6.39826	2.35627e-13	1.95946e-12
ENSMUSG00000020079	Supv3l1	-1.70733	4.98302	2.35883e-13	1.96003e-12
ENSMUSG00000033706	Smyd5	-3.35187	4.65057	2.36455e-13	1.96274e-12
ENSMUSG00000064128	Cenpj	1.4641	5.61724	2.36582e-13	1.96274e-12
ENSMUSG00000026980	Ly75	3.9389	0.943709	2.3843e-13	1.9765e-12
ENSMUSG00000016256	Ctsz	0.967546	7.3708	2.39493e-13	1.98375e-12
ENSMUSG00000102918	Pcdhgc3	-2.08652	4.03522	2.39883e-13	1.98541e-12
ENSMUSG00000030662	Ipo5	-1.37479	8.33405	2.41199e-13	1.99473e-12
ENSMUSG00000026435	Slc45a3	-5.91407	4.06863	2.43353e-13	2.01097e-12
ENSMUSG00000027430	Dtd1	-2.11202	4.42043	2.45278e-13	2.02528e-12
ENSMUSG00000031976	Urb2	-1.93973	5.75597	2.47407e-13	2.04125e-12
ENSMUSG00000029778	Adcyap1r1	-6.13378	2.31465	2.48798e-13	2.05112e-12
ENSMUSG00000111167	Gm39321	7.97346	-1.79462	2.49284e-13	2.05351e-12
ENSMUSG00000026675	Hsd17b7	2.33857	5.81637	2.50572e-13	2.06166e-12
ENSMUSG00000026068	Il18rap	2.14457	7.40221	2.50665e-13	2.06166e-12
ENSMUSG00000026879	Gsn	4.40803	6.6925	2.55949e-13	2.10347e-12
ENSMUSG00000024187	Fam234a	2.38115	3.39994	2.56632e-13	2.10743e-12
ENSMUSG00000112148	Lilrb4a	10.4839	3.52908	2.57957e-13	2.11666e-12
ENSMUSG00000038628	Polr3k	-1.29606	5.84812	2.58406e-13	2.11868e-12
ENSMUSG00000032212	Sltm	-0.874389	7.24564	2.58666e-13	2.11917e-12
ENSMUSG00000058997	Vwa8	-1.38887	5.54785	2.59643e-13	2.12534e-12
ENSMUSG00000015053	Gata2	-3.6668	5.72011	2.59825e-13	2.12534e-12
ENSMUSG00000035378	Shq1	-2.02124	3.68901	2.60235e-13	2.12704e-12
ENSMUSG00000022009	Nufip1	-1.53257	4.83622	2.60886e-13	2.12958e-12
ENSMUSG00000024431	Nr3c1	1.32487	6.9387	2.60951e-13	2.12958e-12
ENSMUSG00000016087	Fli1	1.36558	6.592	2.6163e-13	2.13346e-12
ENSMUSG00000028690	Mmachc	-2.70516	3.86786	2.62608e-13	2.13978e-12
ENSMUSG00000003868	Ruvbl2	-1.49865	7.16157	2.63323e-13	2.14356e-12
ENSMUSG00000020387	Jade2	-1.93055	4.55361	2.63481e-13	2.14356e-12
ENSMUSG00000042613	Pbxip1	1.88495	6.6388	2.64057e-13	2.14659e-12
ENSMUSG00000027312	Atrn	1.54609	7.85319	2.64506e-13	2.14857e-12
ENSMUSG00000073529	F830208F22Rik	3.59912	1.32331	2.6487e-13	2.14987e-12
ENSMUSG00000061119	Prcp	-2.00024	5.17497	2.66858e-13	2.16433e-12
ENSMUSG00000027763	Mbnl1	1.14813	8.62874	2.70969e-13	2.19598e-12
ENSMUSG00000045551	Fpr1	10.868	-0.744173	2.72671e-13	2.20729e-12
ENSMUSG00000027660	Skil	1.72931	4.5938	2.72986e-13	2.20729e-12
ENSMUSG00000060733	Ipmk	0.895412	6.55064	2.72996e-13	2.20729e-12
ENSMUSG00000068039	Tcp1	-1.03055	9.15711	2.7325e-13	2.20765e-12
ENSMUSG00000031145	Prickle3	3.45707	1.97779	2.7504e-13	2.22041e-12
ENSMUSG00000048787	Dcun1d3	2.38192	3.30332	2.75698e-13	2.22401e-12
ENSMUSG00000035834	Polr3g	-1.81992	4.47139	2.76645e-13	2.22993e-12
ENSMUSG00000029587	Zfp12	-1.96185	3.57806	2.79722e-13	2.25262e-12
ENSMUSG00000058881	Zfp516	1.9501	6.00389	2.79889e-13	2.25262e-12
ENSMUSG00000035754	Wdr18	-2.17313	5.92632	2.80435e-13	2.25529e-12
ENSMUSG00000025050	Pcgf6	-2.1251	4.35362	2.85844e-13	2.29703e-12
ENSMUSG00000035621	Midn	1.16245	6.87018	2.87781e-13	2.31083e-12
ENSMUSG00000030172	Erc1	1.22063	4.94069	2.88363e-13	2.31293e-12
ENSMUSG00000009207	Lnpk	1.37404	6.32887	2.88483e-13	2.31293e-12
ENSMUSG00000061533	Cep128	1.01193	6.74019	2.89043e-13	2.31565e-12
ENSMUSG00000044502	Bod1	-1.84483	3.62372	2.89868e-13	2.32049e-12
ENSMUSG00000034663	Bmp2k	1.59208	5.42694	2.90719e-13	2.32553e-12
ENSMUSG00000018169	Mfng	-1.44528	4.82735	2.95927e-13	2.36539e-12
ENSMUSG00000010392	Gosr1	0.970074	5.91376	2.98098e-13	2.38093e-12
ENSMUSG00000013629	Cad	-2.64972	7.17612	2.99133e-13	2.38738e-12
ENSMUSG00000027602	Map1lc3a	2.71776	3.18995	3.00251e-13	2.39449e-12
ENSMUSG00000036686	Cc2d1a	1.22366	4.77184	3.03771e-13	2.42072e-12
ENSMUSG00000038838	Vars2	-1.71612	4.62277	3.05114e-13	2.42958e-12
ENSMUSG00000020775	Mrpl38	-2.18182	4.7431	3.05813e-13	2.43119e-12
ENSMUSG00000037318	Traf3ip3	1.05556	6.72818	3.05952e-13	2.43119e-12
ENSMUSG00000024369	Nelfe	1.08078	6.49511	3.06011e-13	2.43119e-12
ENSMUSG00000026558	Uck2	-1.16117	7.57586	3.07193e-13	2.43873e-12
ENSMUSG00000027082	Tfpi	-2.81853	4.86719	3.08614e-13	2.44817e-12
ENSMUSG00000046722	Cdc42se1	1.06884	7.33665	3.09272e-13	2.45153e-12
ENSMUSG00000059810	Rgs3	3.76882	2.49553	3.15877e-13	2.50201e-12
ENSMUSG00000071379	Hpcal1	1.38072	5.89636	3.18009e-13	2.51699e-12
ENSMUSG00000085385	Snhg17	-2.97864	4.54255	3.18512e-13	2.51908e-12
ENSMUSG00000078771	Evi2a	2.59867	4.90655	3.20208e-13	2.53058e-12
ENSMUSG00000059995	Atxn7l3	0.864437	6.79855	3.22478e-13	2.5466e-12
ENSMUSG00000025869	Nop16	-2.50637	5.51532	3.23988e-13	2.55661e-12
ENSMUSG00000036246	Gmip	1.12768	7.5142	3.29036e-13	2.59449e-12
ENSMUSG00000005148	Klf5	7.75283	0.138627	3.30685e-13	2.60554e-12
ENSMUSG00000031652	N4bp1	1.46559	6.66197	3.31538e-13	2.6103e-12
ENSMUSG00000027559	Car3	-5.6079	2.03142	3.32615e-13	2.61585e-12
ENSMUSG00000035203	Epn1	0.958187	6.8269	3.32741e-13	2.61585e-12
ENSMUSG00000025962	Fastkd2	-2.01008	4.93387	3.36316e-13	2.64198e-12
ENSMUSG00000019969	Psen1	0.998081	7.33331	3.37139e-13	2.64647e-12
ENSMUSG00000052512	Nav2	-2.51945	3.65375	3.37554e-13	2.64658e-12
ENSMUSG00000032643	Fhl3	1.21864	5.14647	3.37658e-13	2.64658e-12
ENSMUSG00000029449	Rhof	2.07481	4.49058	3.39126e-13	2.65561e-12
ENSMUSG00000090290	Tarbp1	-2.80648	3.84711	3.39315e-13	2.65561e-12
ENSMUSG00000020034	Tcp11l2	2.95456	5.58005	3.41168e-13	2.66812e-12
ENSMUSG00000031513	Leprotl1	0.967424	6.19538	3.42088e-13	2.67333e-12
ENSMUSG00000047875	Gpr157	3.31499	1.82616	3.42421e-13	2.67394e-12
ENSMUSG00000025232	Hexa	0.974467	7.54745	3.42787e-13	2.67481e-12
ENSMUSG00000021583	Erap1	-1.12485	6.82525	3.4314e-13	2.67558e-12
ENSMUSG00000032423	Syncrip	-1.3311	7.89814	3.4445e-13	2.6838e-12
ENSMUSG00000047888	Tnrc6b	1.76087	6.37632	3.47488e-13	2.70546e-12
ENSMUSG00000021466	Ptch1	-1.91333	4.9329	3.54061e-13	2.75328e-12
ENSMUSG00000053477	Tcf4	-2.52499	4.32662	3.54154e-13	2.75328e-12
ENSMUSG00000029916	Agk	-1.55401	4.52405	3.57167e-13	2.77465e-12
ENSMUSG00000041468	Gpr12	-10.1935	-0.261038	3.58903e-13	2.78608e-12
ENSMUSG00000046794	Ppp1r3b	3.89201	4.04724	3.62338e-13	2.81066e-12
ENSMUSG00000089726	Mir17hg	-3.063	4.78794	3.63621e-13	2.8181e-12
ENSMUSG00000025139	Tollip	1.13176	6.76699	3.63833e-13	2.8181e-12
ENSMUSG00000019947	Arid5b	1.47885	4.61222	3.68939e-13	2.85554e-12
ENSMUSG00000034189	Hsdl1	1.14268	5.66179	3.70346e-13	2.86432e-12
ENSMUSG00000027379	Bub1	0.899377	7.66268	3.74306e-13	2.89282e-12
ENSMUSG00000020706	Ftsj3	-1.97829	6.80806	3.75892e-13	2.90127e-12
ENSMUSG00000001942	Siae	-2.16685	5.76631	3.75952e-13	2.90127e-12
ENSMUSG00000064289	Tank	1.32905	6.44779	3.77807e-13	2.91344e-12
ENSMUSG00000038546	Ranbp9	1.09402	6.60031	3.8126e-13	2.93791e-12
ENSMUSG00000035443	Thyn1	-1.77947	5.66243	3.84929e-13	2.96401e-12
ENSMUSG00000060227	Golm2	-4.44835	0.797392	3.87076e-13	2.97836e-12
ENSMUSG00000041360	Pum3	-1.39815	6.87991	3.88461e-13	2.98683e-12
ENSMUSG00000027185	Nat10	-3.20531	5.68422	3.89087e-13	2.98945e-12
ENSMUSG00000031948	Kars	-1.21642	7.92391	3.90771e-13	3.0002e-12
ENSMUSG00000039449	Prpf18	0.973425	6.26951	3.91414e-13	3.00294e-12
ENSMUSG00000078137	Ankrd63	-1.59794	4.80875	3.95964e-13	3.03563e-12
ENSMUSG00000019810	Fuca2	1.14232	7.6386	3.9796e-13	3.04871e-12
ENSMUSG00000054237	Fra10ac1	-1.64292	4.31075	4.0246e-13	3.08093e-12
ENSMUSG00000095620	Csta2	11.859	1.9889	4.03978e-13	3.0903e-12
ENSMUSG00000062175	Tgif2	-3.47398	2.23281	4.05237e-13	3.09768e-12
ENSMUSG00000041961	Znrf3	-3.49595	1.8924	4.08089e-13	3.11721e-12
ENSMUSG00000031825	Crispld2	6.22182	1.61302	4.10375e-13	3.13239e-12
ENSMUSG00000026430	Rassf5	1.06581	6.57243	4.14641e-13	3.16266e-12
ENSMUSG00000024696	Lpxn	-1.68294	4.63204	4.15744e-13	3.16877e-12
ENSMUSG00000027787	Nmd3	-1.59648	5.70922	4.16382e-13	3.17133e-12
ENSMUSG00000021470	Ercc6l2	-1.06207	5.27328	4.18108e-13	3.18217e-12
ENSMUSG00000029504	Ddx51	-1.95883	5.08867	4.18785e-13	3.18501e-12
ENSMUSG00000043279	Trim56	1.14094	6.34123	4.2099e-13	3.19946e-12
ENSMUSG00000025899	Alkbh8	-1.82514	5.23842	4.23002e-13	3.21243e-12
ENSMUSG00000028657	Ppt1	1.23196	6.76484	4.30425e-13	3.26644e-12
ENSMUSG00000057147	Dph6	-2.06816	4.51143	4.3151e-13	3.27231e-12
ENSMUSG00000031917	Nip7	-1.65201	5.65667	4.32227e-13	3.27538e-12
ENSMUSG00000092203	1110038B12Rik	-1.46124	5.80891	4.33749e-13	3.28337e-12
ENSMUSG00000020787	P2rx1	1.94751	6.10261	4.33906e-13	3.28337e-12
ENSMUSG00000032386	Trip4	1.40323	5.52313	4.4078e-13	3.33299e-12
ENSMUSG00000056608	Chd9	-1.21395	6.47603	4.42504e-13	3.34361e-12
ENSMUSG00000026657	Frmd4a	-1.73476	5.02962	4.44012e-13	3.35019e-12
ENSMUSG00000059482	Cfap418	-2.84247	4.00376	4.44013e-13	3.35019e-12
ENSMUSG00000028599	Tnfrsf1b	1.10328	7.16602	4.47643e-13	3.37516e-12
ENSMUSG00000037287	Tbcel	1.66286	5.46287	4.48546e-13	3.37954e-12
ENSMUSG00000030357	Fkbp4	-1.90864	8.13598	4.4941e-13	3.3817e-12
ENSMUSG00000020448	Rnf185	1.46044	5.08522	4.49477e-13	3.3817e-12
ENSMUSG00000028677	Rnf220	-1.13554	6.42588	4.51779e-13	3.39659e-12
ENSMUSG00000037656	Slc20a2	-1.62046	4.50128	4.62735e-13	3.47647e-12
ENSMUSG00000063077	Kif1b	1.43155	5.58941	4.69459e-13	3.52446e-12
ENSMUSG00000038451	Spsb2	2.54716	3.39611	4.70141e-13	3.52706e-12
ENSMUSG00000068922	Msto1	-2.26432	4.64325	4.7234e-13	3.54104e-12
ENSMUSG00000034616	Ssh3	1.65892	4.83381	4.73977e-13	3.55077e-12
ENSMUSG00000022026	Olfm4	10.9082	3.01423	4.76016e-13	3.56351e-12
ENSMUSG00000022031	Elp3	-1.16879	6.18949	4.77389e-13	3.57124e-12
ENSMUSG00000033382	Trappc8	1.13585	6.77515	4.77834e-13	3.57202e-12
ENSMUSG00000052539	Magi3	1.30571	5.70425	4.78351e-13	3.57334e-12
ENSMUSG00000024735	Prpf19	-1.34594	7.41118	4.80498e-13	3.58683e-12
ENSMUSG00000034673	Pbx2	0.974041	6.52576	4.8132e-13	3.59042e-12
ENSMUSG00000054499	Dedd2	1.45976	6.06061	4.82435e-13	3.59618e-12
ENSMUSG00000038736	Nudcd1	-1.75116	5.23222	4.91341e-13	3.65935e-12
ENSMUSG00000028964	Park7	-1.11161	7.39613	4.91606e-13	3.65935e-12
ENSMUSG00000022094	Slc39a14	-3.43069	2.49192	4.95327e-13	3.68243e-12
ENSMUSG00000056145	AI504432	-6.67802	2.90392	4.95409e-13	3.68243e-12
ENSMUSG00000024969	Mark2	1.18736	6.89708	4.97095e-13	3.69151e-12
ENSMUSG00000029821	Gsdme	2.52152	4.83227	4.97333e-13	3.69151e-12
ENSMUSG00000020817	Rabep1	-1.10632	5.35248	4.98001e-13	3.69386e-12
ENSMUSG00000069874	Irgm2	2.46194	2.86724	4.99179e-13	3.69998e-12
ENSMUSG00000054766	Set	-1.5889	9.24641	5.00735e-13	3.7089e-12
ENSMUSG00000020649	Rrm2	1.28387	8.84554	5.0146e-13	3.71165e-12
ENSMUSG00000021643	Serf1	-3.08265	3.02352	5.04121e-13	3.72802e-12
ENSMUSG00000034959	Rubcnl	3.68183	1.67908	5.04381e-13	3.72802e-12
ENSMUSG00000021222	Dcaf4	-2.29845	3.46471	5.07531e-13	3.74867e-12
ENSMUSG00000005973	Rcn1	-1.03245	5.90499	5.09691e-13	3.76197e-12
ENSMUSG00000022575	Gsdmd	1.55127	6.17163	5.12996e-13	3.78194e-12
ENSMUSG00000045928	4933440M02Rik	-5.56333	2.73311	5.13116e-13	3.78194e-12
ENSMUSG00000031730	Dhodh	-2.07363	4.19045	5.14474e-13	3.78928e-12
ENSMUSG00000029447	Cct6a	-1.46587	8.56495	5.16735e-13	3.80327e-12
ENSMUSG00000090394	4930523C07Rik	1.74888	5.60098	5.21581e-13	3.83625e-12
ENSMUSG00000021114	Atp6v1d	1.44836	6.9938	5.2445e-13	3.85465e-12
ENSMUSG00000018293	Pfn1	1.07652	9.26107	5.28227e-13	3.8797e-12
ENSMUSG00000001424	Snd1	-1.39893	8.38737	5.33265e-13	3.91396e-12
ENSMUSG00000087689	Gm15845	7.94855	-1.94579	5.35726e-13	3.92928e-12
ENSMUSG00000089665	Fcor	3.07009	2.77271	5.36811e-13	3.93449e-12
ENSMUSG00000024978	Gpam	-2.37128	3.82737	5.39807e-13	3.95369e-12
ENSMUSG00000037613	Tnfrsf23	5.57057	2.99906	5.48091e-13	4.01156e-12
ENSMUSG00000038286	Bphl	-1.9103	4.01067	5.52121e-13	4.03825e-12
ENSMUSG00000021719	Rgs7bp	-7.77915	-1.08005	5.52929e-13	4.04135e-12
ENSMUSG00000073481	Mtarc2	-1.14345	5.89511	5.53556e-13	4.04311e-12
ENSMUSG00000022781	Pak2	1.08163	8.07119	5.55116e-13	4.05169e-12
ENSMUSG00000009566	Fpgs	-3.47642	3.30171	5.57182e-13	4.06212e-12
ENSMUSG00000001100	Poldip2	-1.44148	6.01862	5.57319e-13	4.06212e-12
ENSMUSG00000036469	Marchf1	8.56166	-0.124035	5.5955e-13	4.07555e-12
ENSMUSG00000024413	Npc1	1.51533	5.81295	5.6506e-13	4.11284e-12
ENSMUSG00000056666	Retsat	-3.04196	3.84928	5.66279e-13	4.11801e-12
ENSMUSG00000032667	Pon2	0.957007	5.83643	5.66554e-13	4.11801e-12
ENSMUSG00000029233	Srd5a3	1.46326	4.91846	5.72133e-13	4.15568e-12
ENSMUSG00000028414	Fktn	-1.36408	4.23791	5.75873e-13	4.17996e-12
ENSMUSG00000068735	Trp53i11	-3.27555	3.86684	5.76978e-13	4.18508e-12
ENSMUSG00000017485	Top2b	-0.917496	8.20012	5.8081e-13	4.20997e-12
ENSMUSG00000029290	Zfp326	-1.65137	5.37139	5.82351e-13	4.21823e-12
ENSMUSG00000021959	Lats2	1.82174	3.90185	5.84949e-13	4.23187e-12
ENSMUSG00000022519	Srl	-2.41266	3.56035	5.8504e-13	4.23187e-12
ENSMUSG00000030079	Ruvbl1	-2.39749	6.1334	5.8592e-13	4.23532e-12
ENSMUSG00000034480	Diaph2	1.2626	5.70159	5.89467e-13	4.25803e-12
ENSMUSG00000029319	Coq2	-1.59768	5.20435	5.89927e-13	4.25842e-12
ENSMUSG00000008604	Ubqln4	-1.36642	6.37223	5.92975e-13	4.27749e-12
ENSMUSG00000015087	Rabl6	-0.923046	6.56851	5.97147e-13	4.30462e-12
ENSMUSG00000010048	Ifrd2	-2.83537	5.57163	6.04699e-13	4.35607e-12
ENSMUSG00000039741	Bahcc1	-1.83124	5.36962	6.08198e-13	4.37827e-12
ENSMUSG00000039033	Tasp1	-1.77629	3.68305	6.24925e-13	4.49561e-12
ENSMUSG00000050708	Ftl1	1.41122	10.338	6.3156e-13	4.54023e-12
ENSMUSG00000025289	Prdx4	-3.06588	4.14185	6.33446e-13	4.55068e-12
ENSMUSG00000066026	Dhrs3	3.03202	4.12826	6.3648e-13	4.56934e-12
ENSMUSG00000041688	Amot	-2.75443	2.43038	6.38989e-13	4.58422e-12
ENSMUSG00000026305	Lrrfip1	0.965093	8.06184	6.4283e-13	4.60863e-12
ENSMUSG00000021936	Mapk8	-1.11117	5.35782	6.55199e-13	4.6941e-12
ENSMUSG00000022751	Nit2	-1.58671	4.24317	6.62394e-13	4.74241e-12
ENSMUSG00000059900	Tmem40	1.53036	6.16126	6.63531e-13	4.74732e-12
ENSMUSG00000006442	Srm	-2.96407	6.5533	6.7146e-13	4.80078e-12
ENSMUSG00000022902	Stfa2	14.2954	1.66832	6.72502e-13	4.80496e-12
ENSMUSG00000033216	Eefsec	-1.48221	4.62502	6.7357e-13	4.80932e-12
ENSMUSG00000053907	Mat2a	-1.34984	8.08362	6.78461e-13	4.84095e-12
ENSMUSG00000052212	Cd177	12.3777	2.35775	6.8078e-13	4.8542e-12
ENSMUSG00000035085	1700020L24Rik	2.18843	5.25627	6.81446e-13	4.85565e-12
ENSMUSG00000074578	Zfas1	-2.13623	5.29374	6.83062e-13	4.86387e-12
ENSMUSG00000035863	Palm	1.08234	7.15824	6.88883e-13	4.90199e-12
ENSMUSG00000021054	Sgpp1	1.77025	3.94744	6.95947e-13	4.94733e-12
ENSMUSG00000042699	Dhx9	-0.813005	8.91417	6.96196e-13	4.94733e-12
ENSMUSG00000025860	Xiap	1.10594	6.83514	7.06737e-13	5.01883e-12
ENSMUSG00000063480	Snu13	-1.54973	6.82355	7.08425e-13	5.02608e-12
ENSMUSG00000028413	B4galt1	1.0867	7.37531	7.08714e-13	5.02608e-12
ENSMUSG00000054091	1810037I17Rik	1.54393	6.1874	7.16875e-13	5.07984e-12
ENSMUSG00000030753	Thap12	-1.4677	6.05225	7.17262e-13	5.07984e-12
ENSMUSG00000006289	Osgep	-0.96496	5.60474	7.18037e-13	5.0819e-12
ENSMUSG00000022419	Deptor	-3.9538	2.5986	7.21867e-13	5.10557e-12
ENSMUSG00000026835	Fcnb	2.81647	7.00282	7.28652e-13	5.15009e-12
ENSMUSG00000024818	Slc25a45	1.09764	5.89828	7.3303e-13	5.17755e-12
ENSMUSG00000042066	Tmcc2	-3.30149	2.69774	7.37689e-13	5.20696e-12
ENSMUSG00000026197	Zfand2b	1.49524	4.61186	7.44504e-13	5.24986e-12
ENSMUSG00000024011	Pi16	3.50055	5.64863	7.44768e-13	5.24986e-12
ENSMUSG00000038357	Camp	10.481	2.97467	7.46064e-13	5.25328e-12
ENSMUSG00000042462	Dctpp1	-1.89584	5.33362	7.46253e-13	5.25328e-12
ENSMUSG00000039158	Akna	2.10734	6.72195	7.49791e-13	5.27465e-12
ENSMUSG00000033285	Wdr3	-1.49497	6.53704	7.57947e-13	5.32846e-12
ENSMUSG00000022403	St13	-1.23561	8.03814	7.62753e-13	5.35866e-12
ENSMUSG00000086290	Snhg12	-2.51831	4.05254	7.70089e-13	5.40658e-12
ENSMUSG00000021987	Mtmr6	1.69534	7.13787	7.71036e-13	5.40961e-12
ENSMUSG00000037936	Scarb1	1.31588	7.82763	7.79837e-13	5.46771e-12
ENSMUSG00000071644	Eef1g	-1.45056	9.36169	7.8968e-13	5.53303e-12
ENSMUSG00000024558	Mapk4	4.18671	1.61447	7.91798e-13	5.54258e-12
ENSMUSG00000070713	Hmgn2-ps	1.38845	5.79765	7.92098e-13	5.54258e-12
ENSMUSG00000045980	Tmem104	1.26228	4.6977	7.96089e-13	5.56679e-12
ENSMUSG00000038279	Nop2	-2.36114	6.33387	8.08405e-13	5.64704e-12
ENSMUSG00000050605	Zfp61	-2.04387	3.48378	8.08641e-13	5.64704e-12
ENSMUSG00000027177	Hipk3	1.27353	6.57469	8.10609e-13	5.65703e-12
ENSMUSG00000028849	Map7d1	0.976712	7.04399	8.15643e-13	5.68838e-12
ENSMUSG00000078817	Nlrp12	5.43103	2.7987	8.17121e-13	5.6949e-12
ENSMUSG00000005882	Uqcc1	-1.35307	5.58414	8.21284e-13	5.72013e-12
ENSMUSG00000097705	Gm26740	3.07806	2.7098	8.24239e-13	5.7369e-12
ENSMUSG00000040621	Gemin8	-2.67832	2.92299	8.27123e-13	5.75316e-12
ENSMUSG00000033386	Frrs1	1.03755	6.94648	8.3e-13	5.76935e-12
ENSMUSG00000032898	Fbxo21	-2.03753	3.66525	8.3403e-13	5.79353e-12
ENSMUSG00000054169	Ceacam10	10.6791	-0.760315	8.36772e-13	5.80873e-12
ENSMUSG00000035900	Gramd4	-2.10149	4.80172	8.46637e-13	5.86871e-12
ENSMUSG00000003808	Farsa	-1.44816	6.94201	8.46661e-13	5.86871e-12
ENSMUSG00000025278	Flnb	-2.04641	8.77535	8.47088e-13	5.86871e-12
ENSMUSG00000072568	Lratd2	-1.9221	4.54655	8.67437e-13	6.00573e-12
ENSMUSG00000039768	Dnajc11	-1.66739	6.28562	8.6885e-13	6.01155e-12
ENSMUSG00000033416	Gucd1	1.46525	5.01491	8.74006e-13	6.04325e-12
ENSMUSG00000034342	Cbl	1.57538	8.44019	8.82631e-13	6.09887e-12
ENSMUSG00000032420	Nt5e	5.03333	2.58981	8.85248e-13	6.11292e-12
ENSMUSG00000087679	Tmem250-ps	-1.64899	5.09581	8.87531e-13	6.12466e-12
ENSMUSG00000046668	Cxxc5	-4.31422	3.40064	8.8982e-13	6.13643e-12
ENSMUSG00000056310	Tyw1	-1.00495	5.54839	8.90905e-13	6.13988e-12
ENSMUSG00000054509	Parp4	1.77513	5.49739	8.96998e-13	6.17572e-12
ENSMUSG00000047434	Xxylt1	-2.3342	4.57135	8.97294e-13	6.17572e-12
ENSMUSG00000014778	Fhod1	1.63361	4.97224	8.97869e-13	6.17572e-12
ENSMUSG00000072653	Zfp783	-3.621	3.19593	9.01416e-13	6.19605e-12
ENSMUSG00000020261	Slc36a1	1.12213	6.2081	9.15686e-13	6.29003e-12
ENSMUSG00000031600	Vps37a	1.48519	5.75506	9.18637e-13	6.30617e-12
ENSMUSG00000005774	Rfx5	-1.12937	5.00803	9.20894e-13	6.31754e-12
ENSMUSG00000063410	Stk24	0.769347	7.44701	9.24742e-13	6.3398e-12
ENSMUSG00000052397	Ezr	0.981204	7.70532	9.27839e-13	6.35687e-12
ENSMUSG00000022228	Zscan26	-1.38291	4.66856	9.45648e-13	6.47467e-12
ENSMUSG00000040511	Pvr	-1.43622	4.96203	9.57575e-13	6.55206e-12
ENSMUSG00000022436	Sh3bp1	1.48017	4.95339	9.60246e-13	6.56606e-12
ENSMUSG00000025646	Atrip	-1.20754	4.5807	9.63515e-13	6.58413e-12
ENSMUSG00000032440	Tgfbr2	1.40079	5.31184	9.64915e-13	6.5894e-12
ENSMUSG00000032727	Mier3	1.21709	5.44495	9.7509e-13	6.65456e-12
ENSMUSG00000021493	Pdlim7	1.08976	5.1909	9.77364e-13	6.66575e-12
ENSMUSG00000020785	Camkk1	2.18397	3.68071	9.78015e-13	6.66586e-12
ENSMUSG00000032010	Usp2	2.076	3.24977	9.79459e-13	6.67138e-12
ENSMUSG00000028069	Gpatch4	-3.12377	4.69555	9.87003e-13	6.7184e-12
ENSMUSG00000006179	Prss16	2.04831	4.06393	9.90648e-13	6.73885e-12
ENSMUSG00000031826	Usp10	-2.40149	5.57813	1.02262e-12	6.95183e-12
ENSMUSG00000029208	Guf1	-1.35972	5.85997	1.02421e-12	6.95817e-12
ENSMUSG00000055447	Cd47	0.955988	8.9982	1.02664e-12	6.97014e-12
ENSMUSG00000026473	Glul	-1.6271	5.93872	1.04451e-12	7.08691e-12
ENSMUSG00000033871	Ppargc1b	-3.83006	1.60804	1.04866e-12	7.11042e-12
ENSMUSG00000030340	Scnn1a	3.03092	2.57993	1.0552e-12	7.15017e-12
ENSMUSG00000032014	Oaf	-2.77065	3.93708	1.05875e-12	7.16961e-12
ENSMUSG00000031930	Wwp2	0.797052	6.97388	1.06452e-12	7.20401e-12
ENSMUSG00000031555	Adam9	1.01947	5.70016	1.06706e-12	7.21564e-12
ENSMUSG00000005057	Sh2b2	1.38712	5.30909	1.06761e-12	7.21564e-12
ENSMUSG00000049422	Chchd10	-2.60874	4.08232	1.07921e-12	7.28937e-12
ENSMUSG00000058794	Nfe2	0.894475	8.02256	1.08757e-12	7.3411e-12
ENSMUSG00000016344	Ppdpf	-1.39098	4.57178	1.08837e-12	7.3418e-12
ENSMUSG00000054808	Actn4	0.884976	8.20154	1.09172e-12	7.35964e-12
ENSMUSG00000050377	Il31ra	-8.96202	0.131601	1.09297e-12	7.36336e-12
ENSMUSG00000048163	Selplg	1.52488	7.46099	1.09615e-12	7.38001e-12
ENSMUSG00000001403	Ube2c	1.08719	7.49698	1.10047e-12	7.40435e-12
ENSMUSG00000045679	Pqlc3	1.70423	5.95813	1.1017e-12	7.40438e-12
ENSMUSG00000033253	Szt2	1.3534	6.2378	1.10188e-12	7.40438e-12
ENSMUSG00000056413	Adap1	1.14249	6.24971	1.1034e-12	7.40986e-12
ENSMUSG00000058979	Hdhd5	-2.66431	2.63075	1.10618e-12	7.42381e-12
ENSMUSG00000031578	Mak16	-1.44404	6.1032	1.10814e-12	7.43221e-12
ENSMUSG00000049881	2810025M15Rik	-1.82987	2.91233	1.11055e-12	7.4436e-12
ENSMUSG00000001700	Gramd3	-1.95071	3.70856	1.11423e-12	7.46351e-12
ENSMUSG00000063785	Utp14a	-1.25119	6.17226	1.11636e-12	7.47238e-12
ENSMUSG00000022898	Vps26c	1.34582	5.89545	1.11698e-12	7.47238e-12
ENSMUSG00000034430	Zxdc	1.14176	4.82248	1.11797e-12	7.47426e-12
ENSMUSG00000023074	Mospd1	1.64048	5.234	1.12617e-12	7.5223e-12
ENSMUSG00000072964	Bhlhb9	-2.20969	3.61358	1.12659e-12	7.5223e-12
ENSMUSG00000032750	Gab3	2.54081	2.67305	1.1283e-12	7.52895e-12
ENSMUSG00000078763	Slfn1	10.9831	-0.565677	1.1291e-12	7.52946e-12
ENSMUSG00000031007	Atp6ap2	0.911615	8.04772	1.13037e-12	7.53318e-12
ENSMUSG00000032834	Pwp2	-2.65848	4.77658	1.13305e-12	7.54532e-12
ENSMUSG00000028484	Psip1	-0.759586	7.08959	1.13363e-12	7.54532e-12
ENSMUSG00000028641	P3h1	-2.69704	3.61798	1.14161e-12	7.59365e-12
ENSMUSG00000027313	Chac1	2.75521	3.11679	1.15281e-12	7.66324e-12
ENSMUSG00000085264	Gm15581	-6.94447	-0.0958997	1.15665e-12	7.68394e-12
ENSMUSG00000032966	Fkbp1a	-1.70912	6.88593	1.15988e-12	7.70052e-12
ENSMUSG00000044018	Mrpl50	-1.55166	5.44286	1.18003e-12	7.82932e-12
ENSMUSG00000031897	Psmb10	-1.48042	5.067	1.18161e-12	7.83487e-12
ENSMUSG00000043895	S1pr2	1.72358	4.66889	1.18436e-12	7.84749e-12
ENSMUSG00000037376	Trmt6	-1.46973	5.84958	1.18501e-12	7.84749e-12
ENSMUSG00000025225	Nfkb2	1.41499	5.1132	1.19412e-12	7.90283e-12
ENSMUSG00000040054	Baz2a	0.912546	7.71228	1.19728e-12	7.91878e-12
ENSMUSG00000025047	Pdcd11	-2.1299	6.36788	1.20424e-12	7.95979e-12
ENSMUSG00000092274	Neat1	2.79316	7.53773	1.21358e-12	8.01596e-12
ENSMUSG00000050786	Ccdc126	2.56102	3.4838	1.21426e-12	8.01596e-12
ENSMUSG00000017724	Etv4	-7.17747	1.39001	1.21927e-12	8.04399e-12
ENSMUSG00000026491	Ahctf1	-1.07382	7.43698	1.2263e-12	8.08293e-12
ENSMUSG00000074677	Sirpb1c	7.45063	-1.87585	1.22672e-12	8.08293e-12
ENSMUSG00000023277	Twf2	1.37014	7.09089	1.23783e-12	8.15105e-12
ENSMUSG00000022314	Rad21	0.91125	8.91977	1.23955e-12	8.15728e-12
ENSMUSG00000026718	Stam	-1.05297	5.55218	1.24142e-12	8.1618e-12
ENSMUSG00000052331	Ankrd44	1.00772	7.67911	1.24179e-12	8.1618e-12
ENSMUSG00000049295	Zfp219	-1.58724	4.57688	1.24408e-12	8.17173e-12
ENSMUSG00000030793	Pycard	1.69535	6.16456	1.24861e-12	8.19633e-12
ENSMUSG00000058503	Fam133b	-1.00623	5.87693	1.25264e-12	8.21767e-12
ENSMUSG00000034807	Colgalt1	-0.965052	7.63256	1.25495e-12	8.2277e-12
ENSMUSG00000039840	Epg5	1.41781	5.81814	1.25733e-12	8.23812e-12
ENSMUSG00000033792	Atp7a	2.66797	3.53845	1.26125e-12	8.25869e-12
ENSMUSG00000070780	Rbm47	3.20769	1.32775	1.26351e-12	8.26829e-12
ENSMUSG00000028041	Adam15	0.943003	7.09516	1.27637e-12	8.34726e-12
ENSMUSG00000042389	Tsen2	-2.59267	3.05881	1.29291e-12	8.45016e-12
ENSMUSG00000021311	Mtr	-1.28785	6.15708	1.29863e-12	8.47706e-12
ENSMUSG00000011257	Pabpc4	-1.43054	7.99355	1.29912e-12	8.47706e-12
ENSMUSG00000050029	Rap2c	1.09211	6.33472	1.29944e-12	8.47706e-12
ENSMUSG00000034652	Cd300a	1.49504	5.94696	1.33216e-12	8.6851e-12
ENSMUSG00000037447	Arid5a	1.33997	5.33615	1.33389e-12	8.69095e-12
ENSMUSG00000074063	Osgin1	3.20992	3.50182	1.3364e-12	8.70192e-12
ENSMUSG00000022965	Ifngr2	1.7203	5.62101	1.34165e-12	8.73069e-12
ENSMUSG00000025531	Chm	1.15664	5.34119	1.3435e-12	8.73735e-12
ENSMUSG00000040725	Hnrnpul1	0.702571	8.93484	1.35522e-12	8.80806e-12
ENSMUSG00000018736	Ndel1	1.2934	5.89813	1.36223e-12	8.84815e-12
ENSMUSG00000059089	Fcgr4	4.79077	2.58862	1.3686e-12	8.88405e-12
ENSMUSG00000032388	Spg21	1.01946	6.2844	1.37279e-12	8.90031e-12
ENSMUSG00000024601	Isoc1	-1.68404	5.56252	1.3728e-12	8.90031e-12
ENSMUSG00000029708	Gcc1	1.18522	4.77781	1.37408e-12	8.90311e-12
ENSMUSG00000050079	Rspry1	1.00959	5.91189	1.38381e-12	8.96066e-12
ENSMUSG00000017774	Myo1c	0.804138	6.91273	1.38637e-12	8.97168e-12
ENSMUSG00000029276	Glmn	-1.84133	3.93032	1.40117e-12	9.06189e-12
ENSMUSG00000033721	Vav3	-0.79927	6.86799	1.40321e-12	9.06951e-12
ENSMUSG00000027810	Eif2a	-0.948379	6.95132	1.4046e-12	9.07287e-12
ENSMUSG00000016526	Dyrk3	-2.59725	2.69103	1.41102e-12	9.10873e-12
ENSMUSG00000008393	Carhsp1	2.23877	5.90544	1.41902e-12	9.1548e-12
ENSMUSG00000049916	2610318N02Rik	-2.49928	4.04338	1.42516e-12	9.18873e-12
ENSMUSG00000067212	H2-T23	1.84401	5.21194	1.42802e-12	9.20153e-12
ENSMUSG00000074342	I830077J02Rik	2.54111	5.29678	1.43312e-12	9.22781e-12
ENSMUSG00000029438	Bcl7a	-2.14669	4.99012	1.43453e-12	9.22781e-12
ENSMUSG00000008398	Elk3	-1.28394	5.34167	1.43473e-12	9.22781e-12
ENSMUSG00000047507	Baiap3	2.74287	2.96124	1.44557e-12	9.29178e-12
ENSMUSG00000030703	Gdpd3	2.52813	2.66731	1.4554e-12	9.34925e-12
ENSMUSG00000021549	Rasa1	-0.884213	6.25429	1.46622e-12	9.413e-12
ENSMUSG00000025572	Tmc6	1.18367	5.26108	1.46931e-12	9.42712e-12
ENSMUSG00000038500	Prr3	-1.56729	3.85445	1.47312e-12	9.44577e-12
ENSMUSG00000049988	Lrrc25	2.9449	3.28488	1.47536e-12	9.45434e-12
ENSMUSG00000043587	Pxylp1	1.12389	6.00876	1.47836e-12	9.46778e-12
ENSMUSG00000025439	Clns1a	-1.14748	6.77437	1.4917e-12	9.5474e-12
ENSMUSG00000015291	Gdi1	1.18341	6.6295	1.50382e-12	9.61913e-12
ENSMUSG00000033192	Lpcat2	1.21948	6.60634	1.51783e-12	9.70283e-12
ENSMUSG00000020152	Actr2	1.22684	9.09585	1.52041e-12	9.71342e-12
ENSMUSG00000030691	Fchsd2	-1.34262	5.81656	1.52499e-12	9.73676e-12
ENSMUSG00000021408	Ripk1	1.27305	6.8693	1.52765e-12	9.7478e-12
ENSMUSG00000026031	Cflar	0.897598	6.3512	1.54467e-12	9.8504e-12
ENSMUSG00000075033	Nxpe3	-1.74901	4.69264	1.54829e-12	9.86486e-12
ENSMUSG00000036966	Spryd3	1.49877	4.76804	1.54881e-12	9.86486e-12
ENSMUSG00000046861	Hectd3	1.03629	5.38515	1.556e-12	9.90085e-12
ENSMUSG00000041995	Zbed3	-1.82131	4.92655	1.55635e-12	9.90085e-12
ENSMUSG00000024081	Cebpz	-1.05294	7.04478	1.55942e-12	9.9144e-12
ENSMUSG00000023008	Fmnl3	1.31168	6.38581	1.56102e-12	9.91858e-12
ENSMUSG00000022466	Rpap3	-1.89247	5.02334	1.56242e-12	9.92145e-12
ENSMUSG00000016554	Eif3d	-0.908668	7.77771	1.57378e-12	9.98758e-12
ENSMUSG00000029722	Agfg2	1.21376	5.66337	1.57635e-12	9.99783e-12
ENSMUSG00000029246	Ppat	-1.73958	6.48296	1.58065e-12	1.00191e-11
ENSMUSG00000042410	Agps	0.908184	8.38168	1.58864e-12	1.00636e-11
ENSMUSG00000002413	Braf	1.40179	5.98604	1.58959e-12	1.00636e-11
ENSMUSG00000027639	Samhd1	1.20731	7.24784	1.59238e-12	1.00752e-11
ENSMUSG00000004264	Phb2	-1.19388	7.754	1.60198e-12	1.01298e-11
ENSMUSG00000062937	Mtap	-3.50872	5.0359	1.60927e-12	1.01698e-11
ENSMUSG00000051510	Mafg	1.37711	6.92599	1.61081e-12	1.01734e-11
ENSMUSG00000049323	Smcr8	1.49094	7.07515	1.61591e-12	1.01995e-11
ENSMUSG00000022433	Csnk1e	-1.02443	5.97024	1.62308e-12	1.02386e-11
ENSMUSG00000054619	Mettl7a1	-1.61909	4.68131	1.63148e-12	1.02854e-11
ENSMUSG00000090019	Gimap1	-6.62725	2.33229	1.64571e-12	1.03688e-11
ENSMUSG00000005054	Cstb	1.86926	5.6197	1.64774e-12	1.03754e-11
ENSMUSG00000058355	Abce1	-1.59627	7.84693	1.6625e-12	1.04621e-11
ENSMUSG00000030189	Ybx3	-1.75571	8.15422	1.66691e-12	1.04836e-11
ENSMUSG00000020692	Nle1	-3.01714	4.14972	1.68759e-12	1.06073e-11
ENSMUSG00000029108	Pcdh7	-2.08338	5.27519	1.69543e-12	1.06501e-11
ENSMUSG00000014606	Slc25a11	0.844902	6.71551	1.69643e-12	1.06501e-11
ENSMUSG00000021363	Mak	7.77033	-1.4703	1.70037e-12	1.06685e-11
ENSMUSG00000055670	Zzef1	1.00103	6.96544	1.70589e-12	1.06967e-11
ENSMUSG00000007836	Hnrnpa0	-1.0426	7.73278	1.70808e-12	1.0704e-11
ENSMUSG00000030557	Mef2a	1.26566	6.15907	1.71084e-12	1.07149e-11
ENSMUSG00000063268	Parp10	1.15445	5.10403	1.71279e-12	1.07208e-11
ENSMUSG00000066621	Tecpr1	2.62426	4.6056	1.719e-12	1.07532e-11
ENSMUSG00000015806	Qdpr	-1.25192	6.20651	1.72203e-12	1.07658e-11
ENSMUSG00000047293	Gpr15	6.11829	-0.475767	1.72389e-12	1.07703e-11
ENSMUSG00000074813	Morrbid	2.17215	4.05322	1.7248e-12	1.07703e-11
ENSMUSG00000066613	Zfp932	-1.88077	4.19449	1.72872e-12	1.07883e-11
ENSMUSG00000003037	Rab8a	1.12705	7.20763	1.75424e-12	1.09411e-11
ENSMUSG00000059657	Stfa2l1	12.9008	3.05964	1.77468e-12	1.10603e-11
ENSMUSG00000007589	Tinf2	0.989537	5.79002	1.77636e-12	1.10603e-11
ENSMUSG00000041632	Mrps27	-2.05503	4.94805	1.77755e-12	1.10603e-11
ENSMUSG00000042129	Rassf4	1.1267	6.23779	1.77757e-12	1.10603e-11
ENSMUSG00000030036	Mogs	-1.63316	6.96453	1.78325e-12	1.10891e-11
ENSMUSG00000038473	Nos1ap	5.99364	0.904352	1.79106e-12	1.11311e-11
ENSMUSG00000026389	Steap3	-2.83963	4.89412	1.80077e-12	1.11848e-11
ENSMUSG00000054079	Utp18	-1.59269	5.73921	1.80601e-12	1.12107e-11
ENSMUSG00000034203	Chchd4	-2.24653	5.32928	1.82245e-12	1.13061e-11
ENSMUSG00000037580	Gch1	-2.45458	3.11478	1.82668e-12	1.13192e-11
ENSMUSG00000028223	Decr1	-1.35381	4.96946	1.82672e-12	1.13192e-11
ENSMUSG00000037313	Tacc3	1.18722	7.81902	1.82911e-12	1.13273e-11
ENSMUSG00000031928	Mre11a	-0.898337	6.1599	1.83081e-12	1.13312e-11
ENSMUSG00000024026	Glo1	-1.38238	5.39859	1.85092e-12	1.14489e-11
ENSMUSG00000038525	Armc10	-1.27747	5.35675	1.87236e-12	1.15747e-11
ENSMUSG00000055013	Agap1	2.05368	5.41499	1.88153e-12	1.16245e-11
ENSMUSG00000039046	Usp6nl	-2.68426	4.08323	1.91311e-12	1.18127e-11
ENSMUSG00000053063	Clec12a	1.28071	8.1347	1.938e-12	1.19589e-11
ENSMUSG00000020021	Fgd6	2.33731	2.56088	1.93907e-12	1.19589e-11
ENSMUSG00000035232	Pdk3	1.03949	5.92714	1.94078e-12	1.19625e-11
ENSMUSG00000020776	Fbf1	-1.4079	4.90411	1.94457e-12	1.19788e-11
ENSMUSG00000031299	Pdha1	-1.07114	7.95627	1.97571e-12	1.21635e-11
ENSMUSG00000027865	Gdap2	1.05054	5.32073	1.97731e-12	1.21662e-11
ENSMUSG00000037169	Mycn	-7.57426	-0.206468	1.98513e-12	1.22071e-11
ENSMUSG00000032456	Nmnat3	-2.56508	3.11518	1.99645e-12	1.22696e-11
ENSMUSG00000056131	Pgm3	-1.54578	4.38034	2.02645e-12	1.24467e-11
ENSMUSG00000036707	Cab39	0.816117	8.12101	2.03017e-12	1.24622e-11
ENSMUSG00000002332	Dhrs1	1.77812	5.23992	2.0325e-12	1.24687e-11
ENSMUSG00000024036	Slc37a1	1.11962	4.51506	2.0336e-12	1.24687e-11
ENSMUSG00000022992	Kansl2	-1.53905	5.65034	2.03515e-12	1.24709e-11
ENSMUSG00000031633	Slc25a4	-1.2752	6.45455	2.05147e-12	1.25636e-11
ENSMUSG00000076432	Ywhaq	-0.902142	7.89978	2.06024e-12	1.261e-11
ENSMUSG00000020227	Irak3	1.16345	6.23954	2.10698e-12	1.28886e-11
ENSMUSG00000031563	Wwc2	-1.19663	5.13427	2.10999e-12	1.28994e-11
ENSMUSG00000037339	Fam53a	-1.39545	4.421	2.14455e-12	1.31031e-11
ENSMUSG00000001123	Lgals9	-0.874724	8.25062	2.20874e-12	1.34874e-11
ENSMUSG00000025209	Twnk	-2.23265	4.39881	2.22492e-12	1.35783e-11
ENSMUSG00000002205	Vrk3	1.05738	5.78623	2.22668e-12	1.35812e-11
ENSMUSG00000030842	Lamtor1	1.23164	6.55144	2.23542e-12	1.36266e-11
ENSMUSG00000022474	Pmm1	1.59424	4.43313	2.26969e-12	1.38275e-11
ENSMUSG00000026107	Nabp1	2.61775	5.66322	2.28623e-12	1.39201e-11
ENSMUSG00000019302	Atp6v0a1	0.98964	7.49474	2.29915e-12	1.39907e-11
ENSMUSG00000041308	Sntb2	1.59566	4.53105	2.30817e-12	1.40375e-11
ENSMUSG00000066278	Vps37b	1.30808	5.66733	2.33658e-12	1.41974e-11
ENSMUSG00000026656	Fcgr2b	1.34767	7.68209	2.33716e-12	1.41974e-11
ENSMUSG00000022895	Ets2	1.40283	4.88755	2.34135e-12	1.42146e-11
ENSMUSG00000048120	Entpd1	2.81225	3.07713	2.34454e-12	1.42197e-11
ENSMUSG00000020604	Arsg	3.59309	2.85169	2.3449e-12	1.42197e-11
ENSMUSG00000022604	Cep97	-1.69422	4.30053	2.35541e-12	1.42752e-11
ENSMUSG00000042265	Trem1	2.03088	5.85317	2.3674e-12	1.43348e-11
ENSMUSG00000079418	Atg4a	1.88169	5.00216	2.36934e-12	1.43348e-11
ENSMUSG00000071547	Nt5dc2	-1.6183	7.94513	2.36934e-12	1.43348e-11
ENSMUSG00000052056	Zfp217	1.082	6.93229	2.37204e-12	1.43429e-11
ENSMUSG00000097814	Panct2	7.98416	-1.20784	2.39756e-12	1.44888e-11
ENSMUSG00000029313	Aff1	1.37065	7.2388	2.41191e-12	1.45664e-11
ENSMUSG00000030447	Cyfip1	0.960354	7.11207	2.41317e-12	1.45664e-11
ENSMUSG00000035047	Kri1	0.924601	6.66238	2.42006e-12	1.45996e-11
ENSMUSG00000022651	Retnlg	11.7991	0.869696	2.43346e-12	1.4672e-11
ENSMUSG00000022913	Psmg1	-1.33708	5.40691	2.45928e-12	1.48192e-11
ENSMUSG00000032103	Pus3	-1.75658	4.11343	2.46379e-12	1.48379e-11
ENSMUSG00000035704	Alg8	-1.30584	5.60287	2.48137e-12	1.49352e-11
ENSMUSG00000079426	Arpc4	0.914386	7.6906	2.48565e-12	1.49443e-11
ENSMUSG00000028633	Ctps	-1.90832	5.93334	2.48574e-12	1.49443e-11
ENSMUSG00000013736	Trnt1	-1.3062	6.15142	2.4927e-12	1.49776e-11
ENSMUSG00000075254	Heg1	-1.50667	4.68219	2.50025e-12	1.50143e-11
ENSMUSG00000001034	Mapk7	2.99722	3.70809	2.51439e-12	1.50907e-11
ENSMUSG00000031533	Mrps31	-1.77564	5.0538	2.53524e-12	1.52071e-11
ENSMUSG00000004356	Utp20	-2.59172	6.35904	2.56822e-12	1.53961e-11
ENSMUSG00000038369	Ncoa6	0.909835	7.03103	2.57212e-12	1.5401e-11
ENSMUSG00000050022	Amz1	-3.11663	2.9186	2.57304e-12	1.5401e-11
ENSMUSG00000005936	Kctd20	1.36534	7.90378	2.57343e-12	1.5401e-11
ENSMUSG00000034612	Chst11	1.16888	6.88021	2.5856e-12	1.5465e-11
ENSMUSG00000005514	Por	-1.08291	7.28674	2.60629e-12	1.55799e-11
ENSMUSG00000025591	Tma16	-1.72412	5.05142	2.61012e-12	1.55939e-11
ENSMUSG00000074519	Zfp971	1.44353	4.23172	2.61595e-12	1.56125e-11
ENSMUSG00000026219	Trip12	0.915048	8.64995	2.61621e-12	1.56125e-11
ENSMUSG00000025877	Hk3	0.742092	8.79375	2.62232e-12	1.56401e-11
ENSMUSG00000016921	Srsf6	-1.15385	8.40734	2.64179e-12	1.57473e-11
ENSMUSG00000019951	Uhrf1bp1l	1.07264	6.96943	2.6523e-12	1.5801e-11
ENSMUSG00000029674	Limk1	-1.3617	5.47278	2.67615e-12	1.5934e-11
ENSMUSG00000075284	Wipf1	1.2746	7.24962	2.6787e-12	1.59401e-11
ENSMUSG00000026269	Rnpepl1	0.977478	5.69964	2.69406e-12	1.60225e-11
ENSMUSG00000074746	Pdzd8	1.04923	7.44525	2.70845e-12	1.6099e-11
ENSMUSG00000078713	Tomm5	-1.85252	5.6985	2.71035e-12	1.61012e-11
ENSMUSG00000025436	Atp23	-3.39836	2.96405	2.74434e-12	1.62938e-11
ENSMUSG00000017837	Nkiras2	1.24898	6.03437	2.74946e-12	1.6315e-11
ENSMUSG00000024312	Wdr46	-1.86021	5.97813	2.76466e-12	1.6396e-11
ENSMUSG00000112360	Gm48614	-7.37716	-1.18086	2.77478e-12	1.64467e-11
ENSMUSG00000062906	Hdac10	-2.43921	3.4085	2.78528e-12	1.64996e-11
ENSMUSG00000025993	Slc40a1	8.85363	2.06223	2.80184e-12	1.65836e-11
ENSMUSG00000040774	Cept1	1.21122	6.03596	2.80262e-12	1.65836e-11
ENSMUSG00000000959	Oxa1l	-0.883532	6.15323	2.80457e-12	1.65858e-11
ENSMUSG00000017002	Slpi	2.37214	5.62722	2.81091e-12	1.66139e-11
ENSMUSG00000028651	Ppie	-1.56731	5.10165	2.81483e-12	1.66278e-11
ENSMUSG00000029050	Ski	1.15217	5.46252	2.83714e-12	1.67502e-11
ENSMUSG00000056209	Npm3	-1.92205	6.14313	2.83905e-12	1.6752e-11
ENSMUSG00000035840	Lysmd3	1.17354	4.9841	2.85353e-12	1.6828e-11
ENSMUSG00000036792	Mbd5	1.38883	4.58637	2.89047e-12	1.70315e-11
ENSMUSG00000021025	Nfkbia	3.07143	5.93549	2.89128e-12	1.70315e-11
ENSMUSG00000028914	Casp9	1.0188	5.43267	2.8944e-12	1.70403e-11
ENSMUSG00000041926	Rnpep	1.11984	7.72105	2.89968e-12	1.70618e-11
ENSMUSG00000025465	Echs1	-0.961929	6.60251	2.91207e-12	1.71251e-11
ENSMUSG00000037846	Rtkn2	1.94863	2.87738	2.94349e-12	1.72916e-11
ENSMUSG00000022255	Mtdh	-0.721497	8.13807	2.94437e-12	1.72916e-11
ENSMUSG00000037759	Ptger2	2.9908	1.97674	2.94532e-12	1.72916e-11
ENSMUSG00000104348	Gm37691	2.64332	3.12824	2.97288e-12	1.74437e-11
ENSMUSG00000026832	Cytip	1.87266	5.30884	2.9854e-12	1.75073e-11
ENSMUSG00000031668	Eif2ak3	0.927469	5.44638	3.00155e-12	1.75923e-11
ENSMUSG00000059108	Ifitm6	11.4599	2.99154	3.00622e-12	1.76098e-11
ENSMUSG00000031657	Heatr3	-2.48044	5.44561	3.01667e-12	1.76611e-11
ENSMUSG00000032652	Crebl2	1.79267	3.22947	3.02825e-12	1.7719e-11
ENSMUSG00000028673	Fuca1	1.46683	5.67381	3.03319e-12	1.77381e-11
ENSMUSG00000034667	Xpot	-1.2989	7.60738	3.06984e-12	1.79424e-11
ENSMUSG00000034216	Vps18	1.50993	5.96123	3.09257e-12	1.80652e-11
ENSMUSG00000044103	Il36g	7.89858	2.54192	3.12306e-12	1.82332e-11
ENSMUSG00000106734	Gm20559	2.80462	3.0805	3.12523e-12	1.82357e-11
ENSMUSG00000044811	Cd300c2	4.59362	3.60311	3.20151e-12	1.86704e-11
ENSMUSG00000029635	Cdk8	-1.05161	5.91927	3.20898e-12	1.87036e-11
ENSMUSG00000056383	AI987944	1.45378	5.20822	3.21514e-12	1.87291e-11
ENSMUSG00000053113	Socs3	5.04168	2.72427	3.22543e-12	1.87787e-11
ENSMUSG00000033170	Card10	6.3695	0.58404	3.22836e-12	1.87853e-11
ENSMUSG00000000058	Cav2	2.97272	3.02348	3.23274e-12	1.88004e-11
ENSMUSG00000052926	Rnaseh2a	-1.19974	5.45794	3.25074e-12	1.88946e-11
ENSMUSG00000032431	Crtap	-2.45761	4.68985	3.26262e-12	1.89459e-11
ENSMUSG00000067767	Clec4b2	4.83342	2.13618	3.26382e-12	1.89459e-11
ENSMUSG00000097177	9330159M07Rik	-2.04804	4.19644	3.26497e-12	1.89459e-11
ENSMUSG00000032353	Tmed3	1.16885	6.99722	3.26685e-12	1.89463e-11
ENSMUSG00000028854	Slc9a1	0.990053	5.68071	3.29231e-12	1.9082e-11
ENSMUSG00000078122	F630028O10Rik	3.74864	7.22719	3.29388e-12	1.9082e-11
ENSMUSG00000096719	Mrgpra2b	2.46042	5.33302	3.29935e-12	1.91031e-11
ENSMUSG00000015214	Mtmr1	0.810555	6.23246	3.30626e-12	1.91326e-11
ENSMUSG00000026849	Tor1a	1.29301	5.93475	3.33175e-12	1.92695e-11
ENSMUSG00000006412	Pfdn2	-1.39113	5.65085	3.39005e-12	1.95959e-11
ENSMUSG00000028010	Gar1	-2.75399	5.11038	3.41854e-12	1.97497e-11
ENSMUSG00000026933	Camsap1	-1.49096	4.879	3.42814e-12	1.97942e-11
ENSMUSG00000043008	Klhl6	1.19218	6.64565	3.43685e-12	1.98336e-11
ENSMUSG00000040033	Stat2	1.48504	5.46922	3.44363e-12	1.98618e-11
ENSMUSG00000022623	Shank3	-7.08721	0.333944	3.46618e-12	1.9981e-11
ENSMUSG00000001911	Nfix	-2.1499	4.04648	3.46867e-12	1.99844e-11
ENSMUSG00000057667	Bloc1s3	1.46769	4.01378	3.47304e-12	1.99986e-11
ENSMUSG00000044827	Tlr1	4.77424	2.31199	3.50853e-12	2.01918e-11
ENSMUSG00000044456	Rin3	1.1855	7.69966	3.54514e-12	2.03914e-11
ENSMUSG00000044477	Zfand3	1.29554	6.02422	3.56407e-12	2.0489e-11
ENSMUSG00000003484	Cyp4f18	2.6561	4.44963	3.57673e-12	2.05505e-11
ENSMUSG00000046179	E2f8	1.34051	7.46174	3.58764e-12	2.0602e-11
ENSMUSG00000024170	Telo2	-2.81532	3.96362	3.61947e-12	2.07734e-11
ENSMUSG00000029482	Aacs	1.58572	6.97281	3.62923e-12	2.0818e-11
ENSMUSG00000034636	Zyg11b	0.944921	6.7691	3.64263e-12	2.08835e-11
ENSMUSG00000068566	Myadm	4.48576	4.47306	3.6478e-12	2.09017e-11
ENSMUSG00000037275	Gemin5	-1.61421	6.15467	3.66416e-12	2.0984e-11
ENSMUSG00000043015	Nemp2	1.49258	4.06146	3.69159e-12	2.11296e-11
ENSMUSG00000022969	Il10rb	1.24864	5.57951	3.70729e-12	2.12079e-11
ENSMUSG00000057229	Dmac2	-1.13981	4.68077	3.70992e-12	2.12114e-11
ENSMUSG00000006301	Tmbim1	-1.26372	4.64985	3.72545e-12	2.12886e-11
ENSMUSG00000042333	Tnfrsf14	2.35636	3.44464	3.7678e-12	2.15099e-11
ENSMUSG00000020432	Tcn2	1.93198	7.30624	3.76829e-12	2.15099e-11
ENSMUSG00000106609	Gm43181	8.34504	-1.83736	3.79963e-12	2.16771e-11
ENSMUSG00000016503	Gtf3a	-1.6446	6.00027	3.81118e-12	2.17312e-11
ENSMUSG00000031165	Was	0.96144	7.62579	3.81377e-12	2.17341e-11
ENSMUSG00000048007	Timm8a1	-2.08187	4.11045	3.81997e-12	2.17565e-11
ENSMUSG00000029385	Ccng2	2.00823	6.0905	3.82183e-12	2.17565e-11
ENSMUSG00000055200	Sertad3	2.12636	2.86164	3.84282e-12	2.18641e-11
ENSMUSG00000054942	Miga1	-1.55811	5.04022	3.84528e-12	2.18662e-11
ENSMUSG00000064246	Chil1	13.6176	1.84624	3.88746e-12	2.20941e-11
ENSMUSG00000028743	Akr7a5	-2.35211	3.61359	3.90801e-12	2.21989e-11
ENSMUSG00000033159	Cnppd1	0.905229	6.69253	3.96752e-12	2.25248e-11
ENSMUSG00000002308	Cd320	-2.62769	3.74663	3.97621e-12	2.25619e-11
ENSMUSG00000026694	Eef1aknmt	-3.30725	4.12208	3.98426e-12	2.25954e-11
ENSMUSG00000027580	Helz2	1.16497	5.35802	4.0031e-12	2.269e-11
ENSMUSG00000027433	Xrn2	-0.756701	7.50917	4.0335e-12	2.285e-11
ENSMUSG00000005417	Mprip	-0.998829	6.39343	4.04117e-12	2.28808e-11
ENSMUSG00000052040	Klf13	1.85046	6.93341	4.04329e-12	2.28808e-11
ENSMUSG00000021131	Erh	-1.11835	7.3252	4.05843e-12	2.29541e-11
ENSMUSG00000006732	Mettl1	-2.73453	4.29782	4.06595e-12	2.29842e-11
ENSMUSG00000027692	Tnik	-2.49446	4.59235	4.06871e-12	2.29874e-11
ENSMUSG00000032127	Vps11	1.27367	6.00654	4.08579e-12	2.30716e-11
ENSMUSG00000042312	S100a13	1.62813	4.85459	4.1053e-12	2.31692e-11
ENSMUSG00000090214	Gm15657	-2.97323	3.09488	4.10889e-12	2.31771e-11
ENSMUSG00000035305	Ror1	-5.88631	-1.87449	4.11341e-12	2.31901e-11
ENSMUSG00000023990	Tfeb	2.25657	3.65991	4.14126e-12	2.33346e-11
ENSMUSG00000027287	Snap23	0.907898	6.5249	4.14985e-12	2.33704e-11
ENSMUSG00000001227	Sema6b	1.25967	5.12254	4.16059e-12	2.34184e-11
ENSMUSG00000097772	5430416N02Rik	-2.03036	4.11135	4.16966e-12	2.34569e-11
ENSMUSG00000024056	Ndc80	1.20223	6.53099	4.17415e-12	2.34695e-11
ENSMUSG00000042572	Ube2q1	0.901294	7.38999	4.20282e-12	2.36181e-11
ENSMUSG00000061979	Rcc1l	-3.07265	3.86624	4.25515e-12	2.38994e-11
ENSMUSG00000111394	Gm49759	2.16436	5.23362	4.28296e-12	2.40427e-11
ENSMUSG00000027951	Adar	1.10754	6.30648	4.3073e-12	2.41665e-11
ENSMUSG00000041895	Wipi1	1.33816	5.7632	4.31382e-12	2.41901e-11
ENSMUSG00000024423	Impact	-1.3749	4.72009	4.34438e-12	2.43485e-11
ENSMUSG00000020283	Pex13	-1.11806	5.6238	4.37265e-12	2.44939e-11
ENSMUSG00000070953	Rabepk	-1.43094	4.54461	4.3817e-12	2.45314e-11
ENSMUSG00000033909	Usp36	-1.76611	5.0314	4.38987e-12	2.45641e-11
ENSMUSG00000097415	AU020206	-1.94308	5.40906	4.39225e-12	2.45643e-11
ENSMUSG00000042050	Dync2i1	-2.0755	3.11888	4.39778e-12	2.45822e-11
ENSMUSG00000021228	Acot3	-8.07782	-0.580142	4.40535e-12	2.46114e-11
ENSMUSG00000021870	Slmap	0.765946	6.93629	4.41158e-12	2.46331e-11
ENSMUSG00000007029	Vars	-1.03545	8.08317	4.43405e-12	2.47454e-11
ENSMUSG00000020380	Rad50	-0.745521	6.82704	4.44229e-12	2.47782e-11
ENSMUSG00000001794	Capns1	0.972679	7.87507	4.46521e-12	2.48928e-11
ENSMUSG00000034617	Mtrr	-1.68062	4.76667	4.48585e-12	2.49946e-11
ENSMUSG00000040852	Plekhh2	-3.14235	2.6379	4.53362e-12	2.52474e-11
ENSMUSG00000024999	Noc3l	-2.73159	4.57369	4.54102e-12	2.52752e-11
ENSMUSG00000058006	Mdn1	-1.96212	7.18041	4.56754e-12	2.54094e-11
ENSMUSG00000004897	Hdgf	-1.11191	9.05198	4.57468e-12	2.54356e-11
ENSMUSG00000117869	Snhg4	-2.84299	3.20932	4.61221e-12	2.56298e-11
ENSMUSG00000000194	Gpr107	0.994871	5.64194	4.61449e-12	2.56298e-11
ENSMUSG00000014353	Tmem87b	1.21473	5.19018	4.62593e-12	2.56798e-11
ENSMUSG00000024896	Minpp1	-1.40221	5.38869	4.63754e-12	2.57306e-11
ENSMUSG00000034424	Gcsh	-2.7072	5.03647	4.64265e-12	2.57454e-11
ENSMUSG00000024993	Dennd10	1.3574	5.02935	4.6549e-12	2.57997e-11
ENSMUSG00000004233	Wars2	-1.52022	3.36033	4.68846e-12	2.5972e-11
ENSMUSG00000015839	Nfe2l2	1.7587	7.09081	4.73334e-12	2.62068e-11
ENSMUSG00000073700	Klhl21	-1.7213	4.13089	4.74122e-12	2.62366e-11
ENSMUSG00000033991	Ttc37	-1.67407	5.12904	4.78144e-12	2.64452e-11
ENSMUSG00000037295	Ldlrap1	1.04053	6.63042	4.78852e-12	2.64649e-11
ENSMUSG00000030894	Tpp1	1.07084	7.01057	4.79004e-12	2.64649e-11
ENSMUSG00000018548	Trim37	-1.05675	6.76791	4.81144e-12	2.65692e-11
ENSMUSG00000020190	Mknk2	0.97949	7.89421	4.82842e-12	2.66489e-11
ENSMUSG00000067995	Gtf2f2	-1.15615	6.12722	4.84865e-12	2.67465e-11
ENSMUSG00000033068	Entpd6	-2.00168	4.16798	4.8596e-12	2.67929e-11
ENSMUSG00000020914	Top2a	1.01178	10.023	4.89071e-12	2.69502e-11
ENSMUSG00000054717	Hmgb2	1.17031	9.72383	4.90373e-12	2.69949e-11
ENSMUSG00000001025	S100a6	4.06345	5.278	4.90395e-12	2.69949e-11
ENSMUSG00000050144	Slc25a44	1.07958	5.36276	4.90925e-12	2.70099e-11
ENSMUSG00000029713	Gnb2	0.896726	7.77481	4.91471e-12	2.70206e-11
ENSMUSG00000019837	Gtf3c6	-1.21441	5.63011	4.91635e-12	2.70206e-11
ENSMUSG00000027332	Ivd	-0.915431	5.88141	4.92111e-12	2.70327e-11
ENSMUSG00000001517	Foxm1	0.924768	7.0971	4.93341e-12	2.7086e-11
ENSMUSG00000029723	Tsc22d4	0.809364	7.53493	4.96845e-12	2.72642e-11
ENSMUSG00000020131	Pcsk4	-3.70889	1.5776	4.98041e-12	2.73156e-11
ENSMUSG00000024976	Shoc2	1.04963	6.21514	5.04395e-12	2.76496e-11
ENSMUSG00000020212	Mdm1	1.0958	5.0756	5.06305e-12	2.77398e-11
ENSMUSG00000048490	Nrip1	-3.24113	5.00334	5.07613e-12	2.7797e-11
ENSMUSG00000033128	Gga1	0.778628	6.41312	5.08405e-12	2.78258e-11
ENSMUSG00000029387	Gtf2h3	-1.93491	3.88439	5.08805e-12	2.78332e-11
ENSMUSG00000034917	Tjp3	2.77172	3.88084	5.14978e-12	2.81562e-11
ENSMUSG00000045328	Cenpe	1.0679	7.9112	5.15612e-12	2.81763e-11
ENSMUSG00000022723	Crybg3	1.97707	4.79934	5.18275e-12	2.8307e-11
ENSMUSG00000044734	Serpinb1a	1.64406	9.68553	5.18913e-12	2.83271e-11
ENSMUSG00000032086	Bace1	-1.15221	6.278	5.19947e-12	2.83689e-11
ENSMUSG00000028467	Gba2	1.64363	5.40157	5.20468e-12	2.83825e-11
ENSMUSG00000026608	Kctd3	-1.04503	4.90103	5.22636e-12	2.84819e-11
ENSMUSG00000028211	Trp53inp1	3.70202	4.98964	5.22832e-12	2.84819e-11
ENSMUSG00000024498	Tcerg1	-1.04477	7.38957	5.24998e-12	2.8585e-11
ENSMUSG00000021392	Nol8	-2.0773	5.68117	5.26474e-12	2.86506e-11
ENSMUSG00000037315	Jade3	-1.73177	4.43446	5.28123e-12	2.87254e-11
ENSMUSG00000032216	Nedd4	-1.29041	10.0058	5.29762e-12	2.87996e-11
ENSMUSG00000044469	Tnfaip8l1	2.13013	2.9375	5.33154e-12	2.89593e-11
ENSMUSG00000069769	Msi2	-2.29782	4.84278	5.33251e-12	2.89593e-11
ENSMUSG00000055835	Zfp1	-1.87152	3.53543	5.37538e-12	2.9177e-11
ENSMUSG00000030400	Ercc2	-1.31562	5.12386	5.38968e-12	2.92396e-11
ENSMUSG00000041638	Gcn1	-1.18133	7.04804	5.4879e-12	2.97571e-11
ENSMUSG00000053801	Grwd1	-3.35001	4.28173	5.53569e-12	3.00007e-11
ENSMUSG00000033933	Vhl	1.2548	4.56969	5.54921e-12	3.00584e-11
ENSMUSG00000039756	Dnttip2	-1.05498	6.5569	5.55521e-12	3.00755e-11
ENSMUSG00000029311	Hsd17b11	0.955103	6.8143	5.57118e-12	3.01464e-11
ENSMUSG00000022793	B4galt4	-1.78108	4.34468	5.63505e-12	3.04763e-11
ENSMUSG00000067203	H2-K2	2.11562	2.36522	5.71856e-12	3.0912e-11
ENSMUSG00000009905	Kdsr	-1.3724	4.40335	5.72364e-12	3.09236e-11
ENSMUSG00000002058	Unc119	1.10852	6.10668	5.73595e-12	3.09741e-11
ENSMUSG00000040990	Sh3kbp1	0.838235	7.28672	5.74085e-12	3.09846e-11
ENSMUSG00000079227	Ccr5	4.92121	1.2033	5.75202e-12	3.1029e-11
ENSMUSG00000048307	Ankrd46	0.913462	5.58531	5.77141e-12	3.11176e-11
ENSMUSG00000007815	Rhoa	0.773657	8.77645	5.7799e-12	3.11474e-11
ENSMUSG00000026585	Kifap3	-2.00457	3.46705	5.80532e-12	3.12684e-11
ENSMUSG00000048039	Isg20l2	-1.38009	5.92034	5.811e-12	3.12829e-11
ENSMUSG00000026103	Gls	-0.991293	6.74156	5.81645e-12	3.12962e-11
ENSMUSG00000045639	Zfp629	-2.14191	3.55825	5.81994e-12	3.1298e-11
ENSMUSG00000028708	Mknk1	1.08874	6.21659	5.82275e-12	3.1298e-11
ENSMUSG00000049577	Zfpm1	-3.56531	3.56336	5.85216e-12	3.144e-11
ENSMUSG00000037649	H2-DMa	-2.6102	3.68794	5.88908e-12	3.16113e-11
ENSMUSG00000019087	Atp6ap1	0.861361	7.7744	5.89006e-12	3.16113e-11
ENSMUSG00000074039	4930520O04Rik	-4.05938	1.32861	5.92075e-12	3.17598e-11
ENSMUSG00000021125	Arg2	8.8089	-1.29102	5.95272e-12	3.1915e-11
ENSMUSG00000039242	B3galnt2	-1.12296	5.77877	6.00668e-12	3.21879e-11
ENSMUSG00000062526	Mppe1	1.06449	6.05555	6.06488e-12	3.24831e-11
ENSMUSG00000001642	Akr1b3	-1.17457	6.41902	6.07523e-12	3.2522e-11
ENSMUSG00000031610	Scrg1	8.08973	-2.02704	6.08032e-12	3.25327e-11
ENSMUSG00000036533	Cdc42ep3	1.79607	5.34144	6.14017e-12	3.28361e-11
ENSMUSG00000028970	Abcb1b	-6.03025	2.29666	6.15816e-12	3.2904e-11
ENSMUSG00000040751	Lat2	-3.39544	6.14673	6.15983e-12	3.2904e-11
ENSMUSG00000052533	Nup188	-0.951291	7.1632	6.16226e-12	3.2904e-11
ENSMUSG00000019791	Hint3	1.67976	3.55706	6.17352e-12	3.29474e-11
ENSMUSG00000022234	Cct5	-0.954778	8.88841	6.19027e-12	3.29951e-11
ENSMUSG00000028423	Nfx1	-0.672713	7.20198	6.19075e-12	3.29951e-11
ENSMUSG00000032788	Pdxk	-1.94559	5.12422	6.19189e-12	3.29951e-11
ENSMUSG00000034908	Sidt2	1.25651	6.47188	6.23604e-12	3.31937e-11
ENSMUSG00000026596	Abl2	-1.62633	5.67328	6.23739e-12	3.31937e-11
ENSMUSG00000118665	Lin54	0.865358	6.04676	6.23863e-12	3.31937e-11
ENSMUSG00000038845	Phb	-1.64289	6.6472	6.29442e-12	3.34736e-11
ENSMUSG00000031153	Gripap1	1.14593	5.88015	6.34429e-12	3.37217e-11
ENSMUSG00000097039	Pvt1	-3.48343	1.75237	6.36745e-12	3.38277e-11
ENSMUSG00000024644	Cndp2	1.52122	7.12528	6.37932e-12	3.38736e-11
ENSMUSG00000090626	Tex9	-1.84721	3.51405	6.39949e-12	3.39635e-11
ENSMUSG00000020246	Hcfc2	0.817496	5.79413	6.41316e-12	3.40189e-11
ENSMUSG00000053510	Nrd1	0.732495	8.01176	6.45197e-12	3.42075e-11
ENSMUSG00000036461	Elf1	-0.860024	7.38948	6.47924e-12	3.43347e-11
ENSMUSG00000004568	Arhgef18	0.833703	7.26158	6.48275e-12	3.4336e-11
ENSMUSG00000037419	Endod1	-1.98463	5.73441	6.49273e-12	3.43715e-11
ENSMUSG00000097572	Gm26797	3.38114	0.428599	6.50089e-12	3.43974e-11
ENSMUSG00000000486	Septin1	2.60048	4.12657	6.51605e-12	3.44603e-11
ENSMUSG00000035772	Mrps2	-1.65732	5.33587	6.54102e-12	3.45612e-11
ENSMUSG00000024528	Srfbp1	-1.48785	4.54007	6.54172e-12	3.45612e-11
ENSMUSG00000036916	Zfp280c	-2.00801	4.93912	6.56092e-12	3.46452e-11
ENSMUSG00000032554	Trf	-2.23848	6.4915	6.56695e-12	3.46597e-11
ENSMUSG00000028098	Rnf115	0.933162	6.53894	6.58669e-12	3.47463e-11
ENSMUSG00000039236	Isg20	2.41043	2.96857	6.60636e-12	3.48326e-11
ENSMUSG00000022556	Hsf1	-1.40988	5.0751	6.61444e-12	3.48414e-11
ENSMUSG00000003033	Ap1m1	0.945527	7.01404	6.61466e-12	3.48414e-11
ENSMUSG00000030659	Nucb2	1.4249	5.59483	6.77647e-12	3.56758e-11
ENSMUSG00000045817	Zfp36l2	-1.13498	7.75954	6.81485e-12	3.58599e-11
ENSMUSG00000058388	Phtf1	-1.01761	5.33257	6.88077e-12	3.61886e-11
ENSMUSG00000062157	Ifnlr1	7.34981	0.0055607	6.92053e-12	3.63795e-11
ENSMUSG00000018378	Cuedc1	-2.91566	3.84567	6.92419e-12	3.63806e-11
[truncated: 8,504 more rows]
