# Supplementary material for: Cas9+ conditionally immortalized neutrophil progenitors as a tool for genome wide CRISPR screening for neutrophil differentiation and function
Source: bioRxiv preprint, doi:10.1101/2022.07.19.500665, version 1 (2022-07-20)
Supplement: Table S2 [file 500665_file03.xlsx]

## Sheet: neg selected gene_summary
id	num	neg|score	neg|p-value	neg|fdr	neg|rank	neg|goodsgrna	neg|lfc	pos|score	pos|p-value	pos|fdr	pos|rank	pos|goodsgrna	pos|lfc
Zbtb7a	4	3.1381e-13	2.5181e-07	0.000495	1	4	-1.0612	1	1	1	19659	0	0
Wash1	4	1.3314e-10	2.5181e-07	0.000495	2	4	-2.1005	1	1	1	19658	0	0
Ikzf1	4	6.4281e-10	2.5181e-07	0.000495	3	4	-0.93292	0.99987	0.99995	1	19635	0	0
Pten	4	6.6224e-10	2.5181e-07	0.000495	4	4	-0.59948	1	1	1	19657	0	0
A230046K03Rik	4	1.2366e-09	2.5181e-07	0.000495	5	4	-3.6844	1	1	1	19656	0	0
Socs3	4	2.4787e-09	2.5181e-07	0.000495	6	4	-1.547	1	1	1	19655	0	0
F8a	4	3.5308e-09	2.5181e-07	0.000495	7	4	-1.3796	1	1	1	19654	0	0
Commd3	4	1.0097e-08	2.5181e-07	0.000495	8	4	-2.5981	1	1	1	19653	0	0
Qrsl1	4	4.1491e-08	2.5181e-07	0.000495	9	2	-0.87253	0.083939	0.10877	0.656577	3200	1	1.6057
Ep300	4	4.9999e-08	2.5181e-07	0.000495	10	3	-0.86288	0.99202	0.99246	1	19456	0	0
Arpc4	4	3.9111e-07	8.8132e-06	0.013083	11	4	-2.1671	1	1	1	19650	0	0
2010012O05Rik	4	7.1333e-07	8.8132e-06	0.013083	12	4	-1.1635	1	1	1	19652	0	0
Rnf31	4	1.1016e-06	8.8132e-06	0.013083	13	4	-1.6618	0.99992	0.99997	1	19640	0	0
Msmo1	4	1.8764e-06	9.3168e-06	0.013083	14	4	-1.6327	0.9997	0.99982	1	19625	0	0
Cebpe	4	2.5025e-06	2.795e-05	0.029084	15	3	-0.93471	0.92943	0.93011	1	18091	0	0
Fam21	4	2.5244e-06	2.795e-05	0.029084	16	4	-1.2149	1	1	1	19651	0	0
Rab21	4	3.2693e-06	2.9965e-05	0.029084	17	3	-1.0854	0.98347	0.98571	1	19280	0	0
Dnajc13	4	3.752e-06	2.9965e-05	0.029084	18	4	-2.6636	0.99991	0.99997	1	19638	0	0
Dlat	4	4.1205e-06	3.0468e-05	0.029084	19	4	-0.91008	1	1	1	19649	0	0
Slc25a1	4	5.4442e-06	3.1476e-05	0.029084	20	4	-1.1976	0.9971	0.9973	1	19562	0	0
Map3k7	4	6.9109e-06	3.349e-05	0.029084	21	4	-1.4332	0.99999	1	1	19648	0	0
Pdha1	4	6.9593e-06	3.349e-05	0.029084	22	4	-0.67245	0.99999	1	1	19647	0	0
Hspa12a	4	1.0632e-05	3.5505e-05	0.029084	23	3	-1.1743	0.88637	0.88487	1	17168	0	0
Ptpn2	4	1.1529e-05	3.5505e-05	0.029084	24	4	-0.60377	0.99999	1	1	19646	0	0
Mdh2	4	1.2682e-05	3.9533e-05	0.031089	25	4	-0.81996	0.99897	0.9991	1	19598	0	0
Vps29	4	1.6223e-05	4.457e-05	0.032946	26	4	-3.1182	0.99998	0.99999	1	19645	0	0
Spen	4	1.9261e-05	4.7591e-05	0.032946	27	3	-0.64213	0.54413	0.5408	0.951241	10818	1	0.28368
Eef1e1	4	2.0055e-05	4.8095e-05	0.032946	28	4	-1.5447	0.99998	0.99999	1	19644	0	0
Snd1	4	2.1983e-05	4.8598e-05	0.032946	29	4	-0.54938	0.99992	0.99997	1	19639	0	0
Psmb5	4	2.2221e-05	8.1837e-05	0.044822	30	3	-2.0961	0.98974	0.99075	1	19412	0	0
Rad51d	4	2.5588e-05	8.234e-05	0.044822	31	2	-1.086	0.065569	0.096334	0.650959	2790	1	1.7452
Nceh1	4	2.6181e-05	8.234e-05	0.044822	32	2	-1.143	0.5172	0.51782	0.951241	10431	1	0.45711
Pdhb	4	2.6502e-05	8.234e-05	0.044822	33	4	-0.97068	0.99943	0.99966	1	19611	0	0
Ppp6c	4	2.696e-05	8.2844e-05	0.044822	34	3	-3.2003	0.98144	0.98417	1	19230	0	0
Ankrd52	4	2.8116e-05	8.3851e-05	0.044822	35	4	-0.51526	0.99978	0.99991	1	19631	0	0
Rab1	4	2.8468e-05	8.3851e-05	0.044822	36	4	-1.7302	0.99928	0.99949	1	19606	0	0
Smok3a	4	3.2237e-05	8.4355e-05	0.044822	37	4	-0.79412	0.99997	0.99999	1	19643	0	0
Chm	4	3.9375e-05	9.342e-05	0.048332	38	4	-0.93406	0.99996	0.99998	1	19642	0	0
Ago2	4	4.5548e-05	0.00013069	0.062588	39	4	-0.58792	0.99899	0.99911	1	19600	0	0
Ccdc53	4	4.8437e-05	0.00013169	0.062588	40	3	-1.696	0.22459	0.25951	0.810039	6259	1	0.66746
E430025E21Rik	4	5.0396e-05	0.0001327	0.062588	41	3	-2.1171	0.98309	0.98538	1	19271	0	0
Susd6	4	5.4615e-05	0.00013371	0.062588	42	4	-0.54318	0.99984	0.99994	1	19633	0	0
Gm20816	3	7.4988e-05	0.00020824	0.090979	43	3	-2.8667	0.99993	0.99998	1	19641	0	0
Gnrh1	4	7.6359e-05	0.00020069	0.089671	44	2	-0.8686	0.48239	0.48989	0.951241	9975	1	0.35186
Atg16l1	4	7.6762e-05	0.00020069	0.089671	45	1	-1.1182	7.6762e-05	4.8095e-05	0.008596	104	2	0.62118
Actr3	4	8.418e-05	0.00026868	0.112727	46	3	-1.7092	0.99251	0.99274	1	19467	0	0
Fbxw21	4	9.2981e-05	0.0002717	0.112727	47	3	-0.76545	0.64888	0.62123	0.985661	12398	1	0.22419
Stambp	4	9.6635e-05	0.00027522	0.112727	48	4	-0.54167	0.9999	0.99996	1	19637	0	0
Pdp2	4	0.0001213	0.00036587	0.142982	49	2	-0.64794	0.95668	0.9616	1	18671	0	0
Fbxo28	4	0.00012409	0.00036839	0.142982	50	4	-0.52981	0.99988	0.99995	1	19636	0	0
Spdl1	4	0.00013267	0.00037091	0.142982	51	4	-1.9227	0.99987	0.99995	1	19634	0	0
Gm5460	4	0.00015029	0.0004676	0.17679	52	2	-2.5925	0.86172	0.86201	1	16639	0	0
Htt	4	0.00019233	0.0004958	0.182229	53	4	-1.0172	0.99981	0.99992	1	19632	0	0
Ptpn6	4	0.00022743	0.00052099	0.182229	54	4	-0.6896	0.99977	0.99991	1	19630	0	0
Cckbr	4	0.00023027	0.00052099	0.182229	55	1	-2.9971	0.59802	0.56223	0.951241	11600	1	0.30884
Ebp	4	0.0002377	0.00052703	0.182229	56	4	-0.72755	0.99976	0.9999	1	19629	0	0
Olfr1281	4	0.00024488	0.00053559	0.182229	57	4	-0.99617	0.99976	0.99989	1	19628	0	0
Olfr1412	4	0.00025033	0.0005376	0.182229	58	4	-0.40257	0.99975	0.99989	1	19627	0	0
Clca3a2	4	0.00025813	0.00055775	0.185853	59	3	-0.74816	0.96668	0.97014	1	18900	0	0
Egfl7	4	0.00028144	0.00059351	0.194472	60	3	-1.1007	0.69613	0.67389	0.998699	13253	1	0.2176
Rps14	4	0.0002868	0.00061214	0.195312	61	4	-2.2858	0.99971	0.99983	1	19626	0	0
2310007B03Rik	4	0.0003002	0.00062775	0.195312	62	2	-0.86953	0.88014	0.87591	1	17030	0	0
Ccdc22	4	0.00030128	0.00062825	0.195312	63	3	-0.98634	0.96941	0.97266	1	18952	0	0
S100pbp	4	0.00030362	0.00063581	0.195312	64	4	-0.79041	0.9997	0.99981	1	19624	0	0
1700021K19Rik	4	0.00034	0.00067157	0.197947	65	4	-0.45254	0.99966	0.99979	1	19623	0	0
Rbm18	4	0.00034154	0.00067157	0.197947	66	4	-0.34114	0.99966	0.99979	1	19622	0	0
Bahd1	4	0.00035247	0.00068063	0.197947	67	4	-0.37122	0.99965	0.99979	1	19621	0	0
2010002M12Rik	4	0.00035776	0.00068466	0.197947	68	4	-0.50501	0.99964	0.99979	1	19620	0	0
BC048403	4	0.00036216	0.00069473	0.197948	69	3	-0.55329	0.15639	0.18317	0.745835	4771	1	0.61948
Fam133b	4	0.00038655	0.0046989	0.676524	70	4	-0.62808	0.99961	0.99976	1	19619	0	0
Cyp51	4	0.00039729	0.0047146	0.676524	71	4	-0.80597	0.99894	0.9991	1	19596	0	0
Dppa3	4	0.00040909	0.0047146	0.676524	72	4	-0.57692	0.9984	0.99862	1	19585	0	0
Tmem120a	4	0.00041172	0.0047151	0.676524	73	3	-0.69559	0.71191	0.6968	0.998699	13565	1	0.77357
Mbd6	4	0.00041867	0.0047151	0.676524	74	4	-0.60159	0.99818	0.99833	1	19580	0	0
Kdsr	4	0.00043433	0.0047428	0.676524	75	3	-3.0016	0.96736	0.97043	1	18910	0	0
1500015O10Rik	4	0.00043493	0.0047428	0.676524	76	1	-1.6307	0.2882	0.35655	0.897147	7713	1	0.47291
Csf3r	4	0.00044654	0.0047433	0.676524	77	3	-0.90248	0.85334	0.85259	1	16465	0	0
Cyp2d34	4	0.00044758	0.0047433	0.676524	78	3	-1.0291	0.90186	0.89638	1	17501	0	0
Foxr2	4	0.0004493	0.0047433	0.676524	79	4	-0.41792	0.99955	0.99973	1	19618	0	0
Cog4	4	0.00045218	0.0047564	0.676524	80	2	-3.4792	0.70609	0.68708	0.998699	13448	1	0.43393
Fdps	4	0.00045405	0.0047564	0.676524	81	4	-1.021	0.99955	0.99973	1	19617	0	0
Rbck1	4	0.0004679	0.0048566	0.676524	82	4	-0.64871	0.99953	0.99972	1	19616	0	0
Cep68	4	0.00048056	0.0048621	0.676524	83	4	-0.4522	0.99952	0.99971	1	19615	0	0
Whrn	4	0.00048609	0.0048626	0.676524	84	2	-1.253	0.73877	0.72531	1	14152	0	0
Olfr225	4	0.00050631	0.0048787	0.676524	85	4	-0.53522	0.99949	0.99971	1	19614	0	0
Inip	4	0.00051759	0.0049019	0.676524	86	3	-0.65606	0.22632	0.26192	0.810039	6295	1	0.52052
Clec2i	4	0.00052045	0.0049019	0.676524	87	4	-0.51633	0.99948	0.99969	1	19613	0	0
Cacybp	4	0.0005231	0.0049024	0.676524	88	4	-0.63573	0.99948	0.99968	1	19612	0	0
Cyb561a3	4	0.00053724	0.004919	0.676524	89	2	-0.92141	0.43746	0.46033	0.951241	9434	1	0.37426
Rfc4	4	0.00054758	0.0049316	0.676524	90	2	-3.559	0.67531	0.64914	0.991846	12874	1	0.67144
Cog1	4	0.00057551	0.0049588	0.676524	91	3	-0.8957	0.77746	0.77473	1	14920	0	0
Szt2	4	0.0005884	0.0049679	0.676524	92	1	-1.6165	0.28271	0.35091	0.896426	7577	1	0.5087
Pomp	3	0.00061117	0.0036957	0.676524	93	3	-1.3411	0.99939	0.99967	1	19610	0	0
Tspan6	4	0.00063808	0.005053	0.676524	94	4	-0.49603	0.99936	0.99956	1	19609	0	0
Fbxo17	4	0.00063955	0.0050535	0.676524	95	1	-1.3904	0.091487	0.11903	0.686067	3357	1	1.2013
Ccnd3	4	0.00064568	0.0050625	0.676524	96	4	-1.998	0.99611	0.99628	1	19539	0	0
Slfn8	4	0.00064696	0.0050625	0.676524	97	4	-0.46294	0.99935	0.99955	1	19608	0	0
Dnmt3b	4	0.00066008	0.0050792	0.676524	98	3	-0.89836	0.81158	0.81051	1	15641	0	0
Ankrd6	4	0.00066819	0.0050928	0.676524	99	4	-0.47425	0.99933	0.99954	1	19607	0	0
Senp8	4	0.00067105	0.0050933	0.676524	100	3	-0.74473	0.94561	0.94948	1	18422	0	0
Serpinb3c	4	0.0006907	0.0051356	0.676524	101	2	-1.1242	0.038373	0.05267	0.562634	1804	2	0.67757
Slc35f2	4	0.00069364	0.0051356	0.676524	102	2	-0.8954	0.78194	0.77987	1	15020	0	0
Cyp4a12a	4	0.00071495	0.0051361	0.676524	103	3	-0.96203	0.6712	0.64593	0.991846	12810	1	0.24695
Hist1h4h	4	0.00071871	0.0051451	0.676524	104	3	-1.7443	0.87301	0.87259	1	16870	0	0
Specc1l	4	0.00073207	0.0051597	0.676524	105	3	-0.81087	0.99015	0.99098	1	19419	0	0
Olfr1044	4	0.00074185	0.0052705	0.676524	106	2	-1.2193	0.90141	0.89638	1	17492	0	0
Cbs	4	0.00074329	0.0052705	0.676524	107	3	-0.5421	0.30794	0.37169	0.901147	8057	1	0.43059
Srgn	4	0.00074853	0.0053154	0.676524	108	4	-0.48866	0.99843	0.99867	1	19586	0	0
Kbtbd7	4	0.00075004	0.0053154	0.676524	109	2	-1.2752	0.29612	0.36378	0.898538	7888	2	0.31177
Olfr1489	4	0.00076077	0.0053511	0.676524	110	3	-0.55643	0.55688	0.54744	0.951241	10995	1	0.27098
Cep162	4	0.00077034	0.0053949	0.676524	111	4	-0.49963	0.99923	0.99939	1	19605	0	0
Mtf2	4	0.00078215	0.0054126	0.676524	112	3	-0.72481	0.68664	0.65893	0.992077	13062	1	0.27445
Keap1	4	0.00079464	0.0054292	0.676524	113	3	-1.6765	0.88213	0.87926	1	17071	0	0
Fam198b	4	0.00079549	0.0054292	0.676524	114	4	-0.34045	0.9992	0.99937	1	19604	0	0
F2rl2	4	0.00081469	0.0054659	0.676524	115	3	-0.56913	0.98261	0.98471	1	19256	0	0
Lrrn3	4	0.00081803	0.0054664	0.676524	116	4	-0.35343	0.99918	0.99933	1	19603	0	0
Cbx1	4	0.00083549	0.0054901	0.676524	117	4	-0.40469	0.99916	0.9993	1	19602	0	0
Gm11710	4	0.00084282	0.0055062	0.676524	118	3	-0.73151	0.61969	0.57868	0.951241	11945	1	0.24044
Racgap1	3	0.00084847	0.0039027	0.676524	119	3	-1.4365	0.99915	0.99958	1	19601	0	0
Hnmt	4	0.00085713	0.0055178	0.676524	120	3	-0.57127	0.99103	0.99159	1	19431	0	0
Tssc4	4	0.00086006	0.0055178	0.676524	121	3	-0.55906	0.94202	0.94598	1	18339	0	0
Zfhx2	4	0.00086836	0.0055178	0.676524	122	3	-0.71742	0.59422	0.56062	0.951241	11542	1	0.25197
Pcolce2	4	0.00087699	0.0055183	0.676524	123	3	-0.70774	0.92064	0.91975	1	17927	0	0
Ncoa5	4	0.00089529	0.0055536	0.676524	124	1	-1.9447	0.92083	0.91975	1	17936	0	0
Atp6v1d	4	0.00093554	0.0055934	0.676524	125	3	-1.8306	0.61609	0.57868	0.951241	11884	1	0.53677
Olfr780	4	0.00095714	0.005614	0.676524	126	3	-0.52163	0.97922	0.98215	1	19171	0	0
Cbln2	4	0.00095828	0.005614	0.676524	127	3	-0.52505	0.48619	0.49318	0.951241	10020	1	0.33592
Grxcr2	4	0.00098373	0.0056306	0.676524	128	2	-0.75523	0.7536	0.74883	1	14450	0	0
Rab35	4	0.0010143	0.0058668	0.676524	129	3	-1.3801	0.59122	0.56062	0.951241	11501	1	0.24423
Pole	3	0.0010249	0.0040538	0.676524	130	3	-1.4584	0.99898	0.99942	1	19599	0	0
Brat1	4	0.0010304	0.0058829	0.676524	131	4	-0.48659	0.99897	0.9991	1	19597	0	0
Tktl2	4	0.0010584	0.0059081	0.676524	132	4	-0.53806	0.99858	0.99883	1	19588	0	0
Smn1	4	0.0010585	0.0059081	0.676524	133	3	-1.1688	0.46269	0.47665	0.951241	9748	1	0.57438
Gpr82	4	0.0010887	0.0059509	0.676524	134	2	-0.88472	0.96232	0.96838	1	18810	0	0
Pygl	4	0.0010998	0.0059514	0.676524	135	2	-0.78842	0.84182	0.83667	1	16240	0	0
Nadk	4	0.0011087	0.0059771	0.676524	136	4	-0.65806	0.99889	0.99905	1	19595	0	0
Tbcb	3	0.001122	0.0041742	0.676524	137	2	-1.3481	0.77853	0.77972	1	14945	0	0
Pgpep1	4	0.001151	0.0060516	0.676524	138	1	-1.2559	0.5993	0.56388	0.951241	11615	1	0.26525
Nae1	4	0.0011664	0.0060929	0.676524	139	4	-1.1837	0.99664	0.997	1	19549	0	0
Ctif	4	0.0011739	0.0060929	0.676524	140	4	-0.44529	0.99883	0.99897	1	19594	0	0
Zfp54	4	0.0011844	0.0060934	0.676524	141	3	-0.63927	0.23385	0.275	0.831629	6467	1	0.50475
Scaf4	4	0.0011984	0.0060934	0.676524	142	4	-0.32878	0.9988	0.99897	1	19593	0	0
Lhfpl1	4	0.0012213	0.0061156	0.676524	143	3	-0.58619	0.11015	0.13983	0.713923	3750	1	0.65471
Akr1e1	4	0.0012225	0.0061156	0.676524	144	2	-0.90237	0.58079	0.55733	0.951241	11345	1	0.3027
Mpp7	4	0.0012484	0.0061398	0.676524	145	2	-0.74785	0.71958	0.69847	0.998699	13723	0	0
Bmp5	4	0.0012605	0.0061675	0.676524	146	4	-0.44743	0.99874	0.99891	1	19592	0	0
Rd3l	4	0.0012724	0.0062858	0.676524	147	3	-0.64878	0.37084	0.42574	0.94913	8660	1	0.37564
Cntf	4	0.0012768	0.0062863	0.676524	148	2	-0.54947	0.92153	0.92093	1	17949	0	0
Tomm22	4	0.0012848	0.006307	0.676524	149	4	-1.6516	0.99872	0.99889	1	19591	0	0
Zfml	4	0.0013044	0.006307	0.676524	150	1	-1.2344	0.72644	0.70823	0.998699	13879	0	0
Commd2	4	0.0013077	0.006307	0.676524	151	3	-1.1148	0.98283	0.98538	1	19259	0	0
Chpf2	4	0.0013166	0.0063075	0.676524	152	3	-0.71759	0.91657	0.91228	1	17833	0	0
Gm20767	4	0.0013433	0.0063075	0.676524	153	3	-1.282	0.92991	0.93011	1	18103	0	0
Vmn2r29	4	0.0013433	0.0063075	0.676524	154	3	-1.7161	0.055828	0.079617	0.631919	2453	1	2.1918
Acot5	4	0.001348	0.0063075	0.676524	155	4	-0.53046	0.99865	0.99889	1	19590	0	0
Olfr723	4	0.0013648	0.0063322	0.676524	156	3	-0.5965	0.83989	0.83146	1	16205	0	0
Ezh2	4	0.0013661	0.0063322	0.676524	157	3	-0.92711	0.63904	0.61633	0.984936	12253	1	0.30553
Arhgap33	4	0.0013786	0.0063327	0.676524	158	2	-0.86664	0.7663	0.75721	1	14708	0	0
Top2a	3	0.0013807	0.0042603	0.676524	159	2	-3.5681	0.14834	0.17702	0.745835	4588	1	1.6446
Olfr103	4	0.0013924	0.0063327	0.676524	160	4	-0.68135	0.99861	0.99887	1	19589	0	0
Scgb2b12	4	0.0014455	0.0065618	0.676524	161	2	-2.4122	0.95273	0.9587	1	18584	0	0
Lrrc29	4	0.0014692	0.0066101	0.676524	162	3	-0.48122	0.75502	0.75169	1	14483	0	0
Ercc6l2	4	0.0014974	0.0066937	0.676524	163	3	-0.58162	0.48395	0.48989	0.951241	9997	1	0.29542
Cdk5r1	4	0.0015088	0.0067204	0.676524	164	3	-0.61656	0.4231	0.45211	0.950867	9256	1	0.34293
Slc6a19	4	0.0015391	0.0067209	0.676524	165	3	-0.47994	0.69096	0.66719	0.995374	13152	1	0.2111
Opalin	4	0.0015464	0.0067209	0.676524	166	4	-0.34906	0.99845	0.99867	1	19587	0	0
Cldn11	4	0.0015612	0.0067209	0.676524	167	3	-0.59121	0.99525	0.99544	1	19523	0	0
Hps6	4	0.0015754	0.0067209	0.676524	168	3	-0.75073	0.79862	0.79736	1	15364	0	0
Hoxa10	4	0.0015873	0.0067713	0.676524	169	3	-0.74837	0.90823	0.90148	1	17637	0	0
Scgb1b2	4	0.001595	0.0067713	0.676524	170	2	-2.914	0.50846	0.51296	0.951241	10320	1	0.38495
Slc38a7	4	0.0015961	0.0067713	0.676524	171	3	-0.55855	0.062379	0.094614	0.650959	2693	1	0.8384
Tab2	4	0.0016023	0.0067718	0.676524	172	3	-0.78782	0.9166	0.91228	1	17834	0	0
Zfp521	4	0.0016048	0.0067718	0.676524	173	2	-0.67309	0.46548	0.48162	0.951241	9784	1	0.34567
Hscb	4	0.0016109	0.0067718	0.676524	174	3	-2.1423	0.89173	0.88802	1	17294	0	0
B430306N03Rik	4	0.0016162	0.0067718	0.676524	175	4	-0.53149	0.99838	0.99862	1	19584	0	0
Cs	4	0.0016493	0.0068932	0.676524	176	4	-0.87689	0.99799	0.99819	1	19578	0	0
Osmr	4	0.0016932	0.0069863	0.676524	177	3	-0.47972	0.62398	0.58519	0.958106	12012	1	0.24775
Rdh7	4	0.0017274	0.0069868	0.676524	178	4	-0.50085	0.99827	0.99852	1	19583	0	0
Adar	4	0.0017451	0.0070825	0.676524	179	2	-1.2318	0.88257	0.88003	1	17082	0	0
Rbm26	4	0.0017503	0.0071515	0.676524	180	2	-0.6446	0.79936	0.79859	1	15377	0	0
Irf2	4	0.001758	0.0071792	0.676524	181	4	-0.40239	0.99824	0.99843	1	19582	0	0
Sesn3	4	0.0017644	0.0071797	0.676524	182	3	-0.64431	0.95844	0.96335	1	18720	0	0
Kirrel	4	0.001788	0.0072674	0.676524	183	4	-0.395	0.99821	0.99834	1	19581	0	0
Uts2r	4	0.0017888	0.0072674	0.676524	184	3	-0.65693	0.98588	0.98793	1	19327	0	0
Olfr110	3	0.0018	0.007363	0.676524	185	2	-0.7763	0.67405	0.66959	0.997663	12853	0	0
Cdk2ap1	4	0.0018001	0.0072674	0.676524	186	3	-0.77067	0.52484	0.526	0.951241	10539	1	0.27129
Farsb	4	0.0018634	0.0073268	0.676524	187	3	-2.6743	0.80606	0.80582	1	15514	0	0
Arpc3	4	0.0018666	0.0073268	0.676524	188	3	-1.4093	0.93378	0.93539	1	18180	0	0
Fam20b	4	0.0018924	0.0074089	0.676524	189	3	-0.49752	0.98667	0.98866	1	19352	0	0
Tbcel	4	0.0019019	0.0074094	0.676524	190	2	-0.84513	0.78065	0.77861	1	14993	0	0
Cdh24	4	0.0019121	0.0074471	0.676524	191	3	-0.46214	0.98862	0.98975	1	19388	0	0
Gpr151	4	0.0019368	0.0074471	0.676524	192	2	-1.0335	0.74283	0.72684	1	14227	0	0
G6pdx	4	0.0019593	0.0074476	0.676524	193	3	-0.61461	0.83656	0.83146	1	16139	0	0
Clip4	4	0.0019611	0.0074476	0.676524	194	2	-0.92032	0.46867	0.48162	0.951241	9824	1	0.45095
Vmn1r121	4	0.0019638	0.0074476	0.676524	195	2	-1.8659	0.89074	0.88723	1	17271	0	0
Ccnf	4	0.0019653	0.0074476	0.676524	196	4	-0.54863	0.99764	0.99776	1	19571	0	0
Hspe1	4	0.0019937	0.0074789	0.676524	197	2	-3.8658	0.89965	0.89487	1	17464	0	0
Eprs	4	0.0019937	0.0074789	0.676524	198	3	-1.8653	0.21831	0.24764	0.793576	6120	1	0.63796
Slc15a3	4	0.0020104	0.0074789	0.676524	199	4	-0.41541	0.99799	0.99819	1	19579	0	0
Gm5150	4	0.002053	0.0075131	0.676524	200	4	-0.79836	0.99795	0.99815	1	19577	0	0
Il17rb	4	0.002071	0.0075534	0.676524	201	1	-1.041	0.26	0.31704	0.872746	7054	2	0.2376
Zfp952	3	0.0020855	0.0077463	0.676524	202	3	-0.67252	0.99791	0.99881	1	19576	0	0
Olfr711	4	0.002089	0.0075539	0.676524	203	3	-0.52876	0.81766	0.81509	1	15773	0	0
Dmbx1	4	0.0020929	0.0075539	0.676524	204	3	-0.54217	0.90426	0.89788	1	17544	0	0
Pzp	4	0.0020963	0.0076874	0.676524	205	4	-0.42375	0.9979	0.99811	1	19575	0	0
Srpk1	4	0.0021184	0.0077946	0.676524	206	2	-0.65002	0.52059	0.52272	0.951241	10476	1	0.33596
Pbld1	4	0.0021212	0.0078304	0.676524	207	2	-0.67745	0.0091037	0.017716	0.421203	763	2	0.89549
D17Wsu92e	4	0.0021221	0.0078304	0.676524	208	2	-0.86866	0.44477	0.4685	0.951241	9531	1	0.3504
4933433C11Rik	4	0.002143	0.0078631	0.676524	209	3	-0.63447	0.71994	0.70011	0.998699	13729	0	0
Micu1	4	0.002152	0.0078989	0.676524	210	4	-0.3412	0.99785	0.99792	1	19574	0	0
Eed	4	0.0021921	0.0079351	0.676524	211	3	-1.2687	0.96911	0.9721	1	18946	0	0
Ankfy1	4	0.0022243	0.0080439	0.676524	212	3	-0.51274	0.96514	0.96958	1	18865	0	0
Padi4	4	0.0022352	0.0080444	0.676524	213	2	-0.91349	0.62888	0.59988	0.974903	12087	1	0.27305
Ssu72	4	0.0022865	0.0081356	0.676524	214	3	-2.2803	0.86661	0.86739	1	16748	0	0
Krtap6-2	4	0.0023108	0.0082152	0.676524	215	2	-2.1719	0.19094	0.21506	0.747354	5536	1	0.86749
Osbpl8	4	0.0023285	0.0082152	0.676524	216	3	-0.75062	0.46253	0.47665	0.951241	9746	1	0.44211
Pate4	4	0.0023314	0.0082157	0.676524	217	3	-0.71972	0.91839	0.91614	1	17876	0	0
Sult6b1	4	0.0023491	0.0082157	0.676524	218	2	-0.83681	0.27725	0.34086	0.891497	7463	2	0.35707
Fam151b	4	0.0023557	0.0082157	0.676524	219	4	-0.25852	0.99764	0.99776	1	19573	0	0
Trim12a	4	0.0023611	0.0082157	0.676524	220	3	-0.60626	0.17196	0.20252	0.747354	5102	1	0.7433
Tubb3	4	0.0023639	0.0082157	0.676524	221	4	-0.54303	0.99764	0.99776	1	19572	0	0
Sp8	4	0.0023871	0.01199	0.676524	222	4	-0.47331	0.99761	0.99771	1	19570	0	0
Stx4a	3	0.002397	0.0081814	0.676524	223	3	-1.2301	0.99187	0.99276	1	19451	0	0
Lnpep	4	0.0024126	0.012035	0.676524	224	4	-0.42409	0.99759	0.99767	1	19569	0	0
Elovl1	4	0.002431	0.012035	0.676524	225	4	-0.9515	0.99757	0.99767	1	19568	0	0
Arpc2	4	0.0024447	0.012035	0.676524	226	4	-1.3601	0.99581	0.99585	1	19533	0	0
Cdk5r2	4	0.0024797	0.012035	0.676524	227	1	-0.93295	0.8049	0.80582	1	15497	0	0
Skap2	4	0.0024958	0.012035	0.676524	228	4	-0.31057	0.9975	0.99767	1	19567	0	0
Zfp791	4	0.0025283	0.012035	0.676524	229	4	-0.35606	0.99747	0.99767	1	19566	0	0
Znhit2	3	0.0025344	0.0083134	0.676524	230	3	-1.1926	0.99747	0.99821	1	19565	0	0
Ddx23	3	0.0025743	0.0083134	0.676524	231	2	-2.3548	0.10556	0.11754	0.683038	3653	1	1.8151
Obsl1	4	0.0026039	0.012112	0.676524	232	2	-0.65317	0.27916	0.34823	0.896426	7502	1	0.53204
Npcd	4	0.0026064	0.012112	0.676524	233	3	-0.58375	0.60679	0.56873	0.951241	11737	1	0.2367
Serpina3a	4	0.0026086	0.012112	0.676524	234	3	-0.61941	0.88447	0.88246	1	17129	0	0
Diexf	3	0.0026252	0.0084433	0.676524	235	2	-1.8559	0.54156	0.51462	0.951241	10774	1	0.87762
Cdc42se1	4	0.002633	0.012113	0.676524	236	1	-0.54469	0.12964	0.15498	0.721856	4173	2	0.44604
Ddx11	4	0.0026695	0.012155	0.676524	237	3	-1.5749	0.82846	0.82178	1	15990	0	0
Reep2	4	0.0026758	0.012155	0.676524	238	3	-0.63073	0.99224	0.99256	1	19460	0	0
Vmn2r109	3	0.0027035	0.0085375	0.676524	239	2	-0.76715	0.93384	0.94135	1	18181	0	0
Cd151	4	0.0027203	0.012155	0.676524	240	3	-0.52967	0.9053	0.89861	1	17568	0	0
Psma5	4	0.0027217	0.012204	0.676524	241	3	-2.7459	0.10717	0.13344	0.706918	3684	1	1.8773
Samsn1	4	0.0027936	0.012415	0.676524	242	3	-0.81407	0.79877	0.79736	1	15366	0	0
G3bp1	4	0.0028093	0.012415	0.676524	243	4	-0.54015	0.99719	0.99734	1	19564	0	0
Sptlc2	4	0.0028373	0.012416	0.676524	244	3	-1.6288	0.99503	0.99509	1	19515	0	0
Lacc1	4	0.0028385	0.012416	0.676524	245	3	-0.62469	0.91188	0.9043	1	17731	0	0
Scp2	4	0.0028432	0.012416	0.676524	246	4	-0.36228	0.99716	0.99734	1	19563	0	0
Olfr710	4	0.0028444	0.012416	0.676524	247	3	-0.56668	0.98779	0.9888	1	19369	0	0
Psmd8	4	0.0028583	0.012455	0.676524	248	3	-1.454	0.27601	0.34086	0.891497	7430	1	0.90311
Htr5a	4	0.0028795	0.012507	0.676524	249	3	-0.51022	0.89965	0.89487	1	17453	0	0
Il20rb	4	0.0029394	0.012604	0.676524	250	1	-1.3164	0.67943	0.65239	0.992077	12933	1	0.24541
Crisp3	4	0.0029778	0.012649	0.676524	251	4	-0.38244	0.99702	0.9972	1	19561	0	0
Zfp616	4	0.0029919	0.012649	0.676524	252	4	-0.33929	0.99701	0.9972	1	19560	0	0
Defb3	4	0.0030001	0.012649	0.676524	253	4	-0.31035	0.997	0.9972	1	19559	0	0
A2m	4	0.003053	0.01265	0.676524	254	3	-0.50908	0.19634	0.21808	0.747354	5639	1	0.6331
Heyl	4	0.0030689	0.012698	0.676524	255	3	-0.75013	0.89515	0.89261	1	17364	0	0
Telo2	4	0.0030861	0.012699	0.676524	256	3	-2.3769	0.50097	0.51131	0.951241	10220	1	0.82807
Tuba1b	3	0.0031164	0.0087988	0.676524	257	2	-3.0704	0.85765	0.8584	1	16550	0	0
Ooep	4	0.0031246	0.012743	0.676524	258	4	-0.49641	0.99688	0.99716	1	19558	0	0
Lhx8	4	0.0031268	0.012743	0.676524	259	3	-0.56416	0.89469	0.89185	1	17356	0	0
Arhgap11a	4	0.0031777	0.012795	0.676524	260	4	-0.36769	0.99682	0.9971	1	19557	0	0
Olfr1316	4	0.0032059	0.012795	0.676524	261	4	-0.37823	0.99679	0.9971	1	19556	0	0
1810062G17Rik	4	0.0032218	0.012795	0.676524	262	4	-0.32105	0.99678	0.9971	1	19555	0	0
Scfd1	3	0.0032374	0.0088487	0.676524	263	2	-2.3937	0.81125	0.80616	1	15627	0	0
4930558K02Rik	4	0.0032434	0.012843	0.676524	264	3	-0.69303	0.65195	0.62617	0.988026	12450	1	0.29586
Mfap1b	4	0.0032457	0.012843	0.676524	265	3	-2.7303	0.81457	0.81509	1	15701	0	0
Mpc1	4	0.0032607	0.012894	0.676524	266	4	-0.36153	0.99674	0.99705	1	19554	0	0
Nanog	4	0.0032718	0.012895	0.676524	267	2	-0.83503	0.95838	0.96335	1	18719	0	0
Zfp820	4	0.0032873	0.012932	0.676524	268	4	-0.27182	0.99671	0.997	1	19553	0	0
Il23r	4	0.0032932	0.012932	0.676524	269	3	-0.48431	0.97754	0.98115	1	19126	0	0
Olfr1323	4	0.0032954	0.012932	0.676524	270	4	-0.27604	0.9967	0.997	1	19552	0	0
Nags	4	0.0032968	0.012932	0.676524	271	2	-0.74835	0.67556	0.64914	0.991846	12876	1	0.22626
Gas2l1	4	0.0032993	0.012932	0.676524	272	4	-0.36767	0.9967	0.997	1	19551	0	0
2410004B18Rik	4	0.0033432	0.012987	0.676524	273	4	-0.34159	0.99666	0.997	1	19550	0	0
Cpne8	4	0.0033478	0.013032	0.676524	274	1	-1.1723	0.27793	0.34259	0.894476	7472	2	0.24303
2610528A11Rik	4	0.0033797	0.013067	0.676524	275	3	-0.56221	0.98622	0.98837	1	19341	0	0
Gfral	4	0.0033944	0.013067	0.676524	276	3	-0.52089	0.79242	0.7875	1	15241	0	0
Actr2	4	0.0033989	0.013067	0.676524	277	3	-2.0083	0.98913	0.99001	1	19400	0	0
9430016H08Rik	4	0.0034499	0.013124	0.676524	278	2	-1.2077	0.64099	0.61633	0.984936	12283	1	0.28282
Snx2	4	0.0034512	0.013124	0.676524	279	3	-0.78896	0.99504	0.99515	1	19516	0	0
Pfdn6	3	0.0034694	0.0092128	0.676524	280	3	-1.2192	0.99653	0.99754	1	19548	0	0
Ogfrl1	4	0.0034841	0.013172	0.676524	281	4	-0.31294	0.99652	0.99685	1	19547	0	0
Vldlr	4	0.0034929	0.013173	0.676524	282	4	-0.35607	0.99651	0.99685	1	19546	0	0
Vps13d	4	0.003517	0.013281	0.676524	283	3	-0.93723	0.68148	0.65562	0.992077	12968	1	0.35272
Ms4a4b	4	0.0035192	0.013281	0.676524	284	2	-0.83426	0.51459	0.51459	0.951241	10396	1	0.40746
Sept1	4	0.003552	0.013441	0.676524	285	1	-1.272	0.4665	0.48162	0.951241	9794	1	0.3682
Fam83g	4	0.0036159	0.013498	0.676524	286	4	-0.33975	0.99638	0.99668	1	19545	0	0
Ces3a	4	0.0036242	0.013498	0.676524	287	4	-0.31126	0.99638	0.99668	1	19544	0	0
Psg25	4	0.0036425	0.013565	0.676524	288	3	-0.62007	0.70905	0.69193	0.998699	13507	1	0.25455
Gm4791	4	0.0036541	0.013623	0.676524	289	1	-1.4469	0.011975	0.020439	0.439531	879	3	0.36867
Lrrd1	4	0.0036804	0.013786	0.676524	290	4	-0.30402	0.99632	0.9965	1	19543	0	0
Rbbp4	4	0.0036904	0.013787	0.676524	291	4	-0.92279	0.99631	0.9965	1	19542	0	0
Olfr1066	4	0.0036923	0.013787	0.676524	292	3	-1.0068	0.80846	0.80815	1	15571	0	0
Ddo	4	0.0037435	0.013893	0.676524	293	4	-0.53566	0.99626	0.99639	1	19541	0	0
Chrm3	4	0.0037869	0.013894	0.676524	294	3	-0.54304	0.33235	0.38806	0.914344	8293	1	0.38557
Dsn1	4	0.003815	0.014028	0.676524	295	3	-0.67166	0.92525	0.92503	1	18013	0	0
Mina	4	0.0038582	0.014077	0.676524	296	2	-1.0683	0.55175	0.54578	0.951241	10916	1	0.34378
Lyrm4	4	0.0038754	0.014077	0.676524	297	4	-1.4145	0.99612	0.99633	1	19540	0	0
Dll3	4	0.0039093	0.014198	0.676524	298	1	-1.1113	0.16621	0.19606	0.747354	4974	1	0.6944
Tmem131	4	0.0039288	0.014304	0.676524	299	3	-0.68172	0.85588	0.85451	1	16515	0	0
Apcdd1	4	0.003936	0.014305	0.676524	300	3	-0.47662	0.63615	0.6098	0.981953	12207	1	0.32679
Tacr3	4	0.0039418	0.01436	0.676524	301	3	-0.59095	0.54143	0.53753	0.951241	10769	1	0.30174
Cdk10	3	0.0039673	0.0099179	0.676524	302	2	-0.74515	0.98081	0.98094	1	19216	0	0
Olfr194	4	0.0039757	0.01436	0.676524	303	4	-0.42364	0.99602	0.9961	1	19538	0	0
Ccni	4	0.0039808	0.01436	0.676524	304	3	-0.4909	0.97186	0.97597	1	19009	0	0
Map3k12	3	0.0039876	0.0099763	0.676524	305	3	-0.42845	0.99601	0.99694	1	19537	0	0
Lhx5	4	0.0040025	0.014481	0.676524	306	3	-0.484	0.89834	0.89416	1	17439	0	0
Mkl2	4	0.0040049	0.014481	0.676524	307	4	-0.38612	0.996	0.99597	1	19536	0	0
Nynrin	4	0.0040055	0.014481	0.676524	308	2	-0.89531	0.39762	0.44061	0.94913	8947	1	0.33674
Olfr340	4	0.0040623	0.01468	0.676524	309	1	-4.7005	0.59981	0.56554	0.951241	11627	1	0.47889
Dhrs7b	4	0.004067	0.01468	0.676524	310	3	-1.444	0.99173	0.99224	1	19445	0	0
Trappc1	3	0.0040825	0.010193	0.676524	311	3	-1.7467	0.99592	0.99683	1	19535	0	0
Wdr81	4	0.0041133	0.014735	0.676524	312	3	-0.73369	0.99291	0.99333	1	19478	0	0
Myo3b	4	0.0041161	0.014735	0.676524	313	4	-0.43672	0.99588	0.99591	1	19534	0	0
BC048679	4	0.0041199	0.014736	0.676524	314	3	-0.51553	0.96555	0.97	1	18871	0	0
Zfp119b	4	0.0041303	0.014792	0.676524	315	3	-0.81534	0.95615	0.9616	1	18665	0	0
Msi2	4	0.0041348	0.014792	0.676524	316	2	-0.58374	0.38111	0.43072	0.94913	8757	1	0.48662
1110051M20Rik	4	0.0041526	0.014792	0.676524	317	3	-0.36957	0.92851	0.93011	1	18075	0	0
Cts3	4	0.0041644	0.014792	0.676524	318	2	-0.72875	0.71216	0.6968	0.998699	13568	1	0.23005
Krt222	4	0.0042154	0.014793	0.676524	319	2	-0.57032	0.80045	0.79859	1	15404	0	0
Olfr1462	4	0.0042154	0.014793	0.676524	320	3	-0.68084	0.99534	0.99565	1	19524	0	0
Ces2a	4	0.0042502	0.014862	0.676524	321	2	-1.6801	0.79703	0.79244	1	15335	0	0
Cinp	3	0.004261	0.01043	0.676524	322	3	-0.92045	0.99574	0.99658	1	19532	0	0
St7	4	0.0042637	0.014862	0.676524	323	3	-0.47775	0.92884	0.93011	1	18082	0	0
Elovl5	4	0.0042664	0.014862	0.676524	324	1	-0.92528	0.9429	0.94689	1	18363	0	0
Pilra	4	0.0042909	0.014917	0.676524	325	4	-0.38955	0.99571	0.99578	1	19531	0	0
Lman1	4	0.0043174	0.014917	0.676524	326	1	-1.0562	0.71899	0.69847	0.998699	13709	0	0
9430020K01Rik	4	0.0043214	0.014917	0.676524	327	2	-0.87549	0.12728	0.15498	0.721856	4114	1	0.6915
Olfr67	4	0.0043292	0.014917	0.676524	328	3	-0.5264	0.78069	0.77861	1	14994	0	0
Las1l	3	0.0043605	0.010551	0.676524	329	2	-2.8724	0.10283	0.11479	0.677735	3600	1	0.71011
Gm4175	3	0.0043605	0.010551	0.676524	330	2	-3.2264	0.9552	0.96093	1	18643	0	0
Qk	4	0.0043612	0.014917	0.676524	331	2	-1.1538	0.91623	0.91228	1	17824	0	0
Tm4sf4	4	0.0043684	0.014917	0.676524	332	2	-0.7693	0.88845	0.88644	1	17217	0	0
Gm4884	4	0.0044247	0.014918	0.676524	333	3	-0.64698	0.9764	0.98073	1	19100	0	0
Zcchc7	4	0.0044332	0.014918	0.676524	334	2	-0.77233	0.28808	0.35655	0.897147	7708	2	0.26886
Zfp386	4	0.0044466	0.014918	0.676524	335	4	-0.30252	0.99555	0.99578	1	19530	0	0
Lgsn	4	0.0044554	0.014918	0.676524	336	4	-0.3203	0.99554	0.99578	1	19529	0	0
Gm597	4	0.0044704	0.014918	0.676524	337	2	-0.60608	0.96074	0.96589	1	18777	0	0
Oraov1	4	0.0044735	0.014918	0.676524	338	3	-2.0266	0.13591	0.17079	0.745835	4306	1	1.8133
Slc5a2	4	0.0045042	0.014975	0.676524	339	3	-0.46311	0.99481	0.99494	1	19511	0	0
Olfr835	4	0.0045136	0.014975	0.676524	340	3	-0.48521	0.84209	0.83667	1	16248	0	0
Gzmk	4	0.0045214	0.014975	0.676524	341	1	-0.9456	0.58662	0.55896	0.951241	11424	1	0.31966
Slc26a2	4	0.0045689	0.014976	0.676524	342	3	-0.56343	0.17869	0.20569	0.747354	5263	1	0.59758
Dsel	4	0.0045724	0.014976	0.676524	343	1	-1.3352	0.27374	0.33687	0.88814	7380	2	0.35958
Tspan5	4	0.004575	0.014976	0.676524	344	2	-0.61995	0.27414	0.33687	0.88814	7390	1	0.42401
Vmn2r60	4	0.0046077	0.015101	0.676524	345	3	-1.9667	0.67111	0.64593	0.991846	12808	1	0.23539
C87414	4	0.0046077	0.015101	0.676524	346	2	-3.2404	0.010069	0.018086	0.421203	804	1	3.1228
1810037I17Rik	4	0.0046234	0.015101	0.676524	347	2	-1.1519	0.57281	0.55733	0.951241	11216	1	0.38406
Usp43	4	0.0046744	0.015101	0.676524	348	2	-0.88188	0.7824	0.77987	1	15033	0	0
S1pr2	4	0.0046886	0.015101	0.676524	349	3	-0.4831	0.98933	0.99014	1	19404	0	0
Hist1h2bj	2	0.0047665	0.0087288	0.676524	350	1	-3.997	0.50313	0.49659	0.951241	10246	0	0
Gjb1	4	0.0047764	0.015102	0.676524	351	2	-0.57968	0.08058	0.10536	0.650959	3124	1	0.8845
Slc35f6	4	0.004777	0.015102	0.676524	352	2	-0.81921	0.60865	0.57039	0.951241	11769	1	0.2409
Gm6377	4	0.0047777	0.015102	0.676524	353	3	-0.43017	0.85861	0.85926	1	16567	0	0
Zbtb25	4	0.0047812	0.015102	0.676524	354	2	-0.70998	0.96501	0.96958	1	18864	0	0
Krit1	4	0.0047883	0.015102	0.676524	355	3	-0.77724	0.82496	0.81847	1	15915	0	0
Bex6	4	0.0048274	0.015102	0.676524	356	1	-1.5708	0.70762	0.6887	0.998699	13482	1	0.23945
Gbp6	4	0.0048597	0.015168	0.676524	357	3	-0.87597	0.5794	0.55733	0.951241	11326	1	0.31477
Prss52	4	0.0048691	0.015168	0.676524	358	2	-0.66198	0.072481	0.10276	0.650959	2945	2	0.50898
Csnk2a1	4	0.0048784	0.015168	0.676524	359	1	-0.82128	0.36801	0.42077	0.94913	8633	1	0.40709
Sema3b	4	0.0048943	0.015168	0.676524	360	3	-0.62756	0.99023	0.9911	1	19423	0	0
Dis3	2	0.004913	0.0087288	0.676524	361	2	-1.9636	0.99509	0.99715	1	19517	0	0
Ahcyl2	4	0.0049294	0.015168	0.676524	362	1	-0.7664	0.75948	0.75443	1	14573	0	0
Il4ra	4	0.0049804	0.015168	0.676524	363	2	-0.39103	0.9826	0.98471	1	19255	0	0
4930467E23Rik	4	0.0050088	0.015168	0.676524	364	2	-2.1131	0.89173	0.88802	1	17298	0	0
Fam187a	4	0.0050131	0.015168	0.676524	365	2	-0.69777	0.22839	0.26192	0.810039	6338	1	0.51067
Kpnb1	3	0.0050217	0.011815	0.676524	366	2	-1.898	0.14834	0.17702	0.745835	4587	1	1.6446
Pfkp	4	0.0050465	0.015168	0.676524	367	3	-0.65082	0.87578	0.87342	1	16927	0	0
Daglb	3	0.0050477	0.011815	0.676524	368	2	-1.0223	0.68939	0.68232	0.998699	13116	0	0
Cdyl	4	0.0050617	0.015168	0.676524	369	3	-0.38676	0.97494	0.97944	1	19070	0	0
Prr30	4	0.0050644	0.015168	0.676524	370	2	-0.74155	0.28079	0.34823	0.896426	7539	2	0.22914
Psmd1	3	0.0051122	0.011816	0.676524	371	3	-1.102	0.98854	0.98935	1	19385	0	0
Nhlrc2	4	0.0051333	0.015234	0.676524	372	1	-0.8105	0.036582	0.049045	0.542313	1748	3	0.33108
Lrrc61	4	0.0051374	0.015234	0.676524	373	2	-2.0267	0.23059	0.26748	0.819496	6393	2	0.31367
Steap3	4	0.0051843	0.015234	0.676524	374	2	-1.3169	0.97947	0.98215	1	19179	0	0
Chd5	4	0.0051862	0.015234	0.676524	375	3	-0.43738	0.55294	0.54744	0.951241	10938	1	0.30093
Arhgap25	4	0.0052051	0.015234	0.676524	376	3	-0.41424	0.91221	0.90496	1	17741	0	0
Pqlc2	4	0.0052448	0.015234	0.676524	377	3	-0.42646	0.97179	0.97597	1	19006	0	0
Tmed9	4	0.005276	0.015234	0.676524	378	3	-0.70953	0.97422	0.97856	1	19053	0	0
Vmn1r151	4	0.0053213	0.015234	0.676524	379	3	-0.75369	0.074414	0.1034	0.650959	2986	1	2.074
Clstn1	4	0.0053333	0.015234	0.676524	380	2	-0.63588	0.68719	0.66057	0.992422	13078	1	0.41358
Def8	4	0.0053372	0.015234	0.676524	381	2	-1.0054	0.37412	0.42737	0.94913	8685	1	1.3115
Ndp	4	0.0053465	0.015235	0.676524	382	2	-0.55645	0.88559	0.88404	1	17152	0	0
Slc39a5	4	0.0053809	0.015235	0.676524	383	3	-0.48132	0.33759	0.39457	0.925474	8338	1	0.47344
Hus1	4	0.0053882	0.015235	0.676524	384	2	-1.1595	0.21054	0.23319	0.767549	5968	2	0.45608
Olfr1138	4	0.0053915	0.015235	0.676524	385	3	-0.49132	0.97713	0.98095	1	19117	0	0
Lgi1	4	0.0054003	0.015235	0.676524	386	3	-0.39728	0.94778	0.95241	1	18477	0	0
Trpm1	4	0.0054392	0.015235	0.676524	387	2	-0.84969	0.46519	0.4799	0.951241	9780	1	0.32495
Slc6a1	4	0.0054463	0.015235	0.676524	388	3	-0.46083	0.70273	0.68539	0.998699	13373	1	0.25253
Dnaaf5	4	0.0054901	0.015235	0.676524	389	1	-0.32712	0.00099757	0.0047498	0.297357	261	1	0.64532
Fam132b	4	0.0055015	0.015235	0.676524	390	3	-0.56356	0.92717	0.92731	1	18049	0	0
Psat1	4	0.0055921	0.015235	0.676524	391	2	-1.2777	0.95191	0.95678	1	18565	0	0
Snx3	4	0.005643	0.015312	0.676524	392	1	-1.2932	0.91988	0.91915	1	17909	0	0
Tbc1d7	4	0.0056482	0.015312	0.676524	393	3	-0.52871	0.99303	0.99333	1	19482	0	0
Tnrc6a	4	0.005654	0.015312	0.676524	394	2	-0.49855	0.60371	0.56714	0.951241	11687	1	0.27038
Timm8b	4	0.0056721	0.015382	0.676524	395	3	-0.81264	0.89402	0.89035	1	17339	0	0
Gng2	4	0.0056946	0.015456	0.676524	396	3	-0.43859	0.80184	0.80106	1	15431	0	0
Upf2	4	0.0057038	0.015456	0.676524	397	2	-1.731	0.24599	0.29672	0.860276	6743	2	0.65833
4930449I24Rik	4	0.0057174	0.015456	0.676524	398	2	-0.6595	0.66396	0.63772	0.990334	12663	1	0.49313
Ccl19	4	0.0057449	0.015456	0.676524	399	2	-2.7305	0.96833	0.97154	1	18934	0	0
Gm10334	4	0.0057688	0.015456	0.676524	400	3	-1.3888	0.42874	0.45538	0.950867	9326	1	0.51121
Nap1l2	4	0.0057857	0.015456	0.676524	401	2	-0.7483	0.9268	0.92675	1	18039	0	0
Tfip11	4	0.0058132	0.015456	0.676524	402	2	-0.81475	0.27092	0.33176	0.886438	7307	1	1.079
Lcn2	4	0.005882	0.015456	0.676524	403	3	-0.60943	0.9783	0.98177	1	19147	0	0
BC051628	4	0.0058978	0.015456	0.676524	404	3	-0.44574	0.27832	0.34259	0.894476	7482	1	0.39433
Sirt7	4	0.0059004	0.015456	0.676524	405	2	-0.80833	0.84069	0.83146	1	16221	0	0
Tusc5	4	0.0059096	0.015456	0.676524	406	2	-0.5499	0.45179	0.47173	0.951241	9621	1	0.41607
Ptbp1	4	0.0059487	0.015456	0.676524	407	2	-0.57954	0.74694	0.73447	1	14313	0	0
Aptx	4	0.0059997	0.015456	0.676524	408	1	-1.1467	0.86343	0.86472	1	16679	0	0
Pcdhb6	4	0.0060009	0.015456	0.676524	409	3	-0.5642	0.12936	0.15498	0.721856	4166	1	0.62404
Card14	4	0.0060022	0.015456	0.676524	410	2	-0.8597	0.65977	0.63443	0.988026	12585	1	0.28539
Hist1h2ah	3	0.0060142	0.016053	0.676524	411	3	-0.69108	0.99399	0.99461	1	19502	0	0
Galnt3	4	0.0060208	0.015598	0.676524	412	2	-0.83924	0.97658	0.98073	1	19104	0	0
Il1rapl1	4	0.0060348	0.015598	0.676524	413	2	-0.75066	0.18598	0.20882	0.747354	5422	2	0.29641
Helz2	4	0.0060506	0.015739	0.676524	414	2	-0.82052	0.79427	0.79	1	15276	0	0
Gdi2	4	0.0061016	0.015822	0.676524	415	3	-1.3109	0.95761	0.96265	1	18696	0	0
Clptm1l	4	0.0061377	0.015822	0.676524	416	2	-0.74649	0.036515	0.049045	0.542313	1746	2	0.56725
Rps29	3	0.0061477	0.016309	0.676524	417	2	-3.349	0.97908	0.97965	1	19165	0	0
Zfp574	4	0.0061525	0.015822	0.676524	418	1	-2.0234	0.066031	0.096334	0.650959	2802	1	1.7308
Il4	4	0.0061742	0.015822	0.676524	419	3	-0.54071	0.95722	0.96228	1	18684	0	0
Hes2	4	0.0061754	0.015822	0.676524	420	2	-0.65413	0.65177	0.62617	0.988026	12448	1	0.2628
Tap1	4	0.0062035	0.015822	0.676524	421	1	-1.3049	0.87405	0.8726	1	16892	0	0
Acadm	4	0.0062185	0.015822	0.676524	422	3	-0.6759	0.73049	0.71146	1	13971	0	0
Hddc2	4	0.0062224	0.015822	0.676524	423	3	-0.39261	0.45035	0.47173	0.951241	9602	1	0.42875
Adnp2	4	0.0062604	0.015822	0.676524	424	3	-0.47301	0.99048	0.9911	1	19426	0	0
Csnk2b	3	0.0062738	0.016573	0.676524	425	2	-2.369	0.59243	0.57244	0.951241	11518	1	0.50367
Fra10ac1	4	0.0062794	0.015822	0.676524	426	3	-0.51177	0.99109	0.99159	1	19433	0	0
Krt76	4	0.0063053	0.015822	0.676524	427	1	-1.2251	0.090439	0.1176	0.683038	3338	2	0.67001
Vmn1r21	4	0.0063136	0.015822	0.676524	428	3	-0.47594	0.90246	0.89638	1	17510	0	0
Pisd	4	0.0063606	0.015822	0.676524	429	3	-1.6741	0.036814	0.049045	0.542313	1755	1	2.2149
Tmem127	4	0.0063861	0.015822	0.676524	430	3	-0.54875	0.97643	0.98073	1	19101	0	0
Dmrtc2	4	0.0063986	0.015822	0.676524	431	3	-0.55325	0.65912	0.63276	0.988026	12573	1	0.27668
9030624J02Rik	4	0.0064072	0.015981	0.676524	432	1	-1.9206	0.90793	0.9008	1	17630	0	0
Gtf3c1	4	0.0064215	0.015981	0.676524	433	3	-1.5261	0.52435	0.526	0.951241	10531	1	1.0428
Pxk	4	0.006437	0.015982	0.676524	434	3	-0.48744	0.9936	0.99369	1	19494	0	0
Scimp	4	0.0064803	0.01606	0.676524	435	2	-0.93527	0.97993	0.98273	1	19192	0	0
Pafah1b2	4	0.0064852	0.01606	0.676524	436	2	-1.0775	0.99089	0.99159	1	19430	0	0
Cog6	4	0.0064948	0.01606	0.676524	437	2	-0.80602	0.98499	0.98747	1	19313	0	0
Nr1h2	4	0.006509	0.01606	0.676524	438	3	-0.43478	0.76092	0.75443	1	14600	0	0
Emcn	4	0.0065141	0.01606	0.676524	439	2	-0.73436	0.38943	0.43568	0.94913	8853	1	0.4346
Ceacam18	4	0.0065405	0.01606	0.676524	440	3	-0.84335	0.62391	0.58519	0.958106	12010	1	0.27136
Olfr907	4	0.0065535	0.01606	0.676524	441	3	-0.59054	0.98892	0.98988	1	19393	0	0
Eif2ak4	4	0.00656	0.01606	0.676524	442	1	-1.0472	0.6673	0.64264	0.991846	12732	1	0.30596
Rasef	4	0.0065868	0.01606	0.676524	443	2	-0.74493	0.26663	0.32493	0.880145	7214	1	0.55427
Ephx2	4	0.0066166	0.01606	0.676524	444	3	-0.36426	0.52965	0.53097	0.951241	10605	1	0.26706
Dok6	4	0.0066246	0.01606	0.676524	445	3	-0.50639	0.43972	0.4636	0.951241	9466	1	0.45267
Plin5	4	0.0066257	0.01606	0.676524	446	2	-0.80035	0.87369	0.87259	1	16882	0	0
Mcfd2	4	0.0066367	0.01606	0.676524	447	3	-0.50465	0.97828	0.98177	1	19146	0	0
Cbr4	4	0.0066618	0.01606	0.676524	448	2	-0.55205	0.096097	0.1263	0.706918	3458	1	0.84532
Dnttip1	4	0.0066811	0.01606	0.676524	449	3	-0.42534	0.97787	0.98136	1	19133	0	0
Dok1	4	0.0066872	0.01606	0.676524	450	3	-0.61998	0.4956	0.508	0.951241	10147	1	0.29537
Eaf1	4	0.0067137	0.01606	0.676524	451	2	-3.3371	0.59874	0.56223	0.951241	11605	1	0.96834
Mthfd1	4	0.0067137	0.01606	0.676524	452	3	-2.2684	0.89965	0.89487	1	17463	0	0
Sdha	4	0.0067554	0.01606	0.676524	453	2	-1.8385	0.93133	0.93225	1	18130	0	0
Cfap45	4	0.0067726	0.016228	0.676524	454	2	-0.84498	0.63034	0.60155	0.974903	12106	1	0.217
Ccdc40	4	0.0068146	0.016228	0.676524	455	1	-1.1457	0.71747	0.69847	0.998699	13675	1	0.24481
Qrfpr	4	0.0068195	0.016228	0.676524	456	3	-0.44899	0.96404	0.9687	1	18843	0	0
Hcfc2	4	0.0068367	0.016228	0.676524	457	2	-0.94499	0.96134	0.96652	1	18792	0	0
1110004E09Rik	4	0.0068668	0.016316	0.676524	458	3	-1.3441	0.428	0.45538	0.950867	9317	1	0.58334
Man1c1	4	0.0068863	0.016316	0.676524	459	2	-0.63113	0.61087	0.57198	0.951241	11803	1	0.21111
Gli1	4	0.0069164	0.016316	0.676524	460	3	-0.36814	0.6506	0.62617	0.988026	12427	1	0.1983
Isoc2b	4	0.006936	0.0164	0.676524	461	2	-0.66259	0.42337	0.45211	0.950867	9260	1	0.40814
Gm21943	2	0.0069606	0.013906	0.676524	462	2	-2.1964	0.99304	0.99569	1	19483	0	0
Cyp4f13	4	0.0069673	0.0164	0.676524	463	2	-0.69623	0.35367	0.40768	0.938315	8486	1	0.38109
Fxyd3	4	0.0069908	0.016401	0.676524	464	2	-0.73859	0.099177	0.1296	0.706918	3527	1	0.81541
Lrrfip1	4	0.0070182	0.0165	0.676524	465	2	-0.71969	0.92676	0.92675	1	18037	0	0
Pdgfc	4	0.0070509	0.0165	0.676524	466	3	-0.57217	0.92011	0.91975	1	17915	0	0
Tmem150c	4	0.0070961	0.016583	0.676524	467	2	-0.79522	0.28801	0.35655	0.897147	7706	2	0.31955
Slc51a	4	0.0071019	0.016583	0.676524	468	3	-0.51106	0.9677	0.971	1	18920	0	0
Rps2	3	0.0071063	0.017495	0.690654	469	3	-1.3738	0.99289	0.99373	1	19477	0	0
Pogz	4	0.0071145	0.016583	0.676524	470	3	-0.46347	0.3616	0.41594	0.946122	8573	1	0.38911
Htr3b	4	0.00712	0.016583	0.676524	471	2	-0.6084	0.48048	0.48989	0.951241	9960	1	0.44432
Gm7325	4	0.0071282	0.016583	0.676524	472	3	-0.48104	0.99232	0.99264	1	19464	0	0
Lrrcc1	4	0.0071364	0.016583	0.676524	473	2	-0.56387	0.48777	0.49318	0.951241	10041	1	0.33052
Smpx	4	0.0071617	0.016584	0.676524	474	2	-0.56268	0.51065	0.51459	0.951241	10348	1	0.31942
Myh4	4	0.0071709	0.016584	0.676524	475	1	-0.81946	0.5852	0.55733	0.951241	11405	1	0.22223
Fam81a	4	0.0072192	0.016662	0.676524	476	3	-0.51686	0.12335	0.15322	0.721856	4038	1	0.66607
Evi2a	4	0.0072218	0.016662	0.676524	477	2	-0.52148	0.15468	0.18317	0.745835	4735	1	0.7784
Ccl21b	4	0.0072479	0.016662	0.676524	478	2	-2.6008	0.57232	0.55733	0.951241	11213	1	0.46747
Sirt2	4	0.0072727	0.016849	0.676524	479	1	-1.1673	0.10461	0.13344	0.706918	3636	2	0.60268
Adgrg7	4	0.0072992	0.016849	0.676524	480	3	-0.57228	0.64327	0.61796	0.984936	12318	1	0.20823
Adcy1	4	0.0073236	0.016926	0.676524	481	1	-0.88231	0.04722	0.065036	0.579085	2124	1	0.94614
Nr2f6	4	0.0073524	0.016926	0.676524	482	2	-0.86222	0.88769	0.88644	1	17203	0	0
Ankrd37	4	0.0073745	0.017012	0.676524	483	2	-0.65878	0.40164	0.44231	0.94913	8989	1	0.44888
Ahr	3	0.0073909	0.017865	0.698256	484	2	-0.59151	0.23762	0.26249	0.81155	6549	1	0.48793
Ankrd44	4	0.0074154	0.017102	0.676524	485	3	-0.39707	0.94951	0.95524	1	18511	0	0
Szrd1	4	0.0074254	0.017102	0.676524	486	2	-0.98001	0.43657	0.45865	0.951241	9420	1	0.37606
Atp2c1	4	0.0074522	0.017102	0.676524	487	3	-0.43514	0.57059	0.554	0.951241	11184	1	0.28808
Nup210l	4	0.0074763	0.017102	0.676524	488	2	-0.61664	0.97482	0.979	1	19066	0	0
Tpo	4	0.0074783	0.017102	0.676524	489	2	-0.95922	0.076199	0.10406	0.650959	3023	1	1.185
Gm8677	4	0.0074826	0.017102	0.676524	490	3	-1.4737	0.39436	0.43897	0.94913	8907	1	0.52966
Ubxn10	4	0.0075093	0.017102	0.676524	491	3	-0.52194	0.83448	0.82824	1	16099	0	0
Gm13023	4	0.0075145	0.017102	0.676524	492	2	-0.63102	0.8788	0.87429	1	17002	0	0
Raver2	4	0.0075174	0.017102	0.676524	493	3	-0.48838	0.97071	0.97321	1	18985	0	0
Cecr6	4	0.0075272	0.017102	0.676524	494	2	-0.51678	0.69069	0.66719	0.995374	13146	1	0.25184
Zfp91	4	0.0075426	0.017102	0.676524	495	3	-0.51396	0.53791	0.53583	0.951241	10715	1	0.4298
Zfp9	4	0.0076204	0.017574	0.69102	496	3	-0.49156	0.96736	0.97043	1	18911	0	0
Angptl4	4	0.007629	0.017574	0.69102	497	1	-1.3452	0.40157	0.44231	0.94913	8988	1	0.35628
Polr1a	4	0.0076435	0.017666	0.693237	498	3	-1.6429	0.64651	0.62123	0.985661	12363	1	0.87762
Mup2	1	0.0076445	0.0080741	0.676524	499	1	-0.8076	0.99236	0.99193	1	19465	0	0
Kng1	4	0.0076645	0.01778	0.696314	500	3	-0.45744	0.90154	0.89638	1	17494	0	0
Frmpd4	4	0.0076808	0.021474	0.758534	501	3	-0.53475	0.9269	0.92675	1	18044	0	0
Ccdc79	4	0.007707	0.021474	0.758534	502	2	-0.51562	0.17443	0.2047	0.747354	5159	2	0.31106
Zbtb14	4	0.0077307	0.021474	0.758534	503	3	-0.68259	0.24862	0.30099	0.866384	6794	1	0.53833
Rai1	4	0.0077354	0.021474	0.758534	504	3	-0.52602	0.99543	0.99571	1	19528	0	0
Kif17	4	0.0077521	0.021474	0.758534	505	3	-0.52812	0.90378	0.89788	1	17534	0	0
Vmn1r117	3	0.0077523	0.018366	0.716417	506	1	-4.8937	0.067869	0.078762	0.627669	2842	2	0.70152
Gulo	4	0.0077816	0.021475	0.758534	507	1	-1.3506	0.54625	0.5408	0.951241	10847	1	0.27595
Tbc1d1	4	0.00781	0.021475	0.758534	508	3	-0.40684	0.93955	0.94279	1	18296	0	0
Cldn23	4	0.0078325	0.021475	0.758534	509	1	-0.64874	0.74526	0.72987	1	14276	0	0
Sema7a	4	0.007847	0.021475	0.758534	510	3	-0.51023	0.98141	0.98417	1	19227	0	0
Olfr569	4	0.00787	0.021581	0.758534	511	2	-1.0988	0.63625	0.6098	0.981953	12210	1	0.20543
Vps36	3	0.007905	0.021421	0.758534	512	2	-0.89386	0.95575	0.9616	1	18652	0	0
Fam188a	4	0.0079342	0.021975	0.758534	513	2	-0.67747	0.79843	0.79613	1	15359	0	0
Ccdc93	4	0.0079654	0.021975	0.758534	514	3	-1.1327	0.42591	0.45538	0.950867	9291	1	0.39336
Erc2	4	0.0079851	0.022086	0.758534	515	3	-0.65058	0.30464	0.37169	0.901147	8019	1	0.43386
Gm10220	2	0.0080058	0.016514	0.676524	516	1	-3.6413	0.81146	0.82276	1	15636	0	0
4931423N10Rik	4	0.0080134	0.022086	0.758534	517	2	-0.69296	0.69564	0.67389	0.998699	13237	1	0.26159
Rnf166	4	0.0080187	0.022086	0.758534	518	2	-0.58969	0.76452	0.75721	1	14671	0	0
Mettl7a3	4	0.008036	0.022086	0.758534	519	2	-0.59798	0.12594	0.15408	0.721856	4090	1	0.65968
Il21	4	0.0080868	0.022087	0.758534	520	3	-0.59272	0.7806	0.77861	1	14990	0	0
Hist1h2bh	3	0.0081045	0.021615	0.758534	521	3	-1.024	0.9919	0.99276	1	19452	0	0
Rpusd2	4	0.008115	0.022087	0.758534	522	3	-0.45894	0.3887	0.43568	0.94913	8846	1	0.4193
Ap1s1	4	0.0081304	0.022087	0.758534	523	3	-1.1936	0.74019	0.72531	1	14183	0	0
Sema4a	4	0.0081364	0.022087	0.758534	524	2	-1.057	0.9793	0.98215	1	19174	0	0
Olfr937	4	0.0081377	0.022087	0.758534	525	2	-0.71735	0.76032	0.75443	1	14589	0	0
Fam71f1	4	0.0081418	0.022087	0.758534	526	3	-0.51607	0.72514	0.70823	0.998699	13851	0	0
4933434E20Rik	4	0.0081525	0.022087	0.758534	527	3	-0.53783	0.97314	0.97717	1	19035	0	0
Ankrd7	4	0.0081603	0.022087	0.758534	528	3	-0.43657	0.9655	0.96986	1	18869	0	0
Prr11	3	0.0081635	0.021716	0.758534	529	3	-0.54494	0.99184	0.99265	1	19448	0	0
Cyc1	4	0.008226	0.022195	0.758534	530	3	-1.8958	0.72304	0.70336	0.998699	13808	0	0
Gpr182	4	0.0082712	0.022308	0.758534	531	2	-0.68525	0.94764	0.95199	1	18474	0	0
Dpy19l4	4	0.0082874	0.022308	0.758534	532	2	-0.60782	0.95178	0.95678	1	18562	0	0
Cyp7a1	4	0.0083254	0.022308	0.758534	533	2	-0.50903	0.99227	0.99264	1	19461	0	0
Gucy2e	4	0.0083417	0.022308	0.758534	534	2	-0.6051	0.17554	0.2047	0.747354	5189	2	0.38932
Vmn2r9	4	0.0083852	0.022501	0.758534	535	3	-0.48531	0.91395	0.90834	1	17773	0	0
Trappc4	4	0.0084133	0.022501	0.758534	536	3	-1.5605	0.79849	0.79613	1	15360	0	0
Icosl	4	0.0084321	0.022501	0.758534	537	3	-0.50533	0.34477	0.3995	0.926534	8402	1	0.45748
Ces5a	4	0.0084397	0.022501	0.758534	538	2	-0.6223	0.44884	0.47173	0.951241	9583	1	0.32056
Irs4	4	0.0084428	0.022501	0.758534	539	1	-0.82278	0.39059	0.43568	0.94913	8866	1	0.32295
Amd2	4	0.0084532	0.022501	0.758534	540	3	-0.69389	0.95354	0.95982	1	18607	0	0
Ssr3	4	0.0084937	0.022501	0.758534	541	2	-0.67602	0.76494	0.75721	1	14678	0	0
Defa-rs7	3	0.0085444	0.022307	0.758534	542	3	-1.5133	0.98421	0.98442	1	19300	0	0
Ankhd1	4	0.0085445	0.022502	0.758534	543	1	-0.97155	0.60629	0.56873	0.951241	11730	1	0.24954
Ttc37	4	0.0085559	0.022502	0.758534	544	3	-0.78991	0.68928	0.66222	0.993912	13114	1	0.33107
Atf3	4	0.0085954	0.022502	0.758534	545	2	-0.8001	0.79949	0.79859	1	15379	0	0
Ebna1bp2	4	0.0086308	0.022502	0.758534	546	3	-1.341	0.63002	0.60155	0.974903	12104	1	0.3833
Mstn	4	0.0086462	0.022502	0.758534	547	1	-0.81235	0.19019	0.21506	0.747354	5518	2	0.30565
Rhox3f	4	0.0086474	0.022502	0.758534	548	3	-1.6231	0.97416	0.97856	1	19051	0	0
Pde6c	4	0.0086833	0.022502	0.758534	549	3	-0.41961	0.6332	0.60484	0.978755	12156	1	0.28505
Sap30bp	4	0.0087094	0.022609	0.758534	550	2	-1.4283	0.61175	0.57198	0.951241	11815	1	0.368
Cxcr5	4	0.0087479	0.02261	0.758534	551	3	-0.50636	0.30717	0.37169	0.901147	8046	1	0.49997
Tacr2	4	0.0087705	0.02261	0.758534	552	2	-0.72529	0.040056	0.054546	0.562634	1873	2	0.4597
Xlr5a	4	0.0087793	0.02261	0.758534	553	3	-0.92479	0.33125	0.38642	0.912114	8281	1	0.58921
Defb11	4	0.0088324	0.022721	0.758534	554	3	-0.51143	0.53762	0.53583	0.951241	10710	1	0.27427
Txnrd2	4	0.0088374	0.022721	0.758534	555	2	-0.66929	0.61429	0.57868	0.951241	11851	1	0.25744
Brinp3	4	0.0088496	0.022722	0.758534	556	1	-0.93829	0.9173	0.91421	1	17850	0	0
Ssh2	4	0.0088877	0.02282	0.758534	557	2	-0.51876	0.51711	0.51782	0.951241	10429	1	0.28914
Cipc	4	0.0089004	0.02282	0.758534	558	3	-0.41398	0.96437	0.9687	1	18852	0	0
Tbc1d24	4	0.0089513	0.02282	0.758534	559	1	-1.4641	0.84878	0.84271	1	16365	0	0
Rwdd2b	4	0.0089672	0.02282	0.758534	560	3	-0.36521	0.10249	0.13112	0.706918	3594	1	0.88511
Atxn7l2	4	0.0090021	0.02282	0.758534	561	1	-0.91452	0.40791	0.44559	0.94913	9068	1	0.39453
Synpr	4	0.0090174	0.02282	0.758534	562	3	-0.36421	0.97774	0.98136	1	19129	0	0
Dnm1	4	0.0090198	0.022821	0.758534	563	3	-0.38211	0.54851	0.54242	0.951241	10874	1	0.30267
Olfr266	4	0.009048	0.022821	0.758534	564	3	-0.76203	0.96752	0.97073	1	18913	0	0
Sharpin	4	0.0090529	0.022821	0.758534	565	2	-0.74466	0.22908	0.26384	0.814163	6354	2	0.22794
Zmynd10	4	0.0090734	0.022821	0.758534	566	2	-0.68061	0.57422	0.55733	0.951241	11240	1	0.4041
Parm1	4	0.0091187	0.022821	0.758534	567	2	-0.54434	0.66279	0.63605	0.989773	12639	1	0.2015
Wnt7b	4	0.0091414	0.022821	0.758534	568	2	-0.85762	0.13484	0.1666	0.745835	4285	1	0.63962
Prss29	4	0.0091466	0.022821	0.758534	569	3	-0.506	0.89677	0.89261	1	17403	0	0
Rnh1	4	0.0091546	0.022821	0.758534	570	2	-0.4524	0.19042	0.21506	0.747354	5526	1	0.64998
Luzp4	4	0.0091553	0.022821	0.758534	571	3	-1.1785	0.98535	0.98777	1	19320	0	0
Zfp317	3	0.0091644	0.025943	0.779994	572	1	-1.1181	0.76965	0.7697	1	14778	0	0
Mdfic	4	0.0091949	0.023027	0.758534	573	3	-0.5813	0.37646	0.42903	0.94913	8714	1	0.4056
Lrrc6	4	0.0092054	0.023027	0.758534	574	2	-0.7984	0.86731	0.86739	1	16758	0	0
Ppapdc2	4	0.009238	0.023028	0.758534	575	3	-0.53469	0.98611	0.98823	1	19336	0	0
Ift57	4	0.0092945	0.023158	0.758534	576	3	-0.41114	0.97449	0.97877	1	19058	0	0
Hmha1	4	0.009307	0.023158	0.758534	577	3	-0.5873	0.49403	0.5047	0.951241	10131	1	0.45628
Smarcc2	4	0.0093579	0.023364	0.758534	578	2	-0.64476	0.8481	0.84271	1	16358	0	0
Adsl	4	0.0093797	0.023365	0.758534	579	3	-1.6275	0.37911	0.43072	0.94913	8739	1	1.326
Mov10	4	0.0094087	0.023365	0.758534	580	1	-1.0445	0.4827	0.48989	0.951241	9979	1	0.33206
Vwa2	4	0.0094338	0.023621	0.758534	581	3	-0.51786	0.65652	0.63111	0.988026	12530	1	0.20498
Fam169a	4	0.0094559	0.023621	0.758534	582	3	-0.54742	0.97949	0.98215	1	19180	0	0
Eml3	4	0.0095097	0.023621	0.758534	583	3	-0.45893	0.91099	0.90362	1	17712	0	0
Apol11a	4	0.0095611	0.023621	0.758534	584	2	-2.8695	0.56893	0.55238	0.951241	11167	1	0.5128
Adipor1	4	0.009577	0.023621	0.758534	585	3	-0.64886	0.6271	0.59342	0.967226	12064	1	0.3383
Olfr1337	4	0.0096119	0.023736	0.758534	586	1	-0.99237	0.11015	0.13983	0.713923	3749	2	0.63243
Zkscan4	4	0.0096254	0.023736	0.758534	587	3	-0.45086	0.8476	0.84171	1	16345	0	0
3110002H16Rik	4	0.0096412	0.023737	0.758534	588	3	-0.60612	0.30319	0.37169	0.901147	8001	1	0.56603
Cited2	4	0.0096627	0.023737	0.758534	589	3	-0.67557	0.95352	0.95982	1	18605	0	0
Gm15319	3	0.0096984	0.026359	0.779994	590	1	-4.7309	0.81125	0.80616	1	15626	0	0
Cd209a	4	0.0097135	0.023872	0.758534	591	2	-0.57353	0.81862	0.81623	1	15793	0	0
Arhgap4	4	0.009755	0.023872	0.758534	592	3	-0.5598	0.14097	0.17361	0.745835	4417	1	0.62121
Efcab2	4	0.0097643	0.023872	0.758534	593	2	-0.61044	0.58575	0.55733	0.951241	11410	1	0.28245
Olfr1140	4	0.0097666	0.023872	0.758534	594	3	-0.49729	0.2586	0.31454	0.872746	7018	1	0.57587
Gmnc	4	0.0097692	0.023872	0.758534	595	3	-0.49776	0.98429	0.98701	1	19301	0	0
Myoc	4	0.0097813	0.023872	0.758534	596	3	-0.61265	0.99449	0.99463	1	19508	0	0
Tbkbp1	3	0.0098128	0.026761	0.779994	597	2	-0.58408	0.91623	0.92558	1	17823	0	0
Tmem27	4	0.0098151	0.023873	0.758534	598	1	-0.9131	0.65521	0.63111	0.988026	12506	1	0.21245
Paip1	4	0.009826	0.023873	0.758534	599	3	-0.46026	0.97692	0.98073	1	19114	0	0
Fiz1	4	0.0098519	0.023873	0.758534	600	3	-0.55907	0.70842	0.69031	0.998699	13499	1	0.29266
Iah1	4	0.0098908	0.023873	0.758534	601	3	-0.42131	0.86158	0.86201	1	16637	0	0
Zxdb	4	0.0098987	0.023873	0.758534	602	3	-0.55329	0.89632	0.89261	1	17392	0	0
Trmt6	3	0.0099048	0.027312	0.779994	603	2	-1.9387	0.06575	0.073549	0.601507	2794	1	1.9873
Nap1l4	4	0.0099167	0.023873	0.758534	604	1	-1.4645	0.89006	0.88723	1	17252	0	0
Farp2	4	0.0099341	0.023873	0.758534	605	2	-0.55529	0.17391	0.2047	0.747354	5145	2	0.41078
Nxph4	4	0.0099403	0.023873	0.758534	606	3	-0.49144	0.96326	0.9687	1	18828	0	0
St6galnac1	4	0.0099459	0.023873	0.758534	607	2	-0.54545	0.70332	0.68707	0.998699	13390	1	0.17209
Tpk1	4	0.0099675	0.023995	0.758534	608	3	-0.52956	0.78202	0.77987	1	15024	0	0
Ppm1j	4	0.010018	0.024185	0.758534	609	1	-1.3621	0.23152	0.26947	0.821998	6415	2	0.33631
Spdef	4	0.010037	0.024186	0.758534	610	3	-0.51985	0.86533	0.86739	1	16723	0	0
Gapvd1	4	0.010069	0.024307	0.758534	611	1	-0.85953	0.17018	0.20025	0.747354	5054	1	0.59484
Slc38a4	4	0.010079	0.024307	0.758534	612	3	-0.5109	0.76307	0.7558	1	14646	0	0
Gtf2h4	3	0.010083	0.027734	0.779994	613	2	-1.238	0.18552	0.22786	0.757184	5404	1	1.0036
Hn1	4	0.01012	0.024307	0.758534	614	2	-0.76044	0.61044	0.57198	0.951241	11795	1	0.22829
Arsk	4	0.010121	0.024307	0.758534	615	3	-0.54321	0.94894	0.95486	1	18497	0	0
Gtf2h2	4	0.010124	0.024307	0.758534	616	2	-1.8287	0.12128	0.15322	0.721856	3996	1	1.8435
Fgf20	4	0.010171	0.024307	0.758534	617	1	-0.84465	0.14848	0.17925	0.745835	4592	2	0.37678
Sel1l3	4	0.010189	0.024307	0.758534	618	2	-0.65814	0.68534	0.65893	0.992077	13041	1	0.19102
Baiap2l2	4	0.010207	0.024307	0.758534	619	3	-0.6811	0.65738	0.63276	0.988026	12545	1	0.27342
Sec24a	4	0.010214	0.024307	0.758534	620	3	-0.44256	0.77753	0.77473	1	14923	0	0
H2-Q7	4	0.010221	0.024307	0.758534	621	1	-1.8639	0.045996	0.062502	0.579085	2078	3	0.71924
Rsrc1	4	0.010254	0.024307	0.758534	622	3	-0.62528	0.22952	0.26623	0.817816	6367	1	0.62836
Btbd10	4	0.010272	0.024307	0.758534	623	2	-0.69361	0.80245	0.80344	1	15436	0	0
U2af1	2	0.010273	0.021904	0.758534	624	1	-3.4944	0.80128	0.81513	1	15421	0	0
Pdlim2	4	0.010339	0.024307	0.758534	625	2	-0.50546	0.90845	0.90148	1	17645	0	0
Asap2	4	0.010355	0.024307	0.758534	626	3	-0.54035	0.46474	0.47665	0.951241	9772	1	0.33573
E130308A19Rik	4	0.010358	0.024307	0.758534	627	3	-0.4394	0.93666	0.93837	1	18248	0	0
Gm5617	4	0.010374	0.024307	0.758534	628	2	-0.61817	0.62698	0.59342	0.967226	12059	1	0.2521
Ifnz	4	0.010379	0.024307	0.758534	629	3	-0.63014	0.98228	0.98452	1	19247	0	0
Fbxl4	4	0.010381	0.024307	0.758534	630	2	-0.59331	0.58193	0.55733	0.951241	11359	1	0.24614
Tmem254b	4	0.010429	0.027933	0.779994	631	2	-1.0361	0.63983	0.61633	0.984936	12265	1	0.26997
Sf3a1	3	0.010456	0.027861	0.779994	632	3	-1.2529	0.98954	0.98995	1	19408	0	0
Zfp422	4	0.010531	0.027934	0.779994	633	3	-0.57569	0.97309	0.97694	1	19032	0	0
Mrm1	4	0.010577	0.028303	0.779994	634	2	-0.60072	0.1651	0.19065	0.747354	4943	1	0.6138
Mbnl1	4	0.010581	0.028303	0.779994	635	3	-0.53991	0.99199	0.99245	1	19455	0	0
Pold2	4	0.01064	0.02853	0.779994	636	3	-1.6779	0.99253	0.99274	1	19470	0	0
Ppp6r1	4	0.010678	0.028531	0.779994	637	2	-0.60049	0.58305	0.55733	0.951241	11374	1	0.24954
Tmem229a	4	0.010678	0.028531	0.779994	638	1	-1.0427	0.032099	0.0394	0.480527	1590	2	0.81917
Micall2	4	0.010721	0.028679	0.779994	639	2	-0.52734	0.99265	0.99284	1	19473	0	0
Sufu	4	0.010729	0.028679	0.779994	640	1	-1.3482	0.70255	0.68377	0.998699	13368	1	0.23006
Gm13277	4	0.010733	0.028679	0.779994	641	3	-0.90414	0.70102	0.68377	0.998699	13339	1	0.30865
Umodl1	4	0.010734	0.028679	0.779994	642	3	-0.52017	0.81681	0.81509	1	15755	0	0
Dmrtc1a	4	0.01078	0.028679	0.779994	643	2	-0.50658	0.7077	0.6895	0.998699	13484	1	0.16995
Foxp2	4	0.010831	0.028911	0.779994	644	2	-0.50334	0.89036	0.88723	1	17259	0	0
Vmn1r23	4	0.010831	0.028911	0.779994	645	2	-0.61676	0.21632	0.24324	0.784074	6085	2	0.60324
Smc1a	3	0.010844	0.031089	0.779994	646	3	-1.1757	0.98916	0.98936	1	19402	0	0
Gm14345	4	0.010865	0.028911	0.779994	647	3	-2.1424	0.73604	0.71923	1	14086	0	0
D430041D05Rik	4	0.010905	0.028911	0.779994	648	3	-0.5656	0.95641	0.9616	1	18669	0	0
Pi4kb	4	0.010932	0.028911	0.779994	649	2	-2.7609	0.48689	0.49318	0.951241	10031	1	0.47509
Sema4d	4	0.010955	0.028911	0.779994	650	3	-0.47563	0.89794	0.89338	1	17431	0	0
Btbd6	4	0.010966	0.028911	0.779994	651	3	-0.38416	0.97906	0.98215	1	19164	0	0
Camkv	4	0.010971	0.028911	0.779994	652	3	-0.46313	0.73238	0.7146	1	14010	0	0
Blvra	4	0.011007	0.028911	0.779994	653	3	-0.44682	0.85862	0.85926	1	16568	0	0
Tnfaip2	4	0.01101	0.028911	0.779994	654	2	-0.50441	0.87005	0.87004	1	16816	0	0
Sis	4	0.011023	0.028912	0.779994	655	2	-0.82576	0.49667	0.51131	0.951241	10161	1	0.42675
Tmem173	4	0.011034	0.028912	0.779994	656	2	-0.54886	0.15952	0.18539	0.745835	4832	1	0.85648
Tpcn1	4	0.01106	0.028912	0.779994	657	3	-0.44538	0.99381	0.99387	1	19499	0	0
Hist2h2ac	2	0.011087	0.022386	0.758534	658	1	-1.489	0.24278	0.22949	0.759558	6660	1	0.57815
Olfr461	4	0.011103	0.028912	0.779994	659	3	-0.64987	0.88034	0.87591	1	17033	0	0
Commd8	4	0.011135	0.028912	0.779994	660	1	-1.4148	0.61165	0.57198	0.951241	11814	1	0.49465
Bex1	4	0.011154	0.028912	0.779994	661	3	-0.45469	0.74233	0.72684	1	14217	0	0
Lrfn4	4	0.011159	0.028912	0.779994	662	3	-0.49768	0.98991	0.99098	1	19413	0	0
Dcun1d2	4	0.011165	0.028912	0.779994	663	3	-0.53508	0.83515	0.82935	1	16110	0	0
Il1rl2	4	0.011172	0.028912	0.779994	664	2	-1.8436	0.73278	0.7146	1	14015	0	0
Vmn1r137	4	0.011186	0.028912	0.779994	665	1	-1.9262	0.014377	0.022861	0.44235	973	3	0.52915
Tdg	4	0.011237	0.029154	0.779994	666	2	-0.74079	0.26476	0.32007	0.872746	7171	1	0.44199
Mmp12	4	0.011292	0.029154	0.779994	667	3	-0.38604	0.27104	0.33176	0.886438	7310	1	0.5335
Hnrnpk	4	0.011341	0.0293	0.779994	668	2	-1.8386	0.6361	0.6098	0.981953	12206	1	0.34992
C1qtnf1	4	0.011389	0.0293	0.779994	669	2	-0.66048	0.91825	0.91484	1	17872	0	0
4930415F15Rik	4	0.011403	0.0293	0.779994	670	3	-0.50609	0.9275	0.92785	1	18055	0	0
Thap7	4	0.011418	0.029301	0.779994	671	3	-0.73517	0.91153	0.9043	1	17724	0	0
Dock9	4	0.01144	0.029301	0.779994	672	2	-0.68009	0.39478	0.43897	0.94913	8914	1	0.40216
Timp2	4	0.01149	0.029301	0.779994	673	2	-0.46228	0.80785	0.80697	1	15554	0	0
Cyp2c29	4	0.011599	0.029455	0.779994	674	3	-0.55732	0.97781	0.98136	1	19132	0	0
Lair1	4	0.011643	0.029455	0.779994	675	2	-0.68763	0.49419	0.5047	0.951241	10134	1	0.4492
Sugct	4	0.011676	0.029456	0.779994	676	2	-0.73398	0.45841	0.47334	0.951241	9700	1	0.35701
Mup3	4	0.011693	0.029456	0.779994	677	3	-0.51376	0.21622	0.24324	0.784074	6081	1	0.55781
Sprr1a	4	0.011708	0.029456	0.779994	678	3	-0.52293	0.98903	0.98988	1	19398	0	0
2700097O09Rik	4	0.011737	0.029456	0.779994	679	3	-0.47992	0.72747	0.70823	0.998699	13903	0	0
Greb1	4	0.01175	0.029456	0.779994	680	3	-0.39169	0.35739	0.41594	0.946122	8520	1	0.3981
Tgfbr2	4	0.011752	0.029456	0.779994	681	3	-0.55339	0.9365	0.93837	1	18246	0	0
F830016B08Rik	4	0.011768	0.029456	0.779994	682	3	-0.42898	0.5917	0.56062	0.951241	11506	1	0.45795
Hey1	4	0.011795	0.029456	0.779994	683	2	-0.62789	0.46532	0.4799	0.951241	9782	1	0.37614
Olfr57	4	0.011816	0.029714	0.779994	684	3	-0.41216	0.91794	0.91421	1	17865	0	0
Akap10	4	0.011848	0.029714	0.779994	685	3	-0.6122	0.85695	0.85639	1	16534	0	0
Myo10	4	0.011867	0.029714	0.779994	686	2	-0.52238	0.66498	0.63937	0.991846	12683	1	0.25132
Gdpd3	4	0.011874	0.029714	0.779994	687	2	-0.88038	0.24224	0.28919	0.848567	6652	1	0.53849
Ap1g2	4	0.011896	0.029714	0.779994	688	1	-0.75221	0.73304	0.71611	1	14020	0	0
4933417A18Rik	4	0.011906	0.029714	0.779994	689	2	-0.76094	0.87927	0.87429	1	17010	0	0
Tbc1d10c	4	0.011912	0.029714	0.779994	690	2	-0.57518	0.28503	0.35091	0.896426	7645	1	0.46733
Otub2	4	0.011964	0.029715	0.779994	691	2	-2.5425	0.75146	0.74454	1	14411	0	0
Ids	4	0.011973	0.029715	0.779994	692	3	-0.371	0.9791	0.98215	1	19166	0	0
Pmpca	4	0.011998	0.029715	0.779994	693	1	-3.8102	0.039752	0.054546	0.562634	1851	3	1.1941
Lrp2	4	0.012048	0.029985	0.779994	694	1	-1.0806	0.79241	0.7875	1	15240	0	0
Bcl2l12	4	0.012065	0.029985	0.779994	695	3	-0.45829	0.33928	0.39618	0.926534	8352	1	0.55894
Impdh2	4	0.012079	0.029985	0.779994	696	3	-1.6938	0.96999	0.97321	1	18970	0	0
En1	4	0.012099	0.029985	0.779994	697	2	-0.77929	0.69145	0.66719	0.995374	13160	1	0.2855
Hist1h2bb	4	0.012161	0.033589	0.779994	698	3	-2.053	0.97306	0.97694	1	19029	0	0
Ube2d2b	4	0.012168	0.033589	0.779994	699	3	-0.4084	0.98342	0.98571	1	19279	0	0
Asph	4	0.012242	0.033589	0.779994	700	3	-0.37622	0.96696	0.97043	1	18906	0	0
Tnfrsf22	4	0.012251	0.033589	0.779994	701	3	-0.54266	0.92847	0.93011	1	18073	0	0
Olfr1076	4	0.012257	0.033589	0.779994	702	3	-0.39529	0.8465	0.8397	1	16317	0	0
Enc1	4	0.012287	0.033589	0.779994	703	3	-0.44601	0.98728	0.9888	1	19362	0	0
Tmem62	4	0.012302	0.033589	0.779994	704	1	-1.3392	0.89577	0.89261	1	17382	0	0
Trim11	4	0.012326	0.033589	0.779994	705	2	-0.59161	0.44438	0.4685	0.951241	9527	1	0.43687
Pappa2	4	0.012332	0.033589	0.779994	706	3	-0.33576	0.96872	0.9721	1	18942	0	0
S100a16	4	0.01235	0.033589	0.779994	707	3	-0.41461	0.94742	0.95199	1	18468	0	0
Ebf3	4	0.012377	0.033589	0.779994	708	3	-0.59218	0.77142	0.76406	1	14822	0	0
Cage1	4	0.012403	0.033734	0.779994	709	1	-0.88062	0.21391	0.23979	0.779233	6034	2	0.30738
Mtmr1	4	0.012408	0.033734	0.779994	710	3	-0.47443	0.97703	0.98095	1	19116	0	0
Ern2	4	0.012438	0.033734	0.779994	711	3	-0.56257	0.77946	0.77734	1	14967	0	0
Mxd4	4	0.012464	0.033734	0.779994	712	2	-0.48213	0.7606	0.75443	1	14593	0	0
Zdhhc8	4	0.012477	0.033734	0.779994	713	2	-0.74239	0.88298	0.88167	1	17093	0	0
Tmem119	4	0.012515	0.033734	0.779994	714	3	-0.48178	0.7127	0.6968	0.998699	13577	1	0.17953
Tshz2	4	0.012555	0.033734	0.779994	715	2	-0.59139	0.95005	0.95564	1	18522	0	0
Tacr1	4	0.012569	0.033734	0.779994	716	2	-0.65788	0.75603	0.75307	1	14511	0	0
Mbtps1	3	0.012594	0.033468	0.779994	717	2	-2.652	0.26793	0.28894	0.848567	7238	1	1.1409
Fdx1	4	0.012595	0.033734	0.779994	718	2	-0.80299	0.68519	0.65893	0.992077	13038	1	0.22241
Dlx2	4	0.012609	0.033734	0.779994	719	3	-0.38072	0.80001	0.79859	1	15393	0	0
Cdpf1	4	0.012615	0.033734	0.779994	720	3	-0.38155	0.85278	0.85159	1	16453	0	0
Akr1c13	4	0.012626	0.033734	0.779994	721	3	-0.55688	0.79989	0.79859	1	15389	0	0
Olfr491	4	0.012649	0.033734	0.779994	722	3	-0.37306	0.5682	0.55238	0.951241	11155	1	0.33263
Fndc5	4	0.012657	0.033734	0.779994	723	2	-0.37305	0.9558	0.9616	1	18655	0	0
Olfr476	4	0.012673	0.033734	0.779994	724	3	-0.39004	0.1363	0.17079	0.745835	4313	1	0.67013
Crp	4	0.012681	0.033734	0.779994	725	2	-0.6091	0.063257	0.094615	0.650959	2735	2	0.60433
Epyc	4	0.012748	0.033734	0.779994	726	3	-0.45583	0.91751	0.91421	1	17854	0	0
Irf3	4	0.012758	0.033734	0.779994	727	2	-0.63411	0.22754	0.26192	0.810039	6321	1	0.47584
Fbxo16	4	0.012803	0.03387	0.779994	728	3	-0.41653	0.78736	0.78249	1	15145	0	0
Zbtb37	4	0.012809	0.03387	0.779994	729	1	-1.0817	0.33721	0.39457	0.925474	8333	1	0.41731
Catip	4	0.012827	0.03387	0.779994	730	2	-0.68849	0.64927	0.62288	0.987725	12406	1	0.24215
Swi5	4	0.01286	0.03387	0.779994	731	1	-1.4138	0.54248	0.53753	0.951241	10797	1	0.37164
Atp2a3	4	0.012862	0.03387	0.779994	732	3	-0.47989	0.90525	0.89861	1	17566	0	0
Smtnl1	4	0.012878	0.03387	0.779994	733	3	-0.45142	0.51167	0.51459	0.951241	10362	1	0.34084
Wfdc17	4	0.012887	0.03387	0.779994	734	3	-0.40017	0.96649	0.97014	1	18897	0	0
Scn8a	4	0.012894	0.03387	0.779994	735	2	-0.60934	0.92349	0.9239	1	17981	0	0
Ldb1	3	0.012903	0.03379	0.779994	736	2	-2.2478	0.29633	0.31896	0.872746	7894	1	1.3115
Nrg2	4	0.012961	0.034126	0.779994	737	2	-0.73638	0.50593	0.51296	0.951241	10282	1	0.33474
Tbc1d13	4	0.012987	0.034126	0.779994	738	2	-0.99641	0.81299	0.8128	1	15672	0	0
Gas2l2	4	0.013012	0.034126	0.779994	739	1	-1.225	0.89256	0.88879	1	17306	0	0
Zfp14	4	0.013141	0.034404	0.779994	740	3	-0.48916	0.99522	0.99538	1	19522	0	0
Pfkl	4	0.013164	0.034404	0.779994	741	1	-1.0097	0.15559	0.18317	0.745835	4757	2	0.28574
Tsku	4	0.013209	0.034404	0.779994	742	3	-0.41279	0.24808	0.30099	0.866384	6785	1	0.45553
Car5b	4	0.013214	0.034404	0.779994	743	2	-0.56216	0.8302	0.82178	1	16026	0	0
Rtkn	4	0.01325	0.034559	0.779994	744	3	-0.37871	0.9779	0.98136	1	19134	0	0
Taf4b	4	0.013265	0.034559	0.779994	745	2	-0.70646	0.57062	0.554	0.951241	11185	1	0.27742
Il17rd	4	0.013275	0.034559	0.779994	746	3	-0.35281	0.15364	0.18219	0.745835	4713	1	0.66471
Adam30	4	0.013283	0.034559	0.779994	747	3	-0.43595	0.27462	0.33687	0.88814	7400	1	0.53038
Zfp229	4	0.013296	0.034559	0.779994	748	3	-0.46858	0.91884	0.91673	1	17887	0	0
Slc25a41	4	0.013316	0.034559	0.779994	749	2	-0.81863	0.62602	0.58849	0.961492	12043	1	0.26134
Polk	4	0.01333	0.03456	0.779994	750	3	-0.66638	0.91983	0.91915	1	17908	0	0
Nup43	4	0.013344	0.03456	0.779994	751	3	-1.7033	0.63947	0.61633	0.984936	12262	1	0.34347
Xirp2	4	0.013355	0.03456	0.779994	752	3	-0.49894	0.9304	0.93063	1	18112	0	0
Kif7	4	0.013366	0.03456	0.779994	753	1	-0.84789	0.29217	0.36055	0.897147	7800	2	0.26742
Olfr43	4	0.013385	0.03456	0.779994	754	3	-0.44255	0.99345	0.9935	1	19490	0	0
Themis3	4	0.013417	0.03456	0.779994	755	2	-0.62742	0.27555	0.33952	0.891497	7418	2	0.24073
Epha2	4	0.013435	0.03456	0.779994	756	3	-0.38429	0.97002	0.97321	1	18971	0	0
Gkn2	4	0.013467	0.034822	0.779994	757	3	-0.39593	0.95077	0.95639	1	18543	0	0
Tmed1	4	0.013468	0.034822	0.779994	758	2	-0.63948	0.19382	0.21708	0.747354	5588	2	0.3713
Lef1	4	0.013486	0.034823	0.779994	759	3	-0.55626	0.21631	0.24324	0.784074	6084	1	0.53962
Aff3	4	0.013499	0.034823	0.779994	760	3	-0.57649	0.51605	0.51459	0.951241	10418	1	0.29428
Rps6kb2	4	0.0135	0.034823	0.779994	761	2	-0.81184	0.82617	0.81957	1	15944	0	0
Tmeff1	4	0.013513	0.034823	0.779994	762	2	-0.53344	0.72897	0.70823	0.998699	13941	0	0
Zfp871	4	0.013524	0.034981	0.779994	763	3	-0.55746	0.97106	0.97447	1	18988	0	0
Tnnt3	4	0.013541	0.034982	0.779994	764	3	-0.52538	0.20424	0.22227	0.747354	5824	1	0.60698
Cyp26a1	4	0.013549	0.034982	0.779994	765	3	-0.33014	0.81726	0.81509	1	15769	0	0
Ubap1	4	0.013553	0.034982	0.779994	766	3	-0.77151	0.90987	0.90217	1	17683	0	0
Foxp3	4	0.013569	0.035146	0.779994	767	2	-0.5769	0.61435	0.57868	0.951241	11853	1	0.26416
Nav2	4	0.013581	0.035146	0.779994	768	3	-0.45268	0.99198	0.99245	1	19454	0	0
Gpaa1	4	0.013582	0.035146	0.779994	769	2	-0.59614	0.62893	0.59988	0.974903	12088	1	0.27353
Pigr	4	0.013595	0.035146	0.779994	770	2	-0.58451	0.95008	0.95564	1	18523	0	0
Pon3	4	0.01362	0.035296	0.779994	771	1	-0.84807	0.67731	0.65239	0.992077	12903	1	0.19583
Grpr	4	0.013626	0.035296	0.779994	772	3	-0.37535	0.98892	0.98988	1	19394	0	0
Cpsf3l	3	0.013628	0.037103	0.779994	773	2	-1.7445	0.0077332	0.012402	0.421203	704	1	3.1082
Ak7	4	0.013664	0.035296	0.779994	774	2	-1.3111	0.98143	0.98417	1	19229	0	0
Rfx2	4	0.01367	0.035296	0.779994	775	1	-0.93215	0.52865	0.52926	0.951241	10588	1	0.37527
Gabrd	4	0.01368	0.035296	0.779994	776	3	-0.40466	0.81637	0.81509	1	15747	0	0
Dnase2a	4	0.013721	0.035532	0.779994	777	1	-0.80446	0.53656	0.53583	0.951241	10692	1	0.28062
Zic2	4	0.013747	0.035532	0.779994	778	3	-0.34723	0.26281	0.3188	0.872746	7123	1	0.44797
Edar	4	0.013822	0.035532	0.779994	779	1	-1.0162	0.72658	0.70823	0.998699	13883	0	0
Atp6v0d1	4	0.013828	0.035532	0.779994	780	2	-1.5298	0.094246	0.1263	0.706918	3426	2	1.1941
Ppfia1	4	0.013873	0.03569	0.779994	781	2	-0.6656	0.27309	0.33559	0.88814	7365	1	0.40396
Siglecf	4	0.013923	0.03569	0.779994	782	2	-0.52997	0.72226	0.70175	0.998699	13789	0	0
Sbf1	4	0.01393	0.03569	0.779994	783	3	-0.31477	0.40111	0.44231	0.94913	8978	1	0.43264
Slc52a2	4	0.013974	0.035691	0.779994	784	3	-0.64098	0.98015	0.98346	1	19200	0	0
Hoxc13	4	0.014021	0.035691	0.779994	785	3	-0.33	0.8766	0.87342	1	16954	0	0
Zfp296	4	0.014025	0.035691	0.779994	786	3	-0.50591	0.97553	0.97986	1	19082	0	0
Olfr1245	4	0.014028	0.035691	0.779994	787	3	-0.52215	0.6122	0.57198	0.951241	11823	1	0.25163
Tfpt	4	0.014029	0.035691	0.779994	788	2	-0.3473	0.90968	0.90217	1	17681	0	0
Anxa1	4	0.014047	0.03587	0.779994	789	3	-0.4469	0.95311	0.95982	1	18593	0	0
Gimap5	4	0.014063	0.03587	0.779994	790	3	-0.46772	0.36368	0.41594	0.946122	8593	1	0.3985
Taar8a	4	0.014075	0.03587	0.779994	791	2	-0.80328	0.71761	0.69847	0.998699	13679	1	0.17229
Th	4	0.014112	0.03587	0.779994	792	2	-0.72051	0.24481	0.29672	0.860276	6715	2	0.34241
Aqp1	4	0.014126	0.036129	0.779994	793	1	-1.159	0.46455	0.47665	0.951241	9769	1	0.34326
Stap1	4	0.014135	0.036293	0.779994	794	3	-0.51268	0.21767	0.24764	0.793576	6108	1	0.72105
Sh3d19	4	0.014177	0.036293	0.779994	795	2	-0.5552	0.98096	0.984	1	19218	0	0
Swap70	4	0.014187	0.036293	0.779994	796	3	-0.4009	0.99366	0.9937	1	19495	0	0
Itpk1	4	0.01421	0.036454	0.779994	797	2	-0.81285	0.76165	0.75443	1	14617	0	0
6030458C11Rik	4	0.014226	0.036454	0.779994	798	3	-0.39937	0.97795	0.98136	1	19135	0	0
Kiss1r	4	0.01423	0.036454	0.779994	799	2	-0.44119	0.51655	0.51459	0.951241	10422	1	0.31656
Mrps31	4	0.014233	0.036454	0.779994	800	3	-0.47318	0.46234	0.47665	0.951241	9743	1	0.37659
Hist1h4b	3	0.014261	0.037697	0.779994	801	2	-1.5259	0.66529	0.65352	0.992077	12689	0	0
G6pd2	4	0.014278	0.036454	0.779994	802	1	-1.6561	0.96418	0.9687	1	18849	0	0
Mtss1	4	0.014307	0.036454	0.779994	803	2	-0.57477	0.69105	0.66719	0.995374	13155	1	0.20347
Lsm2	3	0.014322	0.037849	0.779994	804	2	-1.6694	0.9012	0.91138	1	17487	0	0
Fam162b	4	0.014329	0.036454	0.779994	805	1	-0.95156	0.10385	0.13344	0.706918	3619	1	0.64824
Mpst	4	0.014363	0.036454	0.779994	806	2	-0.46547	0.74658	0.73447	1	14302	0	0
Gjc1	4	0.014379	0.036454	0.779994	807	2	-0.6298	0.98571	0.98793	1	19322	0	0
Vmn1r158	3	0.014413	0.037849	0.779994	808	2	-1.943	0.97998	0.98042	1	19195	0	0
Rab7	4	0.014419	0.036454	0.779994	809	3	-1.877	0.056416	0.081231	0.640086	2471	1	2.1111
Imp3	3	0.014453	0.038007	0.779994	810	2	-2.1614	0.26199	0.27898	0.838379	7105	1	1.0417
Thap2	4	0.01448	0.039914	0.779994	811	2	-0.75755	0.75885	0.75443	1	14562	0	0
Rtp3	4	0.01449	0.039914	0.779994	812	3	-0.45907	0.94451	0.94862	1	18398	0	0
Tbx3	4	0.014532	0.039914	0.779994	813	3	-0.58735	0.86299	0.86201	1	16666	0	0
Qser1	4	0.014574	0.040081	0.779994	814	2	-0.53423	0.68024	0.65396	0.992077	12947	1	0.24994
Vmn1r6	4	0.014593	0.040081	0.779994	815	3	-1.2726	0.99302	0.99333	1	19481	0	0
Fpr3	4	0.014632	0.040081	0.779994	816	2	-0.56358	0.98487	0.98747	1	19311	0	0
Itgb1bp2	4	0.014633	0.040081	0.779994	817	3	-0.42487	0.82139	0.81737	1	15842	0	0
Cd1d1	4	0.01467	0.040081	0.779994	818	2	-0.72456	0.14912	0.17925	0.745835	4611	1	0.69664
Serpinb9g	4	0.01468	0.040081	0.779994	819	2	-1.5198	0.0058978	0.015535	0.421203	625	1	3.3468
Bod1l	4	0.014683	0.040081	0.779994	820	1	-1.1858	0.061168	0.092297	0.650959	2644	3	0.41139
Olfr68	4	0.014733	0.040081	0.779994	821	1	-0.81373	0.86814	0.8683	1	16773	0	0
Gas6	4	0.01478	0.040081	0.779994	822	3	-0.4834	0.59237	0.56062	0.951241	11517	1	0.29474
Chd1	4	0.014784	0.040081	0.779994	823	2	-0.57933	0.74814	0.73878	1	14334	0	0
Olfr1046	4	0.014808	0.040241	0.779994	824	3	-0.44537	0.85371	0.85355	1	16472	0	0
Jtb	4	0.014835	0.040242	0.779994	825	2	-1.511	0.57328	0.55733	0.951241	11229	1	0.33552
Cltb	4	0.014885	0.040412	0.779994	826	1	-1.3111	0.050001	0.068714	0.594075	2241	2	0.64599
Smad5	4	0.014943	0.040413	0.779994	827	2	-0.65105	0.5241	0.526	0.951241	10524	1	0.38229
Grk4	4	0.014972	0.040615	0.779994	828	2	-0.86412	0.62026	0.57868	0.951241	11955	1	0.25706
Mgat1	4	0.014986	0.040862	0.779994	829	1	-2.6477	0.95139	0.95639	1	18556	0	0
Dnaic1	4	0.014989	0.040862	0.779994	830	3	-0.42119	0.97931	0.98215	1	19175	0	0
Gm14374	4	0.015	0.040862	0.779994	831	2	-0.79789	0.80935	0.81051	1	15588	0	0
Gm13157	2	0.015002	0.024212	0.758534	832	1	-3.2433	0.82316	0.83291	1	15879	0	0
Pou2af1	4	0.015009	0.040862	0.779994	833	3	-0.37504	0.85973	0.85926	1	16600	0	0
Mmp7	4	0.015037	0.040862	0.779994	834	1	-0.80645	0.71765	0.69847	0.998699	13680	1	0.24307
Cntn5	4	0.01504	0.040862	0.779994	835	2	-0.58997	0.77339	0.76946	1	14852	0	0
Slc35a5	4	0.015088	0.040862	0.779994	836	1	-0.86757	0.62239	0.58033	0.953155	11990	1	0.33217
Cul2	4	0.015093	0.040862	0.779994	837	2	-2.8827	0.1992	0.22227	0.747354	5716	1	1.178
March6	4	0.015094	0.040862	0.779994	838	3	-0.50914	0.90197	0.89638	1	17504	0	0
Fam149b	4	0.015115	0.040862	0.779994	839	2	-0.63993	0.86655	0.86739	1	16747	0	0
Arhgef7	4	0.015135	0.040862	0.779994	840	3	-0.49693	0.96415	0.9687	1	18848	0	0
Bdh1	4	0.015138	0.040862	0.779994	841	1	-0.88637	0.047763	0.065037	0.579085	2154	1	0.92103
Mab21l3	4	0.015151	0.041136	0.779994	842	2	-1.2364	0.87205	0.87174	1	16853	0	0
Drosha	4	0.015189	0.041136	0.779994	843	2	-2.0329	0.79121	0.7875	1	15214	0	0
Exd2	4	0.015208	0.041136	0.779994	844	2	-0.47979	0.78464	0.77987	1	15094	0	0
Isg15	4	0.015223	0.041136	0.779994	845	2	-0.7164	0.56628	0.54912	0.951241	11132	1	0.24241
Neto2	4	0.015239	0.041136	0.779994	846	1	-1.0395	0.54617	0.5408	0.951241	10845	1	0.33853
Efhc1	4	0.015278	0.041136	0.779994	847	3	-0.34875	0.17568	0.2047	0.747354	5195	1	0.58821
Ttc39a	4	0.015287	0.041136	0.779994	848	2	-0.59357	0.15084	0.18018	0.745835	4653	1	0.75438
Vav3	4	0.01529	0.041136	0.779994	849	1	-0.91183	0.14868	0.17925	0.745835	4599	2	0.34635
Lgals2	4	0.015341	0.041136	0.779994	850	1	-1.0819	0.2551	0.31026	0.872746	6934	2	0.23577
Gjb3	4	0.015347	0.041136	0.779994	851	3	-0.50975	0.90244	0.89638	1	17508	0	0
Lyg2	4	0.015389	0.041136	0.779994	852	3	-0.62995	0.96014	0.96557	1	18761	0	0
Sec14l5	4	0.01541	0.041303	0.779994	853	2	-0.65305	0.26114	0.3188	0.872746	7084	2	0.22603
Commd10	4	0.015419	0.041303	0.779994	854	3	-0.53856	0.93639	0.93837	1	18241	0	0
Barhl1	4	0.015442	0.041303	0.779994	855	2	-0.66148	0.38783	0.43568	0.94913	8832	1	0.33312
Armcx3	4	0.015492	0.041303	0.779994	856	2	-2.4779	0.94522	0.94906	1	18415	0	0
Brd4	4	0.015543	0.041303	0.779994	857	1	-2.4221	0.14775	0.1774	0.745835	4573	2	0.95836
A430089I19Rik	3	0.015616	0.042452	0.779994	858	1	-4.4264	0.29633	0.31896	0.872746	7895	1	1.3115
Dock10	4	0.015635	0.041303	0.779994	859	2	-0.48162	0.30752	0.37169	0.901147	8053	1	0.45054
Sumf1	4	0.015644	0.041303	0.779994	860	1	-1.205	0.91566	0.91228	1	17805	0	0
Fem1a	4	0.015654	0.041303	0.779994	861	3	-0.3638	0.60748	0.57039	0.951241	11747	1	0.23819
Tex13	4	0.015675	0.041303	0.779994	862	3	-0.47079	0.96149	0.96684	1	18794	0	0
Olfr875	4	0.015745	0.041303	0.779994	863	3	-0.53254	0.53078	0.53097	0.951241	10613	1	0.43428
Dcaf17	4	0.015811	0.041303	0.779994	864	2	-0.50792	0.39794	0.44061	0.94913	8949	1	0.40552
Mrgprg	4	0.015839	0.041488	0.779994	865	3	-0.44811	0.99517	0.9953	1	19520	0	0
Slc17a8	4	0.015846	0.041683	0.779994	866	2	-0.43016	0.56214	0.54744	0.951241	11074	1	0.32096
Sult2a1	4	0.015897	0.041683	0.779994	867	2	-1.3585	0.60165	0.56714	0.951241	11658	1	0.24856
Elac1	4	0.015927	0.041684	0.779994	868	3	-0.42299	0.9384	0.94137	1	18271	0	0
Hyal6	4	0.015969	0.041684	0.779994	869	3	-0.41199	0.83361	0.82613	1	16090	0	0
Xrra1	4	0.015974	0.041684	0.779994	870	3	-0.4317	0.26134	0.3188	0.872746	7089	1	0.50074
Acss1	4	0.01598	0.041684	0.779994	871	3	-0.46497	0.66732	0.64264	0.991846	12733	1	0.21403
Mcam	4	0.015998	0.04186	0.779994	872	1	-0.88668	0.73548	0.71768	1	14074	0	0
Apopt1	4	0.016047	0.042062	0.779994	873	3	-0.423	0.59302	0.56062	0.951241	11523	1	0.29046
Tmem59l	4	0.016049	0.042062	0.779994	874	1	-0.74649	0.92045	0.91975	1	17925	0	0
Dedd2	4	0.016068	0.042062	0.779994	875	2	-0.80966	0.83235	0.82502	1	16068	0	0
Gm6406	4	0.016089	0.042062	0.779994	876	3	-0.41917	0.96702	0.97043	1	18907	0	0
Olfr357	4	0.016132	0.042452	0.779994	877	3	-0.52852	0.16107	0.18539	0.745835	4856	1	0.56725
Agtrap	4	0.01615	0.042452	0.779994	878	2	-0.76424	0.87815	0.87429	1	16984	0	0
Kcna5	4	0.0162	0.042452	0.779994	879	1	-0.96036	0.075541	0.10406	0.650959	3006	2	0.53038
Gtf2a2	4	0.016201	0.042452	0.779994	880	2	-3.0535	0.87301	0.87259	1	16869	0	0
Haus1	3	0.016224	0.043505	0.779994	881	1	-4.3998	0.081815	0.094725	0.650959	3153	2	0.71517
Nufip1	4	0.016231	0.042453	0.779994	882	2	-1.0263	0.78266	0.77987	1	15041	0	0
Pola2	4	0.016251	0.042453	0.779994	883	1	-3.2485	0.0053318	0.014952	0.421203	592	3	1.0358
Rasa4	4	0.016263	0.042453	0.779994	884	3	-0.37023	0.94344	0.94775	1	18374	0	0
Olfr603	4	0.016284	0.042742	0.779994	885	3	-0.46541	0.8757	0.87342	1	16925	0	0
Eif3l	4	0.016301	0.042742	0.779994	886	1	-1.113	0.43959	0.4636	0.951241	9462	1	0.5229
Trim30a	4	0.016403	0.042743	0.779994	887	1	-1.8033	0.7099	0.69517	0.998699	13525	1	0.22453
Fn3k	4	0.016418	0.042743	0.779994	888	3	-0.33544	0.98681	0.98866	1	19355	0	0
Tfpi	4	0.016431	0.042743	0.779994	889	2	-0.66119	0.9524	0.95717	1	18575	0	0
Tspan32	4	0.016453	0.042743	0.779994	890	1	-0.73887	0.027691	0.0347	0.467595	1445	3	0.45343
LOC100038947	4	0.016503	0.042743	0.779994	891	3	-0.51746	0.7353	0.71768	1	14068	0	0
Igfbp2	4	0.016504	0.042743	0.779994	892	1	-0.73959	0.61686	0.57868	0.951241	11898	1	0.23486
Mgarp	4	0.01651	0.042743	0.779994	893	3	-0.40548	0.48369	0.48989	0.951241	9994	1	0.38094
Wfikkn1	4	0.016514	0.042743	0.779994	894	2	-0.65617	0.84177	0.83667	1	16239	0	0
Cp	4	0.016528	0.042943	0.779994	895	2	-1.1178	0.94353	0.94775	1	18376	0	0
Gucd1	4	0.016536	0.042943	0.779994	896	3	-0.61202	0.83541	0.82935	1	16116	0	0
Xaf1	4	0.016551	0.042943	0.779994	897	2	-0.51154	0.51864	0.51945	0.951241	10448	1	0.33851
Aire	4	0.016554	0.042943	0.779994	898	2	-0.60283	0.9769	0.98073	1	19112	0	0
Arf1	4	0.016573	0.042943	0.779994	899	2	-1.525	0.97967	0.98235	1	19186	0	0
Mb	4	0.016605	0.042944	0.779994	900	1	-1.0131	0.89965	0.89487	1	17455	0	0
Rufy4	4	0.016636	0.042944	0.779994	901	3	-0.39756	0.7253	0.70823	0.998699	13856	0	0
Fmn2	4	0.016641	0.042944	0.779994	902	2	-0.58869	0.52731	0.52766	0.951241	10569	1	0.42053
Sod2	4	0.016693	0.043345	0.779994	903	2	-0.69618	0.80098	0.79984	1	15414	0	0
Apbb2	4	0.016694	0.043345	0.779994	904	3	-0.35056	0.63502	0.60647	0.978755	12187	1	0.32561
Wdr35	4	0.016706	0.043345	0.779994	905	1	-1.3483	0.10585	0.13344	0.706918	3660	2	0.48544
Gmnn	4	0.016753	0.043345	0.779994	906	2	-1.0243	0.94927	0.95524	1	18503	0	0
Samd15	4	0.016767	0.043345	0.779994	907	3	-0.62687	0.81904	0.81623	1	15801	0	0
4921524L21Rik	4	0.016768	0.043345	0.779994	908	2	-0.60691	0.77384	0.76946	1	14857	0	0
Triap1	3	0.016771	0.044705	0.779994	909	2	-2.2006	0.64738	0.63986	0.991846	12372	0	0
Hinfp	4	0.016807	0.043345	0.779994	910	1	-3.6052	0.0043429	0.013437	0.421203	519	2	2.4116
Trim21	4	0.01685	0.043345	0.779994	911	3	-0.43323	0.89447	0.89185	1	17350	0	0
Olfr738	4	0.016857	0.043345	0.779994	912	1	-0.94723	0.67078	0.64593	0.991846	12801	1	0.2322
Ralgps1	4	0.016863	0.043345	0.779994	913	3	-0.41182	0.99426	0.99447	1	19503	0	0
Cd28	4	0.016868	0.043345	0.779994	914	3	-0.56129	0.57918	0.55733	0.951241	11323	1	0.27222
Vamp3	4	0.016874	0.043345	0.779994	915	2	-0.55207	0.10813	0.13656	0.713923	3708	1	0.86849
Ndrg4	4	0.016908	0.043345	0.779994	916	3	-0.58834	0.94145	0.94506	1	18324	0	0
Srsf10	4	0.016916	0.043345	0.779994	917	3	-0.43148	0.96409	0.9687	1	18844	0	0
Hmg20b	4	0.016927	0.043345	0.779994	918	2	-0.71881	0.13194	0.1568	0.728596	4224	1	0.64324
Aldh3b2	4	0.016971	0.043345	0.779994	919	3	-0.33158	0.99249	0.99274	1	19466	0	0
Cln3	4	0.016982	0.043345	0.779994	920	3	-0.6464	0.97797	0.98136	1	19137	0	0
Xlr5b	4	0.017007	0.043345	0.779994	921	3	-0.79866	0.87665	0.87342	1	16955	0	0
Gm5111	4	0.017027	0.043551	0.779994	922	3	-0.53997	0.7546	0.75029	1	14474	0	0
Arl2	3	0.01704	0.045408	0.779994	923	1	-3.2063	0.12354	0.13788	0.713923	4045	1	1.7418
Zyx	4	0.017049	0.04365	0.779994	924	3	-0.40516	0.99492	0.99501	1	19514	0	0
Tas2r105	4	0.017059	0.043749	0.779994	925	2	-0.62998	0.67419	0.64914	0.991846	12855	1	0.25774
Clic6	4	0.017092	0.043749	0.779994	926	3	-0.64932	0.80686	0.80697	1	15534	0	0
Nr3c2	4	0.01711	0.043749	0.779994	927	1	-1.0268	0.35588	0.41268	0.946122	8508	1	0.42164
Olfr1261	4	0.017125	0.04375	0.779994	928	3	-0.39104	0.96551	0.96986	1	18870	0	0
Defa25	3	0.017141	0.045408	0.779994	929	3	-0.56909	0.98286	0.98346	1	19261	0	0
Rab2b	4	0.017145	0.04375	0.779994	930	3	-0.52369	0.64904	0.62123	0.985661	12403	1	0.21121
Defb50	4	0.01716	0.04375	0.779994	931	3	-0.51379	0.95941	0.96431	1	18742	0	0
Nup37	4	0.017162	0.04375	0.779994	932	2	-0.68343	0.77228	0.76809	1	14831	0	0
Pitx2	4	0.017202	0.044021	0.779994	933	3	-0.58068	0.91776	0.91421	1	17860	0	0
Gm5414	4	0.017206	0.044021	0.779994	934	3	-0.38283	0.6261	0.58849	0.961492	12045	1	0.22352
Sel1l2	4	0.017211	0.044022	0.779994	935	1	-0.94406	0.81787	0.81509	1	15779	0	0
Glce	3	0.017253	0.045409	0.779994	936	2	-0.58255	0.96082	0.96522	1	18780	0	0
Dhx40	4	0.017258	0.044248	0.779994	937	3	-0.34458	0.99342	0.9935	1	19489	0	0
Timm9	4	0.017262	0.044248	0.779994	938	3	-2.2341	0.98943	0.99026	1	19406	0	0
Atp6v0b	3	0.017272	0.045409	0.779994	939	2	-1.8957	0.42121	0.41026	0.942914	9230	1	0.61995
Hipk4	4	0.017276	0.044248	0.779994	940	3	-0.54422	0.98292	0.98538	1	19266	0	0
Fam46c	4	0.017307	0.044249	0.779994	941	2	-0.5388	0.24833	0.30099	0.866384	6790	1	0.49798
Cubn	4	0.017343	0.044249	0.779994	942	3	-0.44171	0.78153	0.77987	1	15012	0	0
Sepn1	4	0.017363	0.044437	0.779994	943	1	-0.90302	0.64018	0.61633	0.984936	12271	1	0.22418
Olfr275	4	0.017398	0.044437	0.779994	944	3	-0.40551	0.99516	0.9953	1	19518	0	0
Myb	4	0.017413	0.044438	0.779994	945	1	-0.98443	0.83535	0.82935	1	16114	0	0
Tmem225	4	0.017417	0.044438	0.779994	946	3	-0.58141	0.89999	0.89487	1	17465	0	0
1700109H08Rik	4	0.017437	0.044438	0.779994	947	2	-0.60529	0.87352	0.87259	1	16878	0	0
Olfr974	4	0.017451	0.044438	0.779994	948	3	-0.42245	0.73337	0.71611	1	14030	0	0
Ccdc66	4	0.017467	0.047835	0.779994	949	3	-0.28827	0.96957	0.97266	1	18955	0	0
Csnk1g2	4	0.017483	0.047835	0.779994	950	2	-0.74813	0.60174	0.56714	0.951241	11660	1	0.29971
Fzr1	4	0.017514	0.047835	0.779994	951	1	-1.7163	0.19091	0.21506	0.747354	5534	2	0.4736
Unc93a	4	0.017551	0.047835	0.779994	952	3	-1.3904	0.90351	0.89788	1	17529	0	0
Btbd11	4	0.017575	0.047835	0.779994	953	2	-0.79281	0.94119	0.94506	1	18317	0	0
Gatad2a	4	0.017666	0.047835	0.779994	954	3	-0.33462	0.77996	0.77861	1	14979	0	0
Epc1	4	0.017675	0.047835	0.779994	955	2	-0.56114	0.97314	0.97717	1	19034	0	0
Lpar1	4	0.017701	0.047835	0.779994	956	3	-0.48096	0.86244	0.86201	1	16654	0	0
Ly6g6d	4	0.017716	0.047835	0.779994	957	1	-0.92387	0.98597	0.98808	1	19329	0	0
Oxa1l	4	0.017721	0.047835	0.779994	958	2	-1.7472	0.39643	0.44061	0.94913	8932	1	0.52047
Naa10	4	0.017722	0.047835	0.779994	959	3	-0.38032	0.85062	0.84574	1	16410	0	0
Sertad4	4	0.017767	0.047835	0.779994	960	3	-0.46048	0.68898	0.66222	0.993912	13108	1	0.19416
Rbpms2	4	0.017814	0.047835	0.779994	961	3	-0.35616	0.98772	0.9888	1	19367	0	0
Olfml1	4	0.017817	0.047835	0.779994	962	1	-0.82016	0.11637	0.14299	0.720424	3886	2	0.57985
Syce1	4	0.017878	0.047835	0.779994	963	3	-0.37924	0.8886	0.88644	1	17220	0	0
Atf1	4	0.017884	0.047835	0.779994	964	2	-0.59079	0.091963	0.11903	0.686067	3369	1	0.93018
Stard10	4	0.017893	0.047835	0.779994	965	3	-0.44738	0.9902	0.99098	1	19422	0	0
Gm10639	4	0.017912	0.047835	0.779994	966	3	-0.64159	0.78664	0.78249	1	15125	0	0
Trip6	4	0.017954	0.047835	0.779994	967	3	-0.35896	0.94576	0.95034	1	18424	0	0
Cox4i2	4	0.017969	0.048056	0.779994	968	1	-0.93488	0.5556	0.54744	0.951241	10979	1	0.36007
Spock3	4	0.018008	0.048056	0.779994	969	2	-0.58659	0.67512	0.64914	0.991846	12869	1	0.2141
Sppl2a	4	0.018019	0.048057	0.779994	970	2	-0.6174	0.9861	0.98823	1	19335	0	0
Rbm14	4	0.018069	0.048258	0.779994	971	1	-1.0693	0.043261	0.058432	0.56742	1995	3	0.63464
Olfr1014	4	0.018102	0.048258	0.779994	972	3	-0.43923	0.96588	0.97014	1	18877	0	0
Atp4a	4	0.018117	0.048258	0.779994	973	2	-0.52455	0.87638	0.87342	1	16949	0	0
Gdpd5	4	0.01812	0.048258	0.779994	974	2	-0.71642	0.98089	0.98382	1	19217	0	0
Rarres1	4	0.018121	0.048258	0.779994	975	3	-0.41231	0.44573	0.4685	0.951241	9544	1	0.48621
Wars	4	0.018133	0.048258	0.779994	976	3	-1.0557	0.89965	0.89487	1	17452	0	0
Atp10a	4	0.01814	0.048258	0.779994	977	2	-0.65756	0.79797	0.79492	1	15350	0	0
Hspa8	2	0.018161	0.032089	0.779994	978	1	-4.0336	0.015853	0.01442	0.421203	1021	1	2.4895
Serinc3	4	0.01817	0.048258	0.779994	979	1	-1.4087	0.90913	0.90217	1	17663	0	0
F2r	4	0.018182	0.048258	0.779994	980	3	-0.46671	0.20374	0.22227	0.747354	5811	1	0.62913
Rabggta	4	0.018203	0.048258	0.779994	981	2	-1.646	0.34944	0.40273	0.932491	8443	1	0.9061
Timm21	4	0.018221	0.048258	0.779994	982	3	-0.34209	0.9862	0.98837	1	19340	0	0
Havcr2	4	0.018221	0.048258	0.779994	983	2	-0.58036	0.23188	0.26947	0.821998	6424	1	0.51955
Rora	4	0.01827	0.048259	0.779994	984	3	-0.39315	0.86531	0.86739	1	16722	0	0
Tcf7l2	4	0.018271	0.048259	0.779994	985	1	-1.4521	0.33375	0.38967	0.917483	8307	1	0.55138
Rpl7l1	3	0.018292	0.046088	0.779994	986	1	-3.0725	0.14743	0.17702	0.745835	4569	2	0.97161
Igsf5	4	0.018293	0.048259	0.779994	987	3	-0.41326	0.89596	0.89261	1	17386	0	0
Ugt1a10	4	0.018389	0.048259	0.779994	988	3	-0.44933	0.98058	0.98364	1	19210	0	0
Setd8	4	0.018423	0.048553	0.779994	989	3	-0.75849	0.38858	0.43568	0.94913	8845	1	0.47296
Ptbp3	4	0.018493	0.048554	0.779994	990	3	-0.46651	0.85791	0.85926	1	16555	0	0
Tbcd	4	0.018599	0.048771	0.779994	991	1	-4.4936	0.84706	0.84073	1	16330	0	0
Bbs1	4	0.018603	0.048771	0.779994	992	2	-0.64762	0.95488	0.9609	1	18638	0	0
Mfsd7c	4	0.018619	0.048771	0.779994	993	2	-0.74443	0.096619	0.12885	0.706918	3467	2	0.49083
Lkaaear1	4	0.018627	0.048771	0.779994	994	3	-0.51619	0.2056	0.22227	0.747354	5849	1	0.4968
Ackr3	4	0.018674	0.049064	0.779994	995	2	-0.6069	0.80941	0.81051	1	15590	0	0
Rhox2d	4	0.018682	0.049064	0.779994	996	2	-1.6167	0.72206	0.70175	0.998699	13782	0	0
Gpx7	4	0.018699	0.049064	0.779994	997	3	-0.42118	0.97374	0.97813	1	19040	0	0
Srpx2	4	0.018707	0.049064	0.779994	998	3	-0.43208	0.75595	0.75307	1	14509	0	0
Aste1	4	0.018722	0.049064	0.779994	999	2	-0.64694	0.78668	0.78249	1	15126	0	0
Cyp3a13	4	0.018726	0.049064	0.779994	1000	2	-0.59464	0.62759	0.59342	0.967226	12071	1	0.27839
Slc44a2	4	0.018776	0.049064	0.779994	1001	1	-1.1191	0.24871	0.30284	0.869033	6797	2	0.26843
Aggf1	4	0.018809	0.049064	0.779994	1002	2	-0.74866	0.56335	0.54744	0.951241	11095	1	0.24184
Olfr66	4	0.018826	0.049064	0.779994	1003	1	-0.86186	0.045925	0.062502	0.579085	2077	2	0.50512
4922502D21Rik	4	0.018863	0.049277	0.779994	1004	3	-0.41888	0.67685	0.65077	0.992077	12897	1	0.20943
Olfr521	4	0.018864	0.049277	0.779994	1005	2	-0.65233	0.89734	0.89261	1	17423	0	0
Myo19	4	0.018877	0.049277	0.779994	1006	1	-0.71878	0.81905	0.81623	1	15802	0	0
Abhd5	4	0.018898	0.049277	0.779994	1007	3	-0.41763	0.41909	0.44724	0.94913	9200	1	0.38926
Sptssa	3	0.018974	0.046089	0.779994	1008	2	-2.3369	0.69787	0.69357	0.998699	13288	0	0
Fam19a3	4	0.018978	0.049542	0.779994	1009	1	-0.79775	0.71067	0.69517	0.998699	13538	1	0.17705
D430019H16Rik	4	0.019028	0.049542	0.779994	1010	2	-0.49761	0.7448	0.72837	1	14264	0	0
Rbp4	4	0.019031	0.049542	0.779994	1011	2	-0.48532	0.81451	0.81509	1	15699	0	0
Txnl4a	4	0.019073	0.049542	0.779994	1012	3	-1.6006	0.33815	0.39538	0.926534	8345	1	1.3647
Pfdn2	4	0.019073	0.049542	0.779994	1013	3	-1.7403	0.99255	0.99274	1	19472	0	0
Abhd14a	4	0.019079	0.049542	0.779994	1014	2	-0.58797	0.78978	0.78503	1	15189	0	0
Ddx20	3	0.019088	0.046089	0.779994	1015	2	-1.2005	0.17182	0.20767	0.747354	5098	1	1.6048
Capzb	4	0.019129	0.049829	0.779994	1016	1	-1.2837	0.0071964	0.016239	0.421203	676	2	2.0648
Srsf3	4	0.019131	0.049829	0.779994	1017	2	-2.7393	0.12781	0.15498	0.721856	4129	1	1.7737
Klra7	4	0.019185	0.04983	0.779994	1018	3	-0.46047	0.074897	0.10405	0.650959	2993	1	1.7545
Cyp2w1	4	0.019217	0.050078	0.779994	1019	3	-0.48721	0.8702	0.87004	1	16820	0	0
Plbd2	4	0.01923	0.050078	0.779994	1020	2	-0.52027	0.96774	0.971	1	18923	0	0
Pqlc3	4	0.019276	0.050078	0.779994	1021	3	-0.45535	0.89376	0.89035	1	17334	0	0
Kcnh5	4	0.01928	0.050078	0.779994	1022	1	-0.93852	0.037091	0.049711	0.546606	1761	3	0.33439
Cstl1	4	0.019331	0.050078	0.779994	1023	1	-1.1413	0.88324	0.88246	1	17101	0	0
Rpap1	4	0.01936	0.050298	0.779994	1024	2	-1.6282	0.33815	0.39538	0.926534	8343	1	1.3647
Lrp1b	4	0.019381	0.050298	0.779994	1025	1	-0.83511	0.92818	0.93011	1	18064	0	0
Ccdc86	4	0.019399	0.050299	0.779994	1026	3	-0.64332	0.87567	0.87342	1	16924	0	0
Gm8300	3	0.019416	0.046334	0.779994	1027	2	-1.4601	0.26621	0.28647	0.846103	7200	1	1.3647
Cym	4	0.019432	0.050299	0.779994	1028	2	-0.64422	0.9739	0.97813	1	19045	0	0
Ip6k2	4	0.019482	0.050537	0.779994	1029	1	-0.85438	0.81592	0.81509	1	15734	0	0
Smim12	4	0.019537	0.054068	0.779994	1030	2	-0.652	0.42134	0.44888	0.950867	9234	1	0.31199
Ephb4	4	0.019633	0.054068	0.779994	1031	1	-0.7452	0.89664	0.89261	1	17399	0	0
Baz1a	4	0.019635	0.054068	0.779994	1032	3	-0.36284	0.78573	0.78118	1	15112	0	0
Cpa5	4	0.019684	0.054069	0.779994	1033	3	-0.52839	0.81831	0.81509	1	15786	0	0
Rtn4	4	0.019731	0.054069	0.779994	1034	3	-0.30554	0.93524	0.93739	1	18208	0	0
Fam107a	4	0.019734	0.054069	0.779994	1035	1	-0.96494	0.67796	0.65239	0.992077	12911	1	0.25384
Chsy1	4	0.01978	0.054069	0.779994	1036	3	-0.52304	0.68202	0.65724	0.992077	12974	1	0.19548
Pphln1	4	0.019835	0.054295	0.779994	1037	2	-0.59233	0.12212	0.15322	0.721856	4014	1	0.82092
Casp8ap2	4	0.019852	0.054295	0.779994	1038	3	-0.51758	0.91632	0.91228	1	17829	0	0
Ltv1	4	0.019861	0.054295	0.779994	1039	2	-2.4051	0.72275	0.70336	0.998699	13801	0	0
Prelid1	4	0.019886	0.054295	0.779994	1040	2	-2.1797	0.010298	0.018338	0.421203	817	1	3.1082
Nfic	4	0.019893	0.054295	0.779994	1041	2	-0.49011	0.74155	0.72684	1	14200	0	0
Stk32b	4	0.019909	0.054295	0.779994	1042	3	-0.42388	0.63531	0.60647	0.978755	12194	1	0.23409
Samd4	4	0.01991	0.054295	0.779994	1043	3	-0.52844	0.88925	0.88644	1	17236	0	0
Stard4	4	0.019963	0.054295	0.779994	1044	3	-0.35868	0.87042	0.87088	1	16824	0	0
Hist1h4i	4	0.019986	0.054295	0.779994	1045	2	-1.0519	0.75142	0.74454	1	14410	0	0
Zfp668	4	0.019991	0.054295	0.779994	1046	2	-0.56696	0.28012	0.34823	0.896426	7530	1	0.60333
Colec11	4	0.019994	0.054295	0.779994	1047	3	-0.35884	0.5765	0.55733	0.951241	11282	1	0.31346
Notch2	4	0.020037	0.054295	0.779994	1048	1	-0.81514	0.4493	0.47173	0.951241	9589	1	0.38369
Cpne4	4	0.020071	0.054295	0.779994	1049	3	-0.39366	0.59994	0.56714	0.951241	11628	1	0.26839
Nudt5	4	0.020073	0.054295	0.779994	1050	2	-0.58268	0.94046	0.94371	1	18307	0	0
Rexo1	4	0.020087	0.054295	0.779994	1051	1	-1.5703	0.41469	0.4456	0.94913	9152	1	0.46819
Arl3	4	0.020089	0.054295	0.779994	1052	2	-0.56753	0.47007	0.48162	0.951241	9842	1	0.32842
Wdr77	4	0.020103	0.054295	0.779994	1053	3	-1.5732	0.93552	0.93789	1	18217	0	0
Gsr	4	0.020128	0.054295	0.779994	1054	3	-0.45183	0.98193	0.98435	1	19241	0	0
Rabif	4	0.02016	0.054295	0.779994	1055	3	-1.0692	0.98939	0.99026	1	19405	0	0
Igsf9	4	0.020197	0.054295	0.779994	1056	3	-0.4039	0.88572	0.88404	1	17155	0	0
Clcn4-2	4	0.020204	0.054295	0.779994	1057	2	-0.54928	0.94608	0.95077	1	18437	0	0
Tuft1	4	0.020238	0.054295	0.779994	1058	1	-0.8509	0.085902	0.11143	0.666494	3246	2	0.49039
Gnal	4	0.020248	0.054296	0.779994	1059	3	-0.41896	0.98317	0.98554	1	19273	0	0
Heph	4	0.020269	0.054296	0.779994	1060	3	-0.48979	0.29922	0.36841	0.901147	7962	1	0.4318
Ripply1	4	0.020289	0.054296	0.779994	1061	1	-0.87829	0.55902	0.54744	0.951241	11032	1	0.39423
Ccar2	4	0.020295	0.054296	0.779994	1062	3	-0.38349	0.58435	0.55733	0.951241	11393	1	0.26202
Kap	4	0.02031	0.054296	0.779994	1063	2	-0.53104	0.76537	0.75721	1	14687	0	0
Tmed5	4	0.020339	0.054296	0.779994	1064	2	-0.6162	0.94272	0.94689	1	18356	0	0
Taar7d	4	0.020351	0.054296	0.779994	1065	3	-0.52915	0.9108	0.90362	1	17707	0	0
Hif3a	4	0.020371	0.054296	0.779994	1066	3	-0.33725	0.86078	0.86018	1	16621	0	0
Zfp346	4	0.020401	0.054296	0.779994	1067	2	-0.65283	0.50445	0.51131	0.951241	10260	1	0.36105
Exoc2	4	0.020417	0.054296	0.779994	1068	2	-0.96174	0.39573	0.43897	0.94913	8925	1	0.45008
Zic3	4	0.020434	0.054296	0.779994	1069	2	-0.65215	0.91587	0.91228	1	17813	0	0
Ifna6	4	0.020468	0.054296	0.779994	1070	3	-0.58677	0.17688	0.2047	0.747354	5220	1	0.85218
Leng9	4	0.02049	0.054296	0.779994	1071	2	-0.58194	0.98839	0.98936	1	19382	0	0
Rcc1	4	0.020541	0.054296	0.779994	1072	1	-4.4335	0.060012	0.089361	0.650959	2599	1	2.1426
Lbx2	4	0.020591	0.054296	0.779994	1073	1	-0.83219	0.61786	0.57868	0.951241	11912	1	0.26527
Arhgef9	4	0.020595	0.054296	0.779994	1074	3	-0.31851	0.35856	0.41594	0.946122	8532	1	0.36236
Sirpb1b	4	0.020607	0.054296	0.779994	1075	2	-0.97252	0.83603	0.8304	1	16129	0	0
Il2rg	4	0.020612	0.054296	0.779994	1076	3	-0.39899	0.20482	0.22227	0.747354	5833	1	0.5441
Slc25a15	4	0.020623	0.054296	0.779994	1077	2	-0.56364	0.86945	0.87004	1	16804	0	0
Gltp	4	0.020626	0.054296	0.779994	1078	3	-0.35082	0.98385	0.98653	1	19290	0	0
Lce1l	4	0.020641	0.054296	0.779994	1079	1	-0.53159	0.95168	0.95678	1	18561	0	0
Efcab12	4	0.020662	0.054296	0.779994	1080	3	-0.44063	0.52357	0.526	0.951241	10519	1	0.38873
Vti1a	4	0.020692	0.054296	0.779994	1081	1	-0.76073	0.76305	0.7558	1	14645	0	0
Tfg	4	0.020706	0.054519	0.779994	1082	2	-1.4746	0.92297	0.9239	1	17971	0	0
D8Ertd738e	4	0.020745	0.054519	0.779994	1083	3	-0.59468	0.65244	0.62617	0.988026	12461	1	0.55296
Mtmr6	4	0.020764	0.054519	0.779994	1084	2	-0.99271	0.96353	0.9687	1	18833	0	0
Cep170b	4	0.020767	0.054519	0.779994	1085	1	-4.4264	0.18588	0.20882	0.747354	5416	2	0.40679
Mslnl	4	0.020781	0.054519	0.779994	1086	2	-0.56952	0.94726	0.95158	1	18465	0	0
Sgca	4	0.020814	0.05452	0.779994	1087	3	-0.47882	0.88715	0.88487	1	17191	0	0
Tuba1a	3	0.02083	0.047417	0.779994	1088	1	-3.2879	0.025892	0.035334	0.469999	1381	2	1.2447
Ms4a6c	4	0.020843	0.05452	0.779994	1089	1	-0.55875	0.25101	0.30536	0.869364	6841	2	0.3868
Jrk	4	0.020865	0.05452	0.779994	1090	3	-0.38772	0.45737	0.47334	0.951241	9690	1	0.37574
Ruvbl2	2	0.02091	0.034694	0.779994	1091	2	-2.4618	0.97507	0.97923	1	19076	0	0
S100a1	4	0.020944	0.055048	0.779994	1092	2	-0.47541	0.1572	0.18317	0.745835	4781	1	0.67522
Pnkd	4	0.02098	0.055048	0.779994	1093	2	-0.55244	0.96485	0.96929	1	18859	0	0
Tex15	4	0.020994	0.055048	0.779994	1094	2	-0.62046	0.80024	0.79859	1	15397	0	0
Pcna	2	0.02102	0.034694	0.779994	1095	2	-1.9828	0.97898	0.98299	1	19162	0	0
Mrto4	2	0.02102	0.034694	0.779994	1096	2	-1.4828	0.97898	0.98299	1	19163	0	0
Psma3	2	0.02102	0.034694	0.779994	1097	2	-1.5523	0.97898	0.98299	1	19161	0	0
Slc10a1	4	0.021022	0.055048	0.779994	1098	2	-0.6387	0.1826	0.20668	0.747354	5349	2	0.38042
Amdhd2	4	0.021044	0.055048	0.779994	1099	1	-0.64221	0.68524	0.65893	0.992077	13039	1	0.2287
Ect2	2	0.021062	0.034694	0.779994	1100	1	-1.1971	0.69572	0.6844	0.998699	13241	0	0
Lcn8	4	0.021081	0.055048	0.779994	1101	2	-0.53689	0.68864	0.66057	0.992422	13100	1	0.23504
Zfp282	4	0.021089	0.055048	0.779994	1102	2	-0.62126	0.15815	0.18317	0.745835	4799	1	0.52651
Chst13	4	0.021095	0.055048	0.779994	1103	1	-0.58038	0.21052	0.23319	0.767549	5967	2	0.34489
Rab10	4	0.021101	0.055048	0.779994	1104	2	-1.8248	0.62986	0.60155	0.974903	12102	1	0.75704
Ddx1	4	0.021145	0.055048	0.779994	1105	2	-0.8939	0.2248	0.25951	0.810039	6266	2	0.61998
4932429P05Rik	4	0.021173	0.055048	0.779994	1106	2	-0.67159	0.93415	0.93594	1	18190	0	0
Tcte3	4	0.021183	0.055048	0.779994	1107	3	-0.45982	0.44464	0.4685	0.951241	9529	1	0.41829
Nprl2	4	0.021196	0.055048	0.779994	1108	2	-0.49503	0.31944	0.37827	0.903846	8165	1	0.43376
Mamdc2	4	0.021265	0.055048	0.779994	1109	2	-0.56626	0.89431	0.89109	1	17348	0	0
G3bp2	4	0.021296	0.055048	0.779994	1110	2	-0.55078	0.2446	0.29672	0.860276	6709	1	0.59232
Bloc1s1	4	0.021323	0.055299	0.779994	1111	2	-0.57872	0.97995	0.98292	1	19193	0	0
Cars	3	0.021335	0.047698	0.779994	1112	2	-1.5213	0.26379	0.28564	0.845732	7144	1	0.71323
Fbxw19	4	0.021347	0.0553	0.779994	1113	1	-0.86483	0.93397	0.93594	1	18184	0	0
Kcnk18	4	0.021357	0.0553	0.779994	1114	2	-0.52985	0.28634	0.35393	0.897147	7668	1	0.42483
Slc45a3	4	0.021429	0.055552	0.779994	1115	2	-0.48267	0.73359	0.71611	1	14034	0	0
Elmod2	4	0.021445	0.055552	0.779994	1116	3	-0.38581	0.61721	0.57868	0.951241	11903	1	0.35282
Relt	4	0.021454	0.055552	0.779994	1117	3	-0.65622	0.94788	0.95241	1	18479	0	0
Gm4846	4	0.021462	0.055552	0.779994	1118	3	-0.41026	0.83215	0.82393	1	16064	0	0
Uqcr10	4	0.02153	0.055552	0.779994	1119	2	-2.449	0.88319	0.88246	1	17099	0	0
Vmn2r49	4	0.02153	0.055552	0.779994	1120	3	-1.2726	0.90948	0.90217	1	17676	0	0
Pcnx	4	0.021564	0.055552	0.779994	1121	3	-0.42096	0.97398	0.97813	1	19047	0	0
Tnip3	4	0.021579	0.055552	0.779994	1122	3	-0.46613	0.96611	0.97014	1	18885	0	0
Tor2a	4	0.021593	0.055812	0.779994	1123	2	-0.57392	0.83551	0.82935	1	16119	0	0
Ssty1	2	0.021627	0.034916	0.779994	1124	2	-1.416	0.97837	0.98274	1	19150	0	0
Vmn1r24	4	0.021636	0.055812	0.779994	1125	3	-0.42257	0.57176	0.55733	0.951241	11206	1	0.31995
Serpinb6c	4	0.021649	0.055812	0.779994	1126	1	-0.92872	0.25795	0.31454	0.872746	6998	1	0.49509
Hnrnpd	4	0.021668	0.055812	0.779994	1127	3	-0.58185	0.98441	0.98715	1	19304	0	0
Gm14137	4	0.021699	0.056092	0.779994	1128	1	-0.7355	0.10416	0.13344	0.706918	3623	2	0.4602
B3gnt9	4	0.021726	0.056092	0.779994	1129	3	-0.40972	0.18037	0.20569	0.747354	5304	1	0.56418
Grasp	4	0.021749	0.056092	0.779994	1130	2	-0.5686	0.44796	0.47173	0.951241	9570	1	0.41678
Gm1979	2	0.021752	0.034916	0.779994	1131	2	-0.64805	0.97825	0.98274	1	19145	0	0
Olfr681	4	0.021788	0.056092	0.779994	1132	2	-0.63212	0.55921	0.54744	0.951241	11033	1	0.3577
Eci3	4	0.021798	0.056092	0.779994	1133	3	-0.47243	0.36405	0.41594	0.946122	8596	1	0.43417
Rab3c	4	0.021821	0.056092	0.779994	1134	3	-0.45356	0.91147	0.9043	1	17723	0	0
Sc5d	4	0.021847	0.056092	0.779994	1135	2	-0.5835	0.92367	0.9239	1	17983	0	0
Fam84a	4	0.02185	0.056092	0.779994	1136	1	-0.76811	0.46899	0.48162	0.951241	9827	1	0.34629
Ceacam1	4	0.021901	0.056092	0.779994	1137	3	-0.32397	0.92498	0.92503	1	18008	0	0
Cd47	4	0.021906	0.056092	0.779994	1138	3	-0.37781	0.98319	0.98554	1	19274	0	0
Zswim2	4	0.021936	0.056092	0.779994	1139	3	-0.31899	0.96661	0.97014	1	18898	0	0
Becn1	4	0.021944	0.056092	0.779994	1140	3	-0.92252	0.93294	0.93336	1	18160	0	0
Slc35a1	4	0.021949	0.056092	0.779994	1141	3	-0.41034	0.97982	0.98273	1	19190	0	0
P4ha1	4	0.022001	0.056092	0.779994	1142	1	-0.81574	0.5779	0.55733	0.951241	11301	1	0.30199
Theg	4	0.022009	0.056092	0.779994	1143	3	-0.39104	0.96274	0.96838	1	18817	0	0
Dnah7a	4	0.022022	0.056093	0.779994	1144	3	-0.43077	0.58242	0.55733	0.951241	11364	1	0.28667
Frmd4a	4	0.022037	0.056093	0.779994	1145	3	-0.33152	0.99518	0.99538	1	19521	0	0
Sh3rf1	4	0.022043	0.056093	0.779994	1146	2	-0.5747	0.96169	0.96684	1	18799	0	0
Plp2	4	0.02206	0.056093	0.779994	1147	2	-1.084	0.2589	0.31454	0.872746	7026	2	0.28689
Osbp2	4	0.022102	0.056093	0.779994	1148	1	-0.82872	0.89276	0.88879	1	17311	0	0
Ppp1r14a	4	0.022111	0.056093	0.779994	1149	3	-0.39959	0.99536	0.99565	1	19526	0	0
Htr5b	4	0.022123	0.056093	0.779994	1150	3	-0.33303	0.90853	0.90148	1	17649	0	0
Bcam	4	0.022136	0.056093	0.779994	1151	3	-0.45737	0.92455	0.92447	1	18000	0	0
Npc1	4	0.022152	0.056093	0.779994	1152	2	-0.68238	0.92273	0.9239	1	17966	0	0
Upb1	3	0.022229	0.047989	0.779994	1153	2	-0.52652	0.8063	0.80412	1	15522	0	0
Asb5	4	0.022233	0.056093	0.779994	1154	3	-0.46655	0.96067	0.96589	1	18776	0	0
Gmpr	4	0.022251	0.056093	0.779994	1155	3	-0.34946	0.94947	0.95524	1	18510	0	0
Krt23	4	0.022253	0.056093	0.779994	1156	2	-0.775	0.7658	0.75721	1	14696	0	0
Dydc2	4	0.022259	0.056093	0.779994	1157	3	-0.30467	0.66462	0.63937	0.991846	12675	1	0.26662
Scg3	4	0.022307	0.056093	0.779994	1158	3	-0.40398	0.57489	0.55733	0.951241	11249	1	0.32873
Cplx2	4	0.022328	0.056093	0.779994	1159	1	-3.4329	0.8986	0.89416	1	17444	0	0
Cdk5	4	0.022348	0.056401	0.779994	1160	3	-0.42492	0.97236	0.97645	1	19016	0	0
Ifi205	4	0.022348	0.056401	0.779994	1161	3	-0.34305	0.66715	0.64264	0.991846	12728	1	0.21243
Chmp2a	3	0.02236	0.047989	0.779994	1162	2	-2.4058	0.82372	0.81616	1	15891	0	0
Tex19.1	4	0.022398	0.056401	0.779994	1163	3	-0.38612	0.44103	0.46686	0.951241	9478	1	0.36557
Loh12cr1	4	0.022404	0.056401	0.779994	1164	2	-1.1151	0.92794	0.92786	1	18060	0	0
Slc16a12	4	0.022442	0.056401	0.779994	1165	3	-0.34523	0.97674	0.98073	1	19108	0	0
H2afy2	4	0.022453	0.056401	0.779994	1166	3	-0.44132	0.72999	0.70823	0.998699	13961	0	0
Acsm5	4	0.022454	0.056401	0.779994	1167	3	-0.52093	0.91981	0.91915	1	17907	0	0
Kif22	4	0.022504	0.056401	0.779994	1168	2	-0.57704	0.98077	0.98382	1	19213	0	0
Nrxn3	4	0.022531	0.056401	0.779994	1169	2	-0.53369	0.79552	0.7912	1	15299	0	0
Hoxa7	4	0.022604	0.056401	0.779994	1170	3	-0.45705	0.46458	0.47665	0.951241	9770	1	0.43018
Vmn1r91	2	0.022606	0.037372	0.779994	1171	1	-2.969	0.61233	0.60407	0.978343	11824	0	0
Lrr1	4	0.022652	0.056721	0.779994	1172	3	-1.5405	0.89173	0.88802	1	17292	0	0
Gm5634	4	0.022664	0.056721	0.779994	1173	2	-0.69023	0.58744	0.55896	0.951241	11439	1	0.38068
Rfc2	3	0.022691	0.047989	0.779994	1174	2	-2.9185	0.0045605	0.0095704	0.421203	531	1	3.3395
Gm10406	3	0.022691	0.047989	0.779994	1175	2	-2.1878	0.10917	0.12041	0.69379	3729	1	1.8013
Trex2	4	0.022712	0.057299	0.779994	1176	2	-0.49374	0.49086	0.49814	0.951241	10087	1	0.38913
Cdadc1	4	0.022721	0.057299	0.779994	1177	2	-0.46913	0.83292	0.82613	1	16077	0	0
Serpinb7	4	0.022756	0.057299	0.779994	1178	3	-0.42194	0.82672	0.8207	1	15954	0	0
Trim16	4	0.02285	0.057551	0.779994	1179	3	-0.50509	0.89651	0.89261	1	17395	0	0
Fsd2	4	0.022856	0.057551	0.779994	1180	2	-0.62106	0.74259	0.72684	1	14222	0	0
Myc	4	0.022876	0.057551	0.779994	1181	2	-2.223	0.31856	0.37827	0.903846	8157	1	1.0273
Samd3	4	0.022907	0.057551	0.779994	1182	1	-0.81302	0.58513	0.55733	0.951241	11403	1	0.2948
Clic1	4	0.022912	0.057551	0.779994	1183	3	-0.39977	0.90071	0.89487	1	17480	0	0
Psmd5	4	0.022928	0.057551	0.779994	1184	2	-0.61931	0.90257	0.89713	1	17512	0	0
D630033O11Rik	4	0.022957	0.057551	0.779994	1185	2	-0.67606	0.29161	0.36055	0.897147	7783	1	0.4906
Ccdc57	4	0.022972	0.057551	0.779994	1186	2	-0.53262	0.97876	0.98177	1	19157	0	0
Tbx20	4	0.022989	0.057551	0.779994	1187	2	-0.64831	0.53911	0.53583	0.951241	10741	1	0.2981
Pcdhb13	4	0.023007	0.057551	0.779994	1188	2	-0.6848	0.133	0.16013	0.739719	4250	2	0.4245
Dut	2	0.023044	0.037844	0.779994	1189	2	-1.6393	0.97696	0.98142	1	19115	0	0
Pnpla5	4	0.023067	0.057551	0.779994	1190	2	-0.51197	0.73127	0.71301	1	13988	0	0
Pag1	4	0.023108	0.057551	0.779994	1191	2	-0.65851	0.75382	0.74883	1	14454	0	0
Gtf2i	4	0.023115	0.057551	0.779994	1192	2	-0.64148	0.77478	0.77212	1	14874	0	0
Zfp628	4	0.023137	0.057551	0.779994	1193	3	-0.43995	0.56331	0.54744	0.951241	11094	1	0.29471
Rmi2	4	0.023142	0.057551	0.779994	1194	3	-0.45499	0.99375	0.99387	1	19497	0	0
Il7r	4	0.023158	0.057551	0.779994	1195	2	-0.67149	0.26614	0.32493	0.880145	7197	1	0.50945
Arhgap22	4	0.023259	0.057815	0.779994	1196	1	-0.74223	0.37771	0.43072	0.94913	8727	1	0.48191
Asb6	4	0.023309	0.057816	0.779994	1197	2	-0.4715	0.84087	0.83146	1	16226	0	0
D8Ertd82e	4	0.023316	0.057816	0.779994	1198	2	-0.6118	0.77504	0.77212	1	14880	0	0
Gm13084	4	0.023364	0.058153	0.779994	1199	2	-0.61583	0.98625	0.98851	1	19344	0	0
Cyp2c66	4	0.023367	0.058153	0.779994	1200	3	-0.40426	0.96057	0.96589	1	18774	0	0
Tlr4	4	0.023367	0.058153	0.779994	1201	3	-0.48905	0.97732	0.98095	1	19121	0	0
Sh3tc1	4	0.023432	0.058153	0.779994	1202	3	-0.364	0.2259	0.26192	0.810039	6288	1	0.62837
E130012A19Rik	4	0.023486	0.058153	0.779994	1203	3	-0.40445	0.98062	0.98364	1	19212	0	0
Cndp2	4	0.023496	0.058153	0.779994	1204	2	-0.57947	0.68612	0.65893	0.992077	13053	1	0.21031
Rdm1	4	0.023504	0.058153	0.779994	1205	3	-0.35645	0.10211	0.13112	0.706918	3583	1	0.82555
Psme1	4	0.02356	0.058153	0.779994	1206	2	-0.70064	0.94287	0.94689	1	18362	0	0
Efna4	4	0.023566	0.058153	0.779994	1207	3	-0.52159	0.95342	0.95982	1	18600	0	0
Sulf1	4	0.02361	0.058153	0.779994	1208	2	-0.65698	0.25305	0.3072	0.869364	6888	2	0.22993
Krt31	4	0.023611	0.058153	0.779994	1209	1	-0.73168	0.56939	0.55238	0.951241	11172	1	0.50813
Ccdc18	4	0.023643	0.058153	0.779994	1210	3	-0.36626	0.6569	0.63193	0.988026	12536	1	0.25665
Rtel1	4	0.023645	0.058153	0.779994	1211	2	-1.4591	0.83191	0.82393	1	16054	0	0
Aldh4a1	4	0.023647	0.058153	0.779994	1212	3	-0.53883	0.83656	0.83146	1	16140	0	0
Nlrp9b	4	0.023661	0.058153	0.779994	1213	3	-0.41815	0.42722	0.45538	0.950867	9307	1	0.37601
Olfr1339	4	0.023661	0.058153	0.779994	1214	2	-0.71187	0.96441	0.9687	1	18853	0	0
Ccl26	4	0.023707	0.058487	0.779994	1215	2	-0.54432	0.90941	0.90217	1	17673	0	0
Olfr8	4	0.023711	0.058487	0.779994	1216	2	-0.75132	0.95731	0.96228	1	18688	0	0
Mbd4	4	0.023804	0.058487	0.779994	1217	2	-0.8124	0.4337	0.45701	0.950867	9391	1	0.43977
Fads6	4	0.023805	0.058487	0.779994	1218	3	-0.61524	0.43256	0.45701	0.950867	9375	1	0.4364
4833427G06Rik	4	0.023856	0.058487	0.779994	1219	2	-0.48501	0.97168	0.97547	1	19002	0	0
Upf3a	4	0.023862	0.058487	0.779994	1220	2	-0.55323	0.21114	0.23548	0.773638	5983	2	0.31851
Tex264	4	0.023873	0.058487	0.779994	1221	3	-0.3693	0.91865	0.91673	1	17883	0	0
4932438A13Rik	4	0.023896	0.058487	0.779994	1222	3	-0.34296	0.81157	0.81051	1	15640	0	0
Ube2b	4	0.023912	0.058488	0.779994	1223	2	-0.89666	0.8268	0.8207	1	15955	0	0
Olfr1336	4	0.023932	0.058488	0.779994	1224	3	-0.41361	0.41174	0.44559	0.94913	9114	1	0.30542
Cd300lf	4	0.023962	0.058488	0.779994	1225	3	-0.4401	0.7342	0.71611	1	14044	0	0
Zfp385a	4	0.023987	0.058488	0.779994	1226	3	-0.43735	0.69203	0.66719	0.995374	13171	1	0.24957
Thoc7	4	0.023989	0.058488	0.779994	1227	2	-1.9418	0.18714	0.20982	0.747354	5451	1	1.2831
Paqr8	4	0.024005	0.058488	0.779994	1228	3	-0.39445	0.80772	0.80697	1	15551	0	0
Ccdc60	4	0.024013	0.058488	0.779994	1229	1	-0.70628	0.97966	0.98235	1	19185	0	0
Ppan	2	0.024022	0.038616	0.779994	1230	1	-1.6533	0.44181	0.41583	0.946122	9488	1	0.6283
Lrp10	4	0.024023	0.058488	0.779994	1231	3	-0.35925	0.88894	0.88644	1	17228	0	0
1600015I10Rik	4	0.024063	0.058488	0.779994	1232	1	-1.0546	0.25734	0.31329	0.872746	6981	1	0.47887
Gm3238	4	0.024069	0.058488	0.779994	1233	3	-1.5305	0.94915	0.95524	1	18500	0	0
Vmn1r27	4	0.02411	0.058488	0.779994	1234	3	-0.55301	0.91877	0.91673	1	17886	0	0
Tnrc6c	4	0.024163	0.05909	0.779994	1235	1	-0.91012	0.51358	0.51459	0.951241	10385	1	0.27983
Stpg2	4	0.024196	0.05909	0.779994	1236	3	-0.42074	0.97848	0.98177	1	19152	0	0
Slc25a20	4	0.02421	0.05909	0.779994	1237	3	-0.43326	0.91827	0.91484	1	17873	0	0
Cyp4a29	4	0.024214	0.05909	0.779994	1238	1	-0.79867	0.89569	0.89261	1	17378	0	0
Vmn2r91	4	0.024364	0.05909	0.779994	1239	2	-1.1019	0.93247	0.93225	1	18149	0	0
Fbxo15	4	0.024384	0.05909	0.779994	1240	3	-0.30025	0.8834	0.88246	1	17103	0	0
Vmn1r185	4	0.024398	0.05909	0.779994	1241	2	-0.50139	0.21276	0.23771	0.776117	6015	2	0.30934
Gucy2g	4	0.024407	0.05909	0.779994	1242	2	-0.59203	0.71891	0.69847	0.998699	13708	1	0.16497
Fthl17	4	0.024452	0.059091	0.779994	1243	2	-0.75055	0.97778	0.98136	1	19130	0	0
Smarca4	4	0.02446	0.059091	0.779994	1244	3	-1.4939	0.98871	0.98975	1	19390	0	0
Nthl1	4	0.024465	0.059091	0.779994	1245	1	-0.89921	0.21717	0.24764	0.793576	6097	2	0.26957
Ndufa4l2	4	0.024487	0.059091	0.779994	1246	3	-0.37105	0.82895	0.82178	1	15996	0	0
Olfr787	4	0.024505	0.059091	0.779994	1247	2	-1.4024	0.67313	0.64914	0.991846	12840	1	0.23087
Arid5a	4	0.024515	0.059091	0.779994	1248	1	-1.1176	0.67985	0.65396	0.992077	12942	1	0.22356
Gip	4	0.024565	0.059091	0.779994	1249	1	-1.0288	0.29557	0.36214	0.897808	7875	2	0.2187
Zfp575	4	0.024666	0.059091	0.779994	1250	1	-0.70843	0.85289	0.85159	1	16456	0	0
Ogfod3	4	0.024716	0.059427	0.779994	1251	2	-0.70018	0.87143	0.87173	1	16839	0	0
Serpina3n	4	0.02473	0.059427	0.779994	1252	3	-0.41384	0.32742	0.38642	0.912114	8247	1	0.42327
Hadha	4	0.024753	0.059428	0.779994	1253	3	-0.36099	0.94601	0.95077	1	18435	0	0
C1ra	4	0.024846	0.059692	0.779994	1254	2	-0.63445	0.24124	0.2868	0.846103	6630	1	0.62583
Rspry1	4	0.024853	0.059692	0.779994	1255	3	-0.34277	0.94337	0.94775	1	18372	0	0
Espl1	2	0.024856	0.039622	0.779994	1256	1	-3.8267	0.15111	0.14318	0.721224	4659	1	0.92215
Aprt	4	0.024885	0.059692	0.779994	1257	3	-0.51055	0.51206	0.51459	0.951241	10370	1	0.37561
Fstl3	4	0.024917	0.059692	0.779994	1258	1	-0.81625	0.69604	0.67389	0.998699	13251	1	0.26636
Ubr4	4	0.024929	0.059692	0.779994	1259	3	-0.48534	0.82802	0.82178	1	15979	0	0
Scnn1a	4	0.024939	0.059692	0.779994	1260	3	-0.37695	0.6815	0.65562	0.992077	12969	1	0.16576
Pex10	4	0.024954	0.059692	0.779994	1261	2	-0.64779	0.079811	0.10472	0.650959	3108	2	0.58212
Med30	4	0.024955	0.059692	0.779994	1262	3	-1.692	0.96122	0.96652	1	18789	0	0
Prkaca	4	0.024967	0.059692	0.779994	1263	1	-0.64812	0.11946	0.15234	0.721856	3960	2	0.31947
Tnfsf11	4	0.024976	0.059692	0.779994	1264	3	-0.35739	0.27976	0.34823	0.896426	7519	1	0.43718
Chchd7	4	0.025008	0.059693	0.779994	1265	2	-0.78627	0.91401	0.90834	1	17775	0	0
1700123K08Rik	4	0.025009	0.059693	0.779994	1266	3	-0.37449	0.80177	0.80106	1	15429	0	0
Vmn1r237	4	0.025044	0.059693	0.779994	1267	2	-0.47505	0.81154	0.81051	1	15639	0	0
Olfr1311	4	0.025055	0.059693	0.779994	1268	3	-0.42281	0.31645	0.3766	0.903812	8135	1	0.4849
Ddah2	4	0.025068	0.059693	0.779994	1269	2	-0.75776	0.5791	0.55733	0.951241	11321	1	0.35957
Ulk2	4	0.02508	0.059693	0.779994	1270	2	-0.66326	0.97666	0.98073	1	19106	0	0
Rnf112	4	0.025089	0.059693	0.779994	1271	2	-0.46732	0.62406	0.58519	0.958106	12013	1	0.2861
Slc7a1	4	0.025107	0.059693	0.779994	1272	3	-0.78712	0.93012	0.93011	1	18108	0	0
Ncstn	4	0.025118	0.059693	0.779994	1273	2	-0.51215	0.90935	0.90217	1	17670	0	0
Ryr1	4	0.025135	0.059693	0.779994	1274	2	-0.81252	0.3019	0.37169	0.901147	7988	1	0.42148
Pp2d1	4	0.025153	0.059952	0.779994	1275	2	-0.51081	0.96047	0.96589	1	18771	0	0
Gtsf1	4	0.025166	0.059952	0.779994	1276	2	-0.58828	0.074245	0.1034	0.650959	2984	2	0.50828
Sfr1	4	0.02518	0.059952	0.779994	1277	2	-0.4815	0.98624	0.98837	1	19342	0	0
Esf1	4	0.025268	0.059952	0.779994	1278	3	-1.0947	0.98005	0.98308	1	19198	0	0
Mark4	4	0.025268	0.059952	0.779994	1279	1	-0.85395	0.35754	0.41594	0.946122	8521	1	0.37333
Plekhg3	4	0.025322	0.059952	0.779994	1280	3	-0.45586	0.99541	0.99571	1	19527	0	0
Clvs2	4	0.025339	0.059952	0.779994	1281	3	-0.33035	0.98401	0.98669	1	19295	0	0
Vamp1	4	0.025355	0.059952	0.779994	1282	3	-0.43914	0.81079	0.81051	1	15616	0	0
Olfr794	4	0.02537	0.059952	0.779994	1283	2	-0.47783	0.88659	0.88487	1	17174	0	0
Gk2	4	0.025419	0.060294	0.779994	1284	2	-0.52397	0.6635	0.63772	0.990334	12650	1	0.26448
Sprr2a1	4	0.025435	0.060294	0.779994	1285	3	-0.74678	0.30775	0.37169	0.901147	8055	1	1.0014
Nol10	3	0.02544	0.05166	0.779994	1286	1	-3.1602	0.0064726	0.011661	0.421203	650	2	2.2597
Olfr1084	4	0.025452	0.060555	0.779994	1287	2	-1.0636	0.56877	0.55238	0.951241	11164	1	0.26252
Zbbx	4	0.025454	0.060555	0.779994	1288	3	-0.29337	0.66886	0.64426	0.991846	12766	1	0.25949
Ssr1	4	0.025464	0.060555	0.779994	1289	3	-0.32741	0.79965	0.79859	1	15383	0	0
Adamts18	4	0.025469	0.060555	0.779994	1290	2	-0.50263	0.98671	0.98866	1	19353	0	0
Zfp36l3	4	0.025519	0.060556	0.779994	1291	2	-0.30526	0.64362	0.61796	0.984936	12323	1	0.24728
Fibp	4	0.025534	0.060556	0.779994	1292	3	-0.36444	0.95068	0.95639	1	18540	0	0
Kmt2e	4	0.02557	0.060556	0.779994	1293	2	-0.59203	0.94803	0.95241	1	18482	0	0
Sycp1	4	0.025589	0.060834	0.779994	1294	2	-0.65152	0.99326	0.99341	1	19486	0	0
Crxos	4	0.02562	0.060834	0.779994	1295	2	-0.68303	0.85109	0.84772	1	16418	0	0
Lce3f	4	0.02567	0.060834	0.779994	1296	1	-2.7445	0.14211	0.17449	0.745835	4444	1	0.68252
Cerk	3	0.025704	0.051962	0.779994	1297	2	-0.50689	0.96264	0.96555	1	18814	0	0
Mapkbp1	4	0.025747	0.061125	0.779994	1298	3	-0.31585	0.9914	0.99182	1	19439	0	0
Armc3	4	0.025757	0.061125	0.779994	1299	3	-0.35784	0.62477	0.5852	0.958106	12023	1	0.24331
Kcns2	4	0.025799	0.061126	0.779994	1300	2	-0.50988	0.97867	0.98177	1	19155	0	0
Pou2f1	4	0.025821	0.061382	0.779994	1301	1	-1.2834	0.18986	0.21506	0.747354	5512	2	0.32632
Gm5549	4	0.025823	0.061382	0.779994	1302	3	-0.31795	0.83869	0.83146	1	16185	0	0
Fam120b	4	0.025871	0.061382	0.779994	1303	2	-0.45025	0.1023	0.13112	0.706918	3586	1	0.69619
Riiad1	4	0.025899	0.061383	0.779994	1304	2	-0.79551	0.67919	0.65239	0.992077	12929	1	0.24089
Ptgir	4	0.025921	0.061383	0.779994	1305	2	-0.69575	0.69824	0.67887	0.998699	13295	1	0.22282
Med9	3	0.02593	0.051962	0.779994	1306	1	-1.1994	0.35484	0.35891	0.897147	8500	1	0.43701
Dpf1	4	0.025936	0.061383	0.779994	1307	2	-0.52414	0.54699	0.54242	0.951241	10851	1	0.34318
Gne	4	0.025957	0.061383	0.779994	1308	3	-0.47534	0.93897	0.94233	1	18285	0	0
Vmn1r67	4	0.025971	0.061383	0.779994	1309	2	-0.5447	0.81687	0.81509	1	15758	0	0
Krt13	4	0.026019	0.061667	0.779994	1310	3	-0.29117	0.23573	0.27883	0.838057	6509	1	0.9633
Ankrd10	4	0.026021	0.061667	0.779994	1311	2	-0.52785	0.80635	0.80582	1	15523	0	0
Pnkp	2	0.026094	0.04289	0.779994	1312	1	-1.3267	0.32403	0.30406	0.869364	8205	1	1.0485
1700122O11Rik	4	0.026101	0.061667	0.779994	1313	2	-0.57015	0.41671	0.44724	0.94913	9176	1	0.38017
Dcaf12l2	4	0.026111	0.061667	0.779994	1314	2	-0.55639	0.91607	0.91228	1	17820	0	0
Olfr297	4	0.026122	0.061667	0.779994	1315	1	-0.81878	0.50348	0.51131	0.951241	10250	1	0.49824
Krtap5-4	3	0.026136	0.052278	0.779994	1316	2	-1.4277	0.89746	0.90522	1	17424	0	0
Nle1	3	0.026136	0.052278	0.779994	1317	2	-1.8307	0.82926	0.82002	1	16002	0	0
Cnr1	4	0.026161	0.061667	0.779994	1318	2	-0.57013	0.68801	0.66057	0.992422	13088	1	0.27731
Atp6v0a1	4	0.026172	0.061667	0.779994	1319	1	-0.85042	0.51116	0.51459	0.951241	10357	1	0.3598
Dlgap5	4	0.026201	0.061667	0.779994	1320	3	-0.52141	0.38681	0.43403	0.94913	8825	1	0.41014
Olfr18	4	0.026223	0.061667	0.779994	1321	3	-0.37663	0.69967	0.67887	0.998699	13318	1	0.20384
Fmnl1	4	0.02623	0.061667	0.779994	1322	3	-0.45976	0.9814	0.98417	1	19226	0	0
Yif1a	4	0.02623	0.061667	0.779994	1323	2	-0.53316	0.89228	0.88802	1	17302	0	0
Vmn1r1	4	0.026256	0.061667	0.779994	1324	3	-0.34681	0.48086	0.48989	0.951241	9962	1	0.29821
Rnf222	4	0.026272	0.061667	0.779994	1325	2	-0.7451	0.14998	0.18018	0.745835	4626	2	0.43463
Prpf40b	4	0.026273	0.061667	0.779994	1326	3	-0.34214	0.86153	0.86201	1	16634	0	0
Gm6460	4	0.026286	0.061667	0.779994	1327	2	-2.4552	0.61155	0.57198	0.951241	11813	1	0.94682
Krt6a	4	0.02636	0.061667	0.779994	1328	3	-0.40519	0.98327	0.98571	1	19275	0	0
Usp4	4	0.026372	0.061667	0.779994	1329	1	-0.67418	0.42658	0.45538	0.950867	9300	1	0.36088
Proser3	4	0.026413	0.061667	0.779994	1330	3	-0.41593	0.90171	0.89638	1	17498	0	0
Tnk1	4	0.026422	0.061667	0.779994	1331	3	-0.35545	0.61802	0.57868	0.951241	11917	1	0.24853
Gsto2	4	0.026423	0.061667	0.779994	1332	1	-0.78992	0.268	0.33176	0.886438	7240	1	0.52837
Rint1	4	0.026473	0.061667	0.779994	1333	1	-2.874	0.049247	0.067791	0.594075	2211	2	1.1674
C87499	4	0.0265	0.061667	0.779994	1334	3	-0.44824	0.48255	0.48989	0.951241	9977	1	0.29774
1810013L24Rik	4	0.026523	0.061667	0.779994	1335	2	-1.9214	0.79785	0.79492	1	15348	0	0
C1qtnf2	4	0.026546	0.061667	0.779994	1336	3	-0.3468	0.36866	0.42077	0.94913	8642	1	0.45462
Stra8	4	0.026563	0.061667	0.779994	1337	3	-0.29427	0.76931	0.75991	1	14772	0	0
Cbln3	4	0.026592	0.061667	0.779994	1338	3	-0.40691	0.50374	0.51131	0.951241	10253	1	0.38942
Trpv5	4	0.026623	0.061667	0.779994	1339	1	-0.78415	0.9534	0.95982	1	18598	0	0
Hip1	4	0.026637	0.061667	0.779994	1340	2	-0.55707	0.81323	0.8128	1	15676	0	0
Tlcd2	4	0.026665	0.061667	0.779994	1341	2	-0.56765	0.18963	0.21506	0.747354	5508	1	0.52443
Polr1d	4	0.026673	0.061667	0.779994	1342	2	-1.8976	0.027989	0.035033	0.467595	1453	2	1.8527
Znrf1	4	0.026698	0.061667	0.779994	1343	3	-0.51284	0.7445	0.72837	1	14257	0	0
Mllt6	4	0.026716	0.061667	0.779994	1344	2	-0.52082	0.59009	0.55896	0.951241	11482	1	0.24451
G6pc3	4	0.026718	0.061667	0.779994	1345	3	-0.42885	0.97813	0.98156	1	19141	0	0
Aph1c	4	0.026724	0.061667	0.779994	1346	2	-0.68821	0.82716	0.8207	1	15963	0	0
Gm4894	4	0.026732	0.061667	0.779994	1347	3	-0.34383	0.99061	0.99123	1	19428	0	0
Gm6588	4	0.026786	0.061667	0.779994	1348	3	-0.51639	0.96965	0.97266	1	18958	0	0
Ptdss1	4	0.026795	0.061667	0.779994	1349	2	-1.9016	0.41681	0.44724	0.94913	9178	1	0.86413
Cirh1a	4	0.026795	0.061667	0.779994	1350	3	-2.1943	0.99307	0.99333	1	19484	0	0
Chst15	4	0.026854	0.061667	0.779994	1351	3	-0.31079	0.92137	0.92093	1	17946	0	0
Gpr179	4	0.026874	0.061667	0.779994	1352	3	-0.71582	0.73474	0.71768	1	14057	0	0
Tspyl2	4	0.026924	0.061667	0.779994	1353	1	-0.72223	0.087533	0.11478	0.677735	3277	2	0.45992
Rdh12	4	0.026944	0.061942	0.779994	1354	2	-0.57509	0.75506	0.75169	1	14485	0	0
Med13l	4	0.026976	0.062215	0.779994	1355	3	-0.42801	0.72389	0.70501	0.998699	13826	0	0
Stx8	4	0.026986	0.062215	0.779994	1356	3	-0.52462	0.73266	0.7146	1	14012	0	0
Loxhd1	4	0.02701	0.062215	0.779994	1357	2	-0.50104	0.76268	0.7558	1	14635	0	0
1700026L06Rik	4	0.027024	0.062215	0.779994	1358	1	-0.71764	0.75284	0.74741	1	14435	0	0
Il22	4	0.02704	0.062215	0.779994	1359	3	-0.45573	0.57212	0.55733	0.951241	11209	1	0.3621
Rbm6	4	0.027074	0.062215	0.779994	1360	1	-0.79167	0.72812	0.70823	0.998699	13922	0	0
Srp19	2	0.027174	0.04376	0.779994	1361	2	-1.0394	0.97283	0.97685	1	19027	0	0
Usp46	4	0.027187	0.062215	0.779994	1362	3	-0.40931	0.73492	0.71768	1	14062	0	0
Plrg1	4	0.027211	0.062215	0.779994	1363	2	-1.9422	0.0022337	0.0058502	0.3003	380	2	2.0907
Slc4a5	4	0.027225	0.062215	0.779994	1364	2	-0.49347	0.048137	0.065037	0.579085	2173	2	0.65137
Olfr1126	4	0.027225	0.062215	0.779994	1365	3	-0.55833	0.98535	0.98777	1	19319	0	0
Tusc2	4	0.027241	0.062215	0.779994	1366	3	-0.47323	0.42877	0.45538	0.950867	9327	1	0.29945
Commd4	3	0.02725	0.055653	0.779994	1367	1	-3.0277	0.46342	0.44173	0.94913	9756	1	0.53914
Ctsm	4	0.027258	0.062215	0.779994	1368	3	-0.53217	0.33273	0.38806	0.914344	8296	1	0.37069
Gpr171	4	0.027275	0.062215	0.779994	1369	2	-0.59371	0.93297	0.93387	1	18162	0	0
Cdk7	4	0.0273	0.062215	0.779994	1370	2	-2.2803	0.0096881	0.018085	0.421203	787	1	3.1021
Agpat2	4	0.027315	0.062215	0.779994	1371	3	-0.56137	0.78254	0.77987	1	15038	0	0
Mark2	4	0.027375	0.062215	0.779994	1372	3	-0.34612	0.83232	0.82502	1	16067	0	0
Vwa3a	4	0.027428	0.062215	0.779994	1373	3	-0.38988	0.46819	0.48162	0.951241	9820	1	1.1734
Glo1	4	0.027431	0.062215	0.779994	1374	3	-0.71931	0.61064	0.57198	0.951241	11797	1	0.28203
Xlr4a	4	0.027478	0.062215	0.779994	1375	2	-1.0864	0.6931	0.66884	0.996627	13199	1	0.15725
Gbp4	4	0.027576	0.062215	0.779994	1376	2	-0.67511	0.8928	0.88956	1	17315	0	0
Erp44	4	0.027626	0.062215	0.779994	1377	3	-0.53643	0.74974	0.74022	1	14374	0	0
Tex10	4	0.027657	0.062215	0.779994	1378	2	-1.5093	0.61614	0.57868	0.951241	11886	1	0.40759
Zfp647	4	0.027668	0.062215	0.779994	1379	3	-0.48509	0.60048	0.56714	0.951241	11638	1	0.33704
Sdc3	4	0.027676	0.062215	0.779994	1380	3	-0.38622	0.38883	0.43568	0.94913	8848	1	0.40355
Zfp354a	4	0.02771	0.062507	0.779994	1381	3	-0.29283	0.94615	0.95077	1	18441	0	0
8430408G22Rik	4	0.027726	0.062507	0.779994	1382	1	-0.86636	0.4999	0.51131	0.951241	10209	1	0.35138
Slc29a1	4	0.027775	0.062507	0.779994	1383	3	-0.44956	0.23598	0.27883	0.838057	6516	1	0.52987
Trim33	4	0.027813	0.062507	0.779994	1384	2	-0.56743	0.93352	0.93387	1	18171	0	0
Ubb	4	0.027822	0.062507	0.779994	1385	3	-1.6848	0.99252	0.99274	1	19469	0	0
Acyp2	4	0.027822	0.062507	0.779994	1386	3	-0.4231	0.98632	0.98866	1	19347	0	0
Gm5615	4	0.027826	0.062507	0.779994	1387	2	-0.48349	0.92178	0.92153	1	17952	0	0
Adgb	4	0.027837	0.062507	0.779994	1388	2	-0.51821	0.21802	0.24764	0.793576	6116	2	0.28526
Hydin	4	0.027876	0.062507	0.779994	1389	2	-0.56532	0.23473	0.27691	0.837045	6486	2	0.34127
Rnf123	4	0.027922	0.062799	0.779994	1390	2	-0.72831	0.82638	0.8207	1	15948	0	0
Dbpht2	2	0.027974	0.045522	0.779994	1391	1	-3.7335	0.69111	0.67983	0.998699	13157	0	0
Afap1l2	4	0.027977	0.062799	0.779994	1392	1	-0.73343	0.97273	0.97669	1	19024	0	0
Ap4e1	4	0.02801	0.062799	0.779994	1393	3	-0.53501	0.45454	0.47173	0.951241	9653	1	0.43122
Rbl2	4	0.028075	0.062799	0.779994	1394	3	-0.33498	0.54549	0.5408	0.951241	10836	1	0.28145
Cyp2c54	4	0.028077	0.062799	0.779994	1395	1	-0.78015	0.031778	0.038594	0.479929	1575	1	1.726
Dnal1	4	0.028103	0.062799	0.779994	1396	2	-0.51062	0.14853	0.17925	0.745835	4593	1	1.0139
Nusap1	4	0.028155	0.062799	0.779994	1397	2	-1.0963	0.68554	0.65893	0.992077	13044	1	0.26069
Pxylp1	4	0.028195	0.063086	0.779994	1398	3	-0.44782	0.18928	0.21506	0.747354	5499	1	0.59206
Gan	4	0.028225	0.063086	0.779994	1399	3	-0.36502	0.66047	0.63443	0.988026	12598	1	0.19934
Vegfb	4	0.028227	0.063086	0.779994	1400	1	-0.58022	0.081685	0.10536	0.650959	3148	1	0.83088
Vmn1r128	1	0.028243	0.017069	0.676524	1401	1	-3.2018	0.97176	0.98293	1	19005	0	0
Ckmt1	4	0.028245	0.063086	0.779994	1402	3	-0.36126	0.47747	0.48989	0.951241	9924	1	0.37078
Fcgbp	4	0.028255	0.063086	0.779994	1403	2	-0.63546	0.90497	0.89788	1	17562	0	0
Abhd8	4	0.028276	0.063086	0.779994	1404	3	-0.45517	0.60768	0.57039	0.951241	11751	1	0.22239
Rabep1	4	0.028277	0.063086	0.779994	1405	1	-0.66102	0.88955	0.88723	1	17242	0	0
Sema3e	4	0.028312	0.063087	0.779994	1406	2	-0.48344	0.91013	0.90217	1	17693	0	0
Snip1	4	0.028377	0.063087	0.779994	1407	1	-3.2593	0.76673	0.75721	1	14718	0	0
Slc7a8	4	0.028417	0.06346	0.779994	1408	3	-0.3976	0.95186	0.95678	1	18564	0	0
Slmo1	4	0.028446	0.06346	0.779994	1409	2	-0.43846	0.4941	0.5047	0.951241	10133	1	0.30831
Fmo2	4	0.028477	0.06346	0.779994	1410	1	-0.95903	0.04635	0.063795	0.579085	2088	3	0.40103
Tekt5	4	0.028594	0.06346	0.779994	1411	3	-0.32742	0.93448	0.93594	1	18196	0	0
Ttc4	3	0.028606	0.05663	0.779994	1412	1	-2.5294	0.051686	0.060143	0.574265	2319	2	1.2198
Klhdc9	4	0.028647	0.06346	0.779994	1413	2	-0.43446	0.71366	0.6968	0.998699	13603	1	0.21782
BC048507	4	0.028678	0.06346	0.779994	1414	2	-0.80693	0.0085384	0.017165	0.421203	740	2	1.1633
Tlr8	4	0.028685	0.06346	0.779994	1415	3	-0.33581	0.80695	0.80697	1	15535	0	0
Rsph9	4	0.028728	0.06346	0.779994	1416	1	-0.62742	0.98441	0.98715	1	19303	0	0
Olfr76	4	0.028736	0.06346	0.779994	1417	3	-0.32232	0.90499	0.89788	1	17563	0	0
Ptp4a1	4	0.028778	0.06346	0.779994	1418	1	-3.2501	0.10343	0.13344	0.706918	3609	1	0.67197
Rbpms	4	0.028799	0.06346	0.779994	1419	3	-0.35395	0.99231	0.99264	1	19463	0	0
Tgfb1i1	4	0.028828	0.06346	0.779994	1420	2	-0.52413	0.68871	0.66057	0.992422	13102	1	0.23453
Cyp11b1	4	0.028861	0.06346	0.779994	1421	3	-0.36571	0.3176	0.3766	0.903812	8146	1	0.50108
Amigo2	4	0.028878	0.06346	0.779994	1422	1	-0.9975	0.49931	0.51131	0.951241	10200	1	0.34116
4930402H24Rik	4	0.028887	0.063778	0.779994	1423	3	-0.45911	0.98153	0.98417	1	19233	0	0
Oxr1	4	0.028906	0.063778	0.779994	1424	2	-0.60228	0.056245	0.080687	0.63631	2467	2	0.4544
Ntn5	4	0.028928	0.064089	0.779994	1425	1	-0.85276	0.062636	0.094614	0.650959	2711	2	0.39563
Zfp938	4	0.028935	0.064089	0.779994	1426	2	-0.57044	0.93494	0.93739	1	18203	0	0
Clic4	4	0.02897	0.064089	0.779994	1427	3	-0.38846	0.97855	0.98177	1	19154	0	0
Clstn3	4	0.028978	0.064089	0.779994	1428	3	-0.43748	0.81506	0.81509	1	15718	0	0
Slpi	4	0.028993	0.064396	0.779994	1429	2	-0.58302	0.68226	0.65724	0.992077	12980	1	0.17691
Calb1	4	0.029016	0.064396	0.779994	1430	3	-0.45583	0.9937	0.99378	1	19496	0	0
Gm21541	4	0.029028	0.064396	0.779994	1431	2	-1.6947	0.39748	0.44061	0.94913	8945	1	0.77299
Fam105a	4	0.02906	0.064396	0.779994	1432	3	-0.3868	0.98994	0.99098	1	19415	0	0
Rbm8a	4	0.029078	0.064396	0.779994	1433	1	-2.1294	0.21856	0.2496	0.799481	6128	1	1.5977
Hsd17b12	4	0.029089	0.064396	0.779994	1434	2	-1.1716	0.060012	0.089361	0.650959	2602	1	2.1426
Cypt1	4	0.029113	0.064396	0.779994	1435	2	-0.65396	0.98497	0.98747	1	19312	0	0
Cyp11b2	4	0.029119	0.064396	0.779994	1436	3	-0.43343	0.5131	0.51459	0.951241	10381	1	0.30639
Chst9	4	0.029128	0.064396	0.779994	1437	2	-0.63006	0.8391	0.83146	1	16190	0	0
Ak4	4	0.029128	0.064396	0.779994	1438	1	-0.96107	0.97134	0.97522	1	18992	0	0
Cntn1	4	0.029157	0.064739	0.779994	1439	2	-0.48792	0.21127	0.23659	0.774715	5985	1	0.58564
Ugp2	4	0.029178	0.064739	0.779994	1440	2	-1.892	0.1098	0.13983	0.713923	3743	1	1.7697
Gng3	4	0.029228	0.06537	0.779994	1441	1	-0.78009	0.94058	0.94371	1	18309	0	0
Ap1m1	4	0.029252	0.06537	0.779994	1442	3	-1.1279	0.18046	0.20569	0.747354	5306	1	1.6928
Ppef1	4	0.029263	0.06537	0.779994	1443	2	-0.63607	0.87426	0.8726	1	16897	0	0
Olfr1349	4	0.029278	0.06537	0.779994	1444	1	-0.75287	0.15382	0.18317	0.745835	4717	1	0.6272
Lrrc7	4	0.029298	0.06537	0.779994	1445	3	-0.4526	0.98293	0.98538	1	19267	0	0
Alox15	4	0.029302	0.065371	0.779994	1446	2	-0.62238	0.81516	0.81509	1	15719	0	0
Tat	4	0.029319	0.065371	0.779994	1447	3	-0.2957	0.987	0.98866	1	19359	0	0
Acvr1b	4	0.02936	0.065371	0.779994	1448	2	-0.48125	0.27229	0.33558	0.88814	7333	1	0.45619
Pofut1	4	0.029379	0.065691	0.779994	1449	1	-0.67307	0.75095	0.74454	1	14400	0	0
Rnase2a	4	0.029401	0.065691	0.779994	1450	3	-0.38183	0.99017	0.99098	1	19420	0	0
6330408A02Rik	4	0.029429	0.065691	0.779994	1451	1	-1.1386	0.88771	0.88644	1	17204	0	0
Lmod2	4	0.029432	0.065691	0.779994	1452	3	-0.34825	0.50765	0.51296	0.951241	10306	1	0.31391
Ncapd2	4	0.029479	0.065691	0.779994	1453	1	-1.5518	0.72231	0.70175	0.998699	13790	0	0
Fndc8	4	0.029572	0.065691	0.779994	1454	3	-0.29741	0.55147	0.54408	0.951241	10912	1	0.39218
Ppp2r2b	4	0.029579	0.065691	0.779994	1455	2	-0.49866	0.30592	0.37169	0.901147	8034	1	0.61681
Tmprss11b	4	0.029593	0.065691	0.779994	1456	2	-0.52042	0.62705	0.59342	0.967226	12062	1	0.2724
Mal2	4	0.029629	0.065691	0.779994	1457	2	-0.62216	0.57403	0.55733	0.951241	11238	1	0.33731
Itga9	4	0.029632	0.065691	0.779994	1458	2	-0.60501	0.83356	0.82613	1	16089	0	0
Tlr7	4	0.029665	0.065691	0.779994	1459	3	-0.37098	0.87924	0.87429	1	17009	0	0
Wnt6	4	0.029679	0.065691	0.779994	1460	1	-0.70609	0.37768	0.43072	0.94913	8726	1	0.36071
Tmem45b	4	0.029681	0.065691	0.779994	1461	2	-0.68802	0.92609	0.92675	1	18029	0	0
Olfr362	4	0.029696	0.065692	0.779994	1462	3	-0.30428	0.98574	0.98793	1	19324	0	0
Olfr728	4	0.029729	0.065692	0.779994	1463	2	-0.59742	0.98081	0.98382	1	19215	0	0
Skint11	4	0.029827	0.065692	0.779994	1464	2	-0.86435	0.79467	0.79	1	15288	0	0
Pla2g12a	4	0.029846	0.065692	0.779994	1465	2	-0.56041	0.16026	0.18539	0.745835	4844	1	0.65472
Mesp2	4	0.02987	0.065692	0.779994	1466	3	-0.31246	0.89695	0.89261	1	17408	0	0
Fmod	4	0.02987	0.065692	0.779994	1467	3	-0.47689	0.14083	0.17361	0.745835	4413	1	0.70716
4930562C15Rik	4	0.029879	0.065692	0.779994	1468	3	-0.65282	0.60189	0.56714	0.951241	11662	1	0.34436
Spic	4	0.029929	0.065692	0.779994	1469	1	-0.65476	0.78689	0.78249	1	15133	0	0
Snx13	4	0.02993	0.065692	0.779994	1470	3	-0.39528	0.99428	0.99447	1	19504	0	0
Pak3	4	0.029946	0.065692	0.779994	1471	3	-0.41294	0.52305	0.526	0.951241	10510	1	0.30122
Rabgap1l	4	0.029964	0.065692	0.779994	1472	2	-0.72568	0.92307	0.9239	1	17974	0	0
Rsph3a	4	0.029979	0.065692	0.779994	1473	1	-0.91747	0.45768	0.47334	0.951241	9693	1	0.40548
Plscr4	4	0.030029	0.06601	0.779994	1474	2	-0.74334	0.42008	0.44724	0.94913	9213	1	0.44057
Olfr635	4	0.030071	0.06601	0.779994	1475	3	-0.33622	0.88697	0.88487	1	17187	0	0
Mfi2	4	0.030076	0.06601	0.779994	1476	3	-0.43955	0.8736	0.87259	1	16879	0	0
Ly6k	4	0.030079	0.06601	0.779994	1477	2	-0.53091	0.65327	0.63111	0.988026	12470	1	0.2667
Kctd15	4	0.030101	0.06601	0.779994	1478	2	-0.43998	0.75994	0.75443	1	14583	0	0
Gm6121	3	0.030111	0.057299	0.779994	1479	1	-0.65547	0.83208	0.82289	1	16061	0	0
1700019L03Rik	4	0.03012	0.06601	0.779994	1480	2	-0.57947	0.38549	0.43402	0.94913	8811	1	0.41845
Prkcdbp	4	0.030129	0.06601	0.779994	1481	3	-0.32483	0.9559	0.9616	1	18658	0	0
Acad11	4	0.030129	0.06601	0.779994	1482	1	-0.76239	0.2191	0.25076	0.80018	6140	2	0.28568
Rasd2	4	0.030165	0.06601	0.779994	1483	3	-0.44474	0.91165	0.9043	1	17726	0	0
Olfr1380	3	0.030186	0.057299	0.779994	1484	1	-0.71779	0.27953	0.29898	0.864887	7513	1	0.80323
Gpr84	4	0.030207	0.066011	0.779994	1485	3	-0.3031	0.73006	0.70823	0.998699	13963	0	0
Cdk19	4	0.030258	0.066011	0.779994	1486	2	-0.55493	0.34074	0.39785	0.926534	8363	1	0.57855
Ccdc36	4	0.030351	0.066323	0.779994	1487	3	-0.34839	0.73462	0.71768	1	14054	0	0
Gc	4	0.030359	0.066323	0.779994	1488	3	-0.31931	0.79457	0.79	1	15286	0	0
Emc8	4	0.030379	0.066323	0.779994	1489	1	-0.9432	0.17919	0.20569	0.747354	5276	2	0.41965
Sms	4	0.030417	0.066323	0.779994	1490	3	-0.37764	0.22009	0.25436	0.806177	6163	1	0.45175
Chsy3	4	0.030422	0.066323	0.779994	1491	3	-0.31626	0.96933	0.97266	1	18951	0	0
Olfr304	4	0.030429	0.066323	0.779994	1492	1	-0.89374	0.65597	0.63111	0.988026	12523	1	0.20223
Tmem132d	4	0.030445	0.066323	0.779994	1493	2	-0.50358	0.7371	0.72076	1	14110	0	0
Scn2a1	4	0.030496	0.066323	0.779994	1494	3	-0.56545	0.83671	0.83146	1	16142	0	0
Gm13154	4	0.030529	0.066323	0.779994	1495	2	-1.792	0.41551	0.4456	0.94913	9162	1	0.32209
Nipa1	4	0.030553	0.066323	0.779994	1496	2	-0.49871	0.30171	0.37169	0.901147	7984	1	0.51635
Spink6	4	0.030563	0.066323	0.779994	1497	2	-0.42426	0.27874	0.34692	0.896426	7494	2	0.24339
Tmem258	4	0.030565	0.066323	0.779994	1498	3	-1.0463	0.024264	0.032248	0.465683	1327	1	1.9678
Ammecr1l	4	0.030583	0.066324	0.779994	1499	2	-0.49872	0.55403	0.54744	0.951241	10952	1	0.35589
Mki67	4	0.030629	0.066324	0.779994	1500	1	-0.73567	0.93525	0.93739	1	18210	0	0
Cep170	4	0.030708	0.066324	0.779994	1501	3	-0.30698	0.87753	0.87342	1	16975	0	0
Irak1	4	0.030729	0.066324	0.779994	1502	2	-0.5454	0.74197	0.72684	1	14207	0	0
Olfr330	4	0.03075	0.066324	0.779994	1503	3	-0.42973	0.95043	0.95602	1	18533	0	0
Abcg4	4	0.030751	0.066324	0.779994	1504	2	-0.51312	0.55894	0.54744	0.951241	11030	1	0.25667
Gpr75	4	0.030814	0.067038	0.779994	1505	3	-0.44748	0.68695	0.65893	0.992077	13072	1	0.17635
Tas2r103	4	0.030822	0.067038	0.779994	1506	3	-0.95297	0.92993	0.93011	1	18105	0	0
Olfr157	4	0.030825	0.067038	0.779994	1507	2	-0.74115	0.60579	0.56873	0.951241	11724	1	0.28619
Sgol1	4	0.030829	0.067038	0.779994	1508	1	-1.6331	0.2617	0.3188	0.872746	7099	2	0.39882
Olfr389	4	0.030835	0.067038	0.779994	1509	3	-0.32283	0.501	0.51131	0.951241	10221	1	0.32752
Dhx29	4	0.030846	0.067038	0.779994	1510	3	-0.52864	0.98515	0.98747	1	19316	0	0
Fam65a	4	0.030879	0.067038	0.779994	1511	1	-0.63536	0.26093	0.3188	0.872746	7081	1	0.42017
Kank2	4	0.030929	0.067038	0.779994	1512	1	-0.70697	0.587	0.55896	0.951241	11430	1	0.30421
Postn	4	0.030973	0.067038	0.779994	1513	3	-0.47651	0.97807	0.98156	1	19140	0	0
Arfrp1	4	0.030984	0.067398	0.779994	1514	3	-1.3644	0.9527	0.9587	1	18583	0	0
Ubl3	4	0.031008	0.067398	0.779994	1515	3	-0.36215	0.57333	0.55733	0.951241	11230	1	0.27113
Cxcr2	4	0.031029	0.067398	0.779994	1516	2	-0.58388	0.94586	0.95034	1	18429	0	0
Coro1b	4	0.031079	0.067399	0.779994	1517	1	-1.3417	0.88499	0.88327	1	17143	0	0
Inadl	4	0.03109	0.067399	0.779994	1518	3	-0.43042	0.96777	0.971	1	18924	0	0
Cyp4f37	4	0.031129	0.067757	0.779994	1519	1	-0.9777	0.74511	0.72987	1	14271	0	0
Olfr125	4	0.031187	0.067757	0.779994	1520	3	-0.55065	0.78586	0.78118	1	15115	0	0
Zfp637	4	0.031217	0.067757	0.779994	1521	2	-0.4413	0.28957	0.35924	0.897147	7736	2	0.22562
Ncoa4	4	0.031227	0.067757	0.779994	1522	2	-0.69252	0.97475	0.979	1	19064	0	0
Pnpla2	4	0.031229	0.067757	0.779994	1523	2	-0.59151	0.75227	0.74598	1	14425	0	0
Zfand1	4	0.031261	0.068144	0.779994	1524	3	-0.50762	0.98288	0.98538	1	19263	0	0
Tex101	4	0.031267	0.068144	0.779994	1525	2	-0.46793	0.61972	0.57868	0.951241	11946	1	0.24756
Atg14	4	0.031279	0.068144	0.779994	1526	2	-0.87618	0.52808	0.52926	0.951241	10578	1	0.43632
Prl7a1	4	0.031353	0.068144	0.779994	1527	3	-0.27528	0.94047	0.94371	1	18308	0	0
Olfr1423	4	0.031369	0.068145	0.779994	1528	3	-0.36634	0.68704	0.65893	0.992077	13074	1	0.24667
Pik3ap1	4	0.031379	0.068145	0.779994	1529	1	-1.2497	0.28674	0.35393	0.897147	7678	2	0.22822
Scml2	4	0.031385	0.068145	0.779994	1530	3	-0.35448	0.90857	0.90148	1	17650	0	0
Tmem74b	4	0.031433	0.068145	0.779994	1531	3	-0.40471	0.97342	0.97788	1	19037	0	0
Vmn1r131	1	0.031467	0.017069	0.676524	1532	1	-2.1492	0.96853	0.98293	1	18940	0	0
Lrrtm3	4	0.031476	0.068469	0.779994	1533	3	-1.3962	0.99388	0.99397	1	19501	0	0
Dcstamp	4	0.031479	0.068469	0.779994	1534	1	-0.98117	0.069381	0.10146	0.650959	2878	2	0.54091
H1foo	4	0.031529	0.068469	0.779994	1535	2	-0.59734	0.91618	0.91228	1	17822	0	0
Vmn2r120	4	0.031536	0.068469	0.779994	1536	2	-0.58277	0.74721	0.73447	1	14320	0	0
Uty	4	0.031546	0.068469	0.779994	1537	3	-0.33465	0.64574	0.62123	0.985661	12362	1	0.18238
Sva	4	0.031556	0.06847	0.779994	1538	2	-0.66192	0.24311	0.28919	0.848567	6671	1	0.59201
Slc8b1	4	0.031579	0.06847	0.779994	1539	1	-1.1044	0.4651	0.47829	0.951241	9779	1	0.35236
Ccl4	4	0.031594	0.06847	0.779994	1540	3	-0.3403	0.41132	0.44559	0.94913	9110	1	0.46416
Diap2	4	0.031606	0.06847	0.779994	1541	2	-0.60449	0.58517	0.55733	0.951241	11404	1	0.30519
Ciao1	2	0.031629	0.053164	0.779994	1542	1	-2.6983	0.87264	0.88428	1	16862	0	0
Elmod1	4	0.031654	0.071563	0.779994	1543	3	-0.40653	0.98155	0.98417	1	19234	0	0
4933405L10Rik	4	0.031665	0.071563	0.779994	1544	3	-0.46208	0.88354	0.88246	1	17105	0	0
Aspn	4	0.031679	0.071563	0.779994	1545	1	-0.76878	0.51933	0.51945	0.951241	10460	1	0.31109
Ttc16	4	0.031708	0.071563	0.779994	1546	3	-0.41451	0.98961	0.99051	1	19409	0	0
Nrip2	4	0.031717	0.071563	0.779994	1547	2	-0.70774	0.69217	0.66719	0.995374	13177	1	0.21471
Adgrb3	4	0.031729	0.071563	0.779994	1548	1	-0.76075	0.1141	0.14137	0.713923	3840	2	0.39044
Tcp11l1	4	0.031746	0.071563	0.779994	1549	3	-0.26051	0.97557	0.97986	1	19084	0	0
Neurod4	4	0.031751	0.071563	0.779994	1550	3	-0.42127	0.99039	0.9911	1	19425	0	0
Pak6	4	0.031778	0.071563	0.779994	1551	1	-1.0057	0.90944	0.90217	1	17674	0	0
Junb	4	0.031797	0.071563	0.779994	1552	3	-0.31168	0.71628	0.6968	0.998699	13654	1	0.19078
Tctn3	4	0.031813	0.071563	0.779994	1553	3	-0.37136	0.99222	0.99256	1	19459	0	0
Itfg1	4	0.031821	0.071563	0.779994	1554	3	-0.47292	0.80563	0.80582	1	15511	0	0
Parp10	4	0.031829	0.071564	0.779994	1555	3	-0.41101	0.86288	0.86201	1	16663	0	0
Slc35b1	4	0.031837	0.071564	0.779994	1556	2	-1.4104	0.37412	0.42737	0.94913	8688	1	1.3115
Uxt	4	0.031837	0.071564	0.779994	1557	2	-2.2192	0.040019	0.054546	0.562634	1864	1	2.3392
Dynlrb1	4	0.031848	0.071564	0.779994	1558	3	-0.47739	0.9949	0.99501	1	19513	0	0
Nckap5	4	0.031875	0.071564	0.779994	1559	3	-0.38744	0.94869	0.95446	1	18495	0	0
Otx1	4	0.031878	0.071564	0.779994	1560	2	-0.69882	0.87083	0.87173	1	16829	0	0
Als2cr12	4	0.031903	0.071564	0.779994	1561	3	-0.29112	0.84284	0.83765	1	16264	0	0
Lrrc66	4	0.031907	0.071564	0.779994	1562	2	-0.52394	0.57728	0.55733	0.951241	11294	1	0.28102
Cep95	4	0.031928	0.071564	0.779994	1563	2	-0.59127	0.23807	0.28377	0.843829	6557	1	0.48022
Nudt19	4	0.031957	0.071564	0.779994	1564	3	-0.35617	0.60432	0.56714	0.951241	11698	1	0.3471
Nkpd1	4	0.031962	0.071564	0.779994	1565	3	-0.39133	0.4138	0.4456	0.94913	9137	1	0.39521
Hist1h4d	2	0.031998	0.053791	0.779994	1566	2	-0.97603	0.968	0.96959	1	18926	0	0
Abhd6	4	0.032003	0.071564	0.779994	1567	1	-4.1282	0.85119	0.84772	1	16420	0	0
Ugt2a3	4	0.032043	0.071898	0.779994	1568	3	-0.42326	0.99375	0.99387	1	19498	0	0
Ccdc155	4	0.03212	0.071899	0.779994	1569	3	-0.31815	0.84985	0.84475	1	16396	0	0
Hgd	4	0.032128	0.071899	0.779994	1570	2	-0.71625	0.84348	0.83765	1	16276	0	0
Adra1b	4	0.032178	0.072658	0.779994	1571	1	-0.69475	0.061306	0.092297	0.650959	2649	2	0.55388
Ctdp1	4	0.032228	0.072658	0.779994	1572	1	-4.1212	0.022706	0.029365	0.453491	1267	2	1.5356
Dhrs13	4	0.032229	0.072658	0.779994	1573	3	-0.38169	0.80088	0.79859	1	15411	0	0
Gng7	4	0.03224	0.072658	0.779994	1574	3	-0.39608	0.29971	0.36841	0.901147	7966	1	0.47075
Slc8a1	4	0.032278	0.072659	0.779994	1575	2	-0.53908	0.89804	0.89338	1	17433	0	0
Tcaf3	4	0.032376	0.073078	0.779994	1576	3	-0.30266	0.99489	0.99501	1	19512	0	0
Fam118a	4	0.032422	0.073078	0.779994	1577	2	-0.57853	0.83995	0.83146	1	16207	0	0
Wdr93	4	0.032428	0.073078	0.779994	1578	2	-0.55572	0.22636	0.26192	0.810039	6296	1	0.65758
Mcm5	2	0.032437	0.053791	0.779994	1579	2	-0.78375	0.96756	0.96959	1	18916	0	0
Nrap	4	0.03247	0.073079	0.779994	1580	3	-0.40073	0.9573	0.96228	1	18687	0	0
Haus4	4	0.032478	0.073079	0.779994	1581	1	-3.0236	0.79209	0.7875	1	15229	0	0
Izumo1	4	0.032513	0.073079	0.779994	1582	3	-0.36555	0.99208	0.99256	1	19458	0	0
Hist1h3a	2	0.032623	0.053792	0.779994	1583	1	-2.4654	0.92023	0.9206	1	17917	0	0
Tgfbr1	4	0.032627	0.073384	0.779994	1584	1	-0.66053	0.58818	0.55896	0.951241	11448	1	0.24295
Sptlc1	4	0.032629	0.073384	0.779994	1585	3	-0.8683	0.2713	0.333	0.88814	7317	1	1.4306
Ell3	4	0.032651	0.073384	0.779994	1586	3	-0.36079	0.96968	0.97266	1	18960	0	0
Tmem186	4	0.032677	0.073384	0.779994	1587	2	-1.0189	0.40688	0.44394	0.94913	9055	1	0.347
Cct5	2	0.032699	0.053792	0.779994	1588	1	-3.6178	0.0080568	0.0074074	0.350913	716	1	2.8351
Olfr1263	4	0.032706	0.073384	0.779994	1589	3	-0.35432	0.95969	0.96494	1	18751	0	0
Slc39a3	4	0.032727	0.073384	0.779994	1590	2	-0.66849	0.54393	0.5408	0.951241	10814	1	0.37101
Fam19a2	4	0.032777	0.073385	0.779994	1591	3	-0.44019	0.54185	0.53753	0.951241	10786	1	0.48016
Rab39b	4	0.032827	0.073385	0.779994	1592	1	-0.7809	0.22805	0.26192	0.810039	6332	1	0.44183
Esd	4	0.032863	0.073385	0.779994	1593	3	-0.63062	0.71053	0.69517	0.998699	13535	1	0.25199
Trim25	4	0.032877	0.073385	0.779994	1594	1	-0.86164	0.81595	0.81509	1	15735	0	0
Alas2	4	0.032879	0.073385	0.779994	1595	2	-0.43989	0.098875	0.1296	0.706918	3519	2	0.36378
Ddi1	3	0.032891	0.058335	0.779994	1596	2	-0.49211	0.91615	0.92558	1	17821	0	0
Olfr1184	4	0.03291	0.0737	0.779994	1597	3	-0.37273	0.9446	0.94862	1	18401	0	0
Eno4	4	0.032927	0.0737	0.779994	1598	2	-0.64726	0.78045	0.77861	1	14988	0	0
Vmn2r110	4	0.03293	0.0737	0.779994	1599	2	-0.4446	0.41643	0.4456	0.94913	9173	1	0.37739
Nmd3	4	0.03294	0.0737	0.779994	1600	2	-1.9507	0.66288	0.63605	0.989773	12641	1	0.55524
Nrn1l	4	0.032943	0.0737	0.779994	1601	3	-0.30315	0.88422	0.88246	1	17125	0	0
Spink2	4	0.032949	0.0737	0.779994	1602	3	-0.479	0.98259	0.98471	1	19254	0	0
Prorsd1	4	0.032977	0.0737	0.779994	1603	3	-0.4508	0.96965	0.97266	1	18959	0	0
Sit1	4	0.032996	0.0737	0.779994	1604	3	-0.40817	0.90584	0.89934	1	17586	0	0
Gpr180	4	0.033034	0.0737	0.779994	1605	3	-0.6857	0.94361	0.94775	1	18381	0	0
Alg14	3	0.033041	0.058335	0.779994	1606	1	-2.9893	0.014857	0.02225	0.44235	992	1	2.7289
Pgrmc2	4	0.033043	0.0737	0.779994	1607	3	-0.37674	0.98913	0.99001	1	19399	0	0
Cysltr2	4	0.033063	0.074038	0.779994	1608	3	-0.50337	0.45792	0.47334	0.951241	9696	1	0.42201
Anks4b	4	0.033073	0.074392	0.779994	1609	2	-0.45163	0.18477	0.20882	0.747354	5392	1	0.5374
Nos1ap	4	0.033077	0.074392	0.779994	1610	2	-0.59476	0.42347	0.45211	0.950867	9262	1	0.43196
Cyp2c37	4	0.033092	0.074392	0.779994	1611	3	-0.4784	0.88946	0.88644	1	17240	0	0
Lrrc26	4	0.033104	0.074392	0.779994	1612	3	-0.44742	0.71722	0.69847	0.998699	13672	1	0.19596
Dnah7b	4	0.033126	0.074392	0.779994	1613	2	-0.72979	0.54182	0.53753	0.951241	10785	1	0.3722
Vmn1r171	4	0.033176	0.074392	0.779994	1614	1	-1.2164	0.95022	0.95564	1	18527	0	0
Nob1	3	0.033229	0.060781	0.779994	1615	1	-1.2602	0.02064	0.029817	0.456181	1200	2	1.21
Kat7	4	0.033276	0.075096	0.779994	1616	2	-1.0768	0.025821	0.033165	0.465683	1378	1	2.5124
Adgrf4	4	0.03329	0.075096	0.779994	1617	3	-0.30866	0.96773	0.971	1	18922	0	0
Bet1l	4	0.033326	0.075096	0.779994	1618	2	-0.48761	0.40549	0.44394	0.94913	9041	1	0.36595
Glp1r	4	0.033331	0.075096	0.779994	1619	3	-0.37297	0.99171	0.99203	1	19444	0	0
1600002K03Rik	4	0.033376	0.075097	0.779994	1620	1	-0.72517	0.071285	0.10211	0.650959	2925	2	0.56313
Pitpnc1	4	0.03338	0.075097	0.779994	1621	2	-0.54526	0.90606	0.89934	1	17592	0	0
Boll	4	0.03339	0.075097	0.779994	1622	2	-0.51723	0.17249	0.20252	0.747354	5118	2	0.49842
B2m	4	0.033398	0.075097	0.779994	1623	3	-0.41575	0.91019	0.90217	1	17697	0	0
Abhd17a	4	0.033426	0.075097	0.779994	1624	1	-0.72326	0.69314	0.66884	0.996627	13201	1	0.24174
Pex14	4	0.033437	0.075097	0.779994	1625	3	-0.60885	0.72966	0.70823	0.998699	13958	0	0
Chd2	4	0.033443	0.075097	0.779994	1626	3	-0.31911	0.9746	0.97877	1	19060	0	0
Sgsm1	4	0.033465	0.075097	0.779994	1627	3	-0.26216	0.78864	0.78249	1	15167	0	0
Tenm1	4	0.033476	0.075097	0.779994	1628	1	-0.61481	0.55655	0.54744	0.951241	10988	1	0.34018
2610028H24Rik	4	0.033526	0.07543	0.779994	1629	2	-0.54237	0.81393	0.81509	1	15688	0	0
Lrrc17	4	0.033544	0.07543	0.779994	1630	2	-0.48558	0.61486	0.57868	0.951241	11863	1	0.26265
Hhipl2	4	0.033576	0.07543	0.779994	1631	1	-0.76441	0.55855	0.54744	0.951241	11024	1	0.35894
Vmn1r95	2	0.033579	0.05442	0.779994	1632	1	-2.6419	0.18646	0.17514	0.745835	5431	1	1.3647
1110059G10Rik	4	0.033596	0.07543	0.779994	1633	3	-0.34272	0.70248	0.68377	0.998699	13366	1	0.21129
Rsrp1	4	0.033616	0.075431	0.779994	1634	3	-0.2925	0.71755	0.69847	0.998699	13678	1	0.24393
Aldob	4	0.033625	0.075431	0.779994	1635	1	-1.1782	0.21797	0.24764	0.793576	6115	1	0.58014
4930524N10Rik	4	0.033637	0.075431	0.779994	1636	2	-0.5712	0.96684	0.97029	1	18903	0	0
Kif18b	4	0.033675	0.075431	0.779994	1637	1	-1.3767	0.039384	0.054546	0.562634	1840	3	0.39551
Unc5a	3	0.033679	0.061141	0.779994	1638	1	-0.69535	0.79504	0.78845	1	15290	0	0
Rit1	4	0.033725	0.075772	0.779994	1639	2	-0.83239	0.90826	0.90148	1	17639	0	0
Dram1	4	0.033833	0.075772	0.779994	1640	2	-0.4144	0.058325	0.084813	0.646696	2544	1	0.91603
Trim52	4	0.033853	0.075772	0.779994	1641	2	-0.56959	0.69672	0.67389	0.998699	13267	1	0.19367
Mtx2	4	0.033875	0.075772	0.779994	1642	2	-0.62449	0.97521	0.97965	1	19079	0	0
Casq1	4	0.033934	0.075772	0.779994	1643	3	-0.35125	0.85978	0.86018	1	16601	0	0
Unc13b	4	0.033975	0.075772	0.779994	1644	1	-0.81255	0.22187	0.25632	0.807584	6199	2	0.32265
Tmem57	4	0.034004	0.075772	0.779994	1645	3	-0.33972	0.51768	0.51782	0.951241	10436	1	0.34356
Ap3m1	4	0.034021	0.075772	0.779994	1646	3	-0.45311	0.18998	0.21506	0.747354	5514	1	0.80126
Cfi	4	0.034074	0.076198	0.779994	1647	1	-0.75714	0.13194	0.1568	0.728596	4223	2	0.35303
Ccdc106	4	0.034075	0.076198	0.779994	1648	3	-1.2657	0.42532	0.45538	0.950867	9285	1	0.37711
AY074887	4	0.034081	0.076198	0.779994	1649	3	-0.5545	0.92488	0.92503	1	18005	0	0
E130311K13Rik	4	0.034143	0.076556	0.779994	1650	2	-0.62895	0.62308	0.58356	0.957023	11999	1	0.25185
Edn3	4	0.034179	0.076556	0.779994	1651	3	-0.3973	0.98276	0.98522	1	19258	0	0
Tbk1	4	0.034224	0.076556	0.779994	1652	2	-0.53037	0.72378	0.70501	0.998699	13822	0	0
4930433I11Rik	4	0.034236	0.076556	0.779994	1653	3	-0.899	0.97139	0.97522	1	18994	0	0
Aqp9	4	0.034274	0.076556	0.779994	1654	2	-0.59127	0.87258	0.87174	1	16860	0	0
Mageb16	4	0.034287	0.076556	0.779994	1655	3	-0.48535	0.25163	0.3072	0.869364	6857	1	0.60727
Brpf3	4	0.034324	0.076556	0.779994	1656	1	-0.46179	0.54097	0.53753	0.951241	10763	1	0.30654
Hsd17b14	4	0.03436	0.076556	0.779994	1657	3	-0.36566	0.93733	0.93887	1	18257	0	0
Speer4b	4	0.034372	0.076556	0.779994	1658	3	-0.54078	0.75072	0.74454	1	14393	0	0
Nid1	4	0.034373	0.076556	0.779994	1659	1	-0.73191	0.87068	0.87088	1	16826	0	0
Myh1	4	0.034413	0.076556	0.779994	1660	2	-0.46561	0.53765	0.53583	0.951241	10711	1	0.29679
Tjp2	4	0.034423	0.076556	0.779994	1661	2	-0.67945	0.97918	0.98215	1	19170	0	0
Irf2bpl	4	0.03444	0.076557	0.779994	1662	3	-0.4401	0.97307	0.97694	1	19030	0	0
Azgp1	4	0.034454	0.076557	0.779994	1663	2	-0.53807	0.096904	0.12885	0.706918	3472	2	0.4796
Hist1h1a	4	0.034508	0.076557	0.779994	1664	3	-0.56706	0.96623	0.97014	1	18891	0	0
Sun3	4	0.034519	0.076557	0.779994	1665	3	-0.426	0.50374	0.51131	0.951241	10254	1	0.38942
Gtf3c5	4	0.034548	0.076557	0.779994	1666	3	-0.91085	0.085424	0.11143	0.666494	3235	1	1.6073
Trim47	4	0.034573	0.076557	0.779994	1667	1	-0.77616	0.69652	0.67389	0.998699	13261	1	0.21172
Mast3	4	0.034594	0.076557	0.779994	1668	3	-0.39194	0.86506	0.86739	1	16714	0	0
Clca4b	4	0.034599	0.076557	0.779994	1669	3	-1.3422	0.57508	0.55733	0.951241	11252	1	0.31603
Atp2a1	4	0.034621	0.076557	0.779994	1670	2	-0.5427	0.30755	0.37169	0.901147	8054	1	0.77055
Ppcs	4	0.034623	0.076557	0.779994	1671	1	-3.1365	0.011896	0.020147	0.439531	876	2	2.2874
Lce1m	4	0.034672	0.076557	0.779994	1672	1	-0.74102	0.64651	0.62123	0.985661	12367	1	0.87762
Cldn1	4	0.034702	0.076557	0.779994	1673	3	-0.44084	0.83332	0.82613	1	16085	0	0
Fam227b	4	0.034722	0.076557	0.779994	1674	1	-0.53604	0.67782	0.65239	0.992077	12909	1	0.30504
Olfr720	4	0.034725	0.076557	0.779994	1675	2	-0.52658	0.88433	0.88246	1	17126	0	0
Hic1	4	0.034746	0.076557	0.779994	1676	2	-0.65165	0.9668	0.97014	1	18901	0	0
Nt5c	4	0.034748	0.076557	0.779994	1677	3	-0.29573	0.82791	0.82178	1	15975	0	0
Uxs1	4	0.03484	0.079608	0.779994	1678	2	-0.79625	0.96755	0.97073	1	18915	0	0
Samm50	4	0.034847	0.079608	0.779994	1679	2	-2.2596	0.83481	0.82935	1	16104	0	0
Erich2	4	0.034847	0.079608	0.779994	1680	1	-4.0585	0.47185	0.48162	0.951241	9862	1	0.34395
Akap7	4	0.034871	0.079608	0.779994	1681	3	-0.37825	0.93206	0.93225	1	18143	0	0
Cck	4	0.034876	0.079609	0.779994	1682	3	-0.34953	0.70279	0.68539	0.998699	13376	1	0.23365
Orc6	2	0.034887	0.055746	0.779994	1683	1	-2.6599	0.36636	0.32642	0.882238	8619	1	0.7796
Fasn	4	0.034922	0.079609	0.779994	1684	1	-1.1139	0.09353	0.12492	0.706918	3412	2	0.48757
Fgf21	4	0.034931	0.079609	0.779994	1685	3	-0.37429	0.96972	0.97266	1	18962	0	0
Cad	4	0.034965	0.079609	0.779994	1686	3	-1.2173	0.57119	0.55567	0.951241	11196	1	0.7569
Hadhb	4	0.034971	0.079609	0.779994	1687	3	-0.48911	0.91184	0.9043	1	17730	0	0
Fbxo43	4	0.034988	0.079949	0.779994	1688	3	-0.34542	0.40895	0.44559	0.94913	9083	1	0.4324
Gm4861	4	0.034997	0.079949	0.779994	1689	2	-0.47147	0.21452	0.23979	0.779233	6047	1	0.44982
Rab24	4	0.035014	0.07995	0.779994	1690	3	-0.31041	0.59932	0.56388	0.951241	11616	1	0.34841
1700056E22Rik	4	0.035021	0.07995	0.779994	1691	1	-0.79313	0.12488	0.15408	0.721856	4072	1	0.68884
Otos	4	0.03504	0.080323	0.779994	1692	3	-0.32201	0.94177	0.94598	1	18332	0	0
Sdhd	4	0.035103	0.080323	0.779994	1693	3	-0.65573	0.35728	0.41594	0.946122	8518	1	0.91061
Serpinc1	4	0.035121	0.080323	0.779994	1694	1	-0.62881	0.58538	0.55733	0.951241	11406	1	0.26616
Cdk4	4	0.035126	0.080323	0.779994	1695	3	-0.28494	0.97081	0.97347	1	18986	0	0
Olfr1193	3	0.035155	0.061514	0.779994	1696	2	-0.4387	0.74882	0.74142	1	14354	0	0
Olfr832	4	0.035163	0.080323	0.779994	1697	3	-0.5472	0.86872	0.86831	1	16786	0	0
Atg2b	4	0.035171	0.080323	0.779994	1698	1	-0.71439	0.67344	0.64914	0.991846	12844	1	0.21843
S100a10	4	0.035175	0.080323	0.779994	1699	3	-0.46857	0.98032	0.98346	1	19201	0	0
Rbp1	4	0.035217	0.080323	0.779994	1700	2	-0.48682	0.78093	0.77861	1	15002	0	0
Gm7903	4	0.035235	0.080323	0.779994	1701	3	-0.27212	0.99019	0.99098	1	19421	0	0
Lhcgr	4	0.035258	0.080323	0.779994	1702	3	-0.26257	0.62539	0.58849	0.961492	12032	1	0.26268
BC049715	4	0.03527	0.080323	0.779994	1703	1	-0.89811	0.56237	0.54744	0.951241	11079	1	0.27098
Gfod1	4	0.03532	0.080323	0.779994	1704	1	-0.75602	0.70848	0.69031	0.998699	13501	1	0.21296
Hmgn2	3	0.035362	0.061514	0.779994	1705	2	-1.5639	0.60937	0.59055	0.964223	11782	1	0.28323
Fosl1	4	0.035369	0.080323	0.779994	1706	2	-0.57527	0.82703	0.8207	1	15959	0	0
Hoxa9	4	0.03537	0.080323	0.779994	1707	2	-0.51921	0.80238	0.80344	1	15435	0	0
Chek1	3	0.035404	0.061514	0.779994	1708	1	-2.9231	0.081343	0.094724	0.650959	3138	1	1.7976
Ugcg	4	0.035432	0.080323	0.779994	1709	3	-0.49165	0.83469	0.82824	1	16102	0	0
Rtn4rl1	4	0.035437	0.080324	0.779994	1710	3	-0.34936	0.98102	0.984	1	19219	0	0
Fblim1	4	0.035438	0.080324	0.779994	1711	2	-0.484	0.97041	0.97321	1	18980	0	0
Dkk3	4	0.035501	0.080324	0.779994	1712	2	-0.53799	0.62556	0.58849	0.961492	12036	1	0.32041
Olfr128	4	0.035519	0.080324	0.779994	1713	2	-0.66411	0.11116	0.13983	0.713923	3775	2	0.95892
Adprh	4	0.035543	0.080324	0.779994	1714	2	-0.49012	0.11114	0.13983	0.713923	3774	2	0.4595
Terf1	3	0.035554	0.061514	0.779994	1715	1	-2.9041	0.097981	0.10785	0.656577	3495	1	1.7125
Gm20747	3	0.035554	0.061514	0.779994	1716	1	-3.8486	0.0038907	0.0093417	0.421203	492	2	2.1037
Btbd1	4	0.035559	0.080324	0.779994	1717	3	-0.481	0.99187	0.99234	1	19450	0	0
Scgb1b3	4	0.035582	0.080324	0.779994	1718	3	-0.61736	0.9813	0.984	1	19225	0	0
Sptlc3	4	0.035585	0.080324	0.779994	1719	2	-0.57752	0.76729	0.75721	1	14735	0	0
Puf60	2	0.035616	0.056417	0.779994	1720	1	-0.71062	0.78409	0.7994	1	15080	0	0
Npy5r	4	0.035619	0.080324	0.779994	1721	1	-0.84023	0.82047	0.81737	1	15826	0	0
Snf8	4	0.035634	0.080324	0.779994	1722	3	-0.71023	0.80354	0.80462	1	15465	0	0
Aco1	4	0.035638	0.080324	0.779994	1723	3	-0.37514	0.15794	0.18317	0.745835	4796	1	0.56361
Gnb4	4	0.035658	0.080324	0.779994	1724	3	-0.36277	0.39531	0.43897	0.94913	8919	1	0.44198
Colq	4	0.035669	0.080324	0.779994	1725	2	-0.66434	0.67755	0.65239	0.992077	12904	1	0.24366
9030617O03Rik	4	0.03568	0.080324	0.779994	1726	2	-0.42157	0.84971	0.8437	1	16393	0	0
2700062C07Rik	3	0.035703	0.061515	0.779994	1727	1	-2.9369	0.37803	0.37384	0.903717	8730	1	0.53446
Agtr1b	4	0.035719	0.080324	0.779994	1728	1	-1.0193	0.080975	0.10536	0.650959	3130	2	0.6412
Pla2r1	4	0.035756	0.080324	0.779994	1729	3	-0.32597	0.9879	0.98893	1	19373	0	0
Mbl2	4	0.035786	0.080324	0.779994	1730	2	-0.48431	0.28696	0.35523	0.897147	7680	2	0.2333
Aqp8	4	0.035818	0.080324	0.779994	1731	2	-0.44879	0.71751	0.69847	0.998699	13676	1	0.17298
Cln5	4	0.035818	0.080324	0.779994	1732	1	-0.81447	0.70093	0.68377	0.998699	13338	1	0.22112
Zfp260	4	0.035844	0.08069	0.779994	1733	3	-0.38767	0.6378	0.61142	0.983032	12232	1	0.27144
Olfr1298	4	0.035849	0.08069	0.779994	1734	3	-0.48458	0.72781	0.70823	0.998699	13915	0	0
Cyp2s1	4	0.035868	0.08069	0.779994	1735	2	-0.58582	0.74783	0.73878	1	14329	0	0
Gcm2	4	0.03589	0.08069	0.779994	1736	3	-0.34342	0.96692	0.97043	1	18904	0	0
Pcsk2	4	0.035896	0.08069	0.779994	1737	3	-0.4058	0.90631	0.90008	1	17597	0	0
Dnajc5b	4	0.035918	0.08069	0.779994	1738	2	-0.71735	0.9561	0.9616	1	18662	0	0
Fam134a	4	0.035937	0.08069	0.779994	1739	3	-0.20959	0.9317	0.93225	1	18136	0	0
Nup214	4	0.035993	0.08069	0.779994	1740	1	-4.0336	0.61924	0.57868	0.951241	11937	1	0.29547
Sipa1	4	0.036067	0.08069	0.779994	1741	1	-0.87272	0.92147	0.92093	1	17948	0	0
Lrrc36	4	0.036115	0.08069	0.779994	1742	3	-0.35331	0.65825	0.63276	0.988026	12562	1	0.23361
Ddx55	3	0.036153	0.061515	0.779994	1743	2	-2.7248	0.21135	0.24768	0.793576	5987	1	1.3885
Prl2c5	4	0.036189	0.081045	0.779994	1744	2	-1.7021	0.69512	0.67389	0.998699	13231	1	0.19912
Lcn11	4	0.036217	0.081045	0.779994	1745	3	-0.62805	0.32185	0.37827	0.903846	8186	1	0.48395
Cox8a	4	0.036223	0.081045	0.779994	1746	3	-0.26946	0.84951	0.8437	1	16385	0	0
Metap1d	4	0.036252	0.081045	0.779994	1747	2	-0.47318	0.71868	0.69847	0.998699	13703	1	0.18265
Zdhhc16	4	0.036266	0.081045	0.779994	1748	1	-1.0593	0.24332	0.29037	0.851164	6676	2	0.33686
Dhrs3	4	0.03627	0.081045	0.779994	1749	3	-0.40287	0.91354	0.90834	1	17766	0	0
Olfr1276	4	0.036282	0.081045	0.779994	1750	3	-0.32447	0.1909	0.21506	0.747354	5533	1	0.59992
Lima1	4	0.036366	0.081045	0.779994	1751	1	-0.95703	0.78643	0.78249	1	15121	0	0
Xrn2	3	0.036378	0.061515	0.779994	1752	1	-2.6237	0.94579	0.9513	1	18425	0	0
Smyd4	4	0.036382	0.081045	0.779994	1753	3	-0.3194	0.90565	0.89934	1	17582	0	0
Cln8	4	0.036452	0.081046	0.779994	1754	3	-0.43513	0.27075	0.33176	0.886438	7304	1	0.52042
Tspan2	4	0.036465	0.081046	0.779994	1755	2	-0.4325	0.70402	0.68707	0.998699	13405	1	0.21064
Gm20809	4	0.036465	0.081046	0.779994	1756	1	-3.0842	0.19273	0.21608	0.747354	5563	1	1.6446
Rpl27	4	0.036465	0.081046	0.779994	1757	2	-2.8188	0.19273	0.21608	0.747354	5559	1	1.6446
Ptpn23	4	0.036523	0.081046	0.779994	1758	3	-0.60752	0.86996	0.87004	1	16813	0	0
Tc2n	4	0.036529	0.081046	0.779994	1759	2	-0.53619	0.48814	0.49318	0.951241	10047	1	0.4078
Nudt17	4	0.036576	0.081046	0.779994	1760	3	-0.27601	0.96345	0.9687	1	18832	0	0
Dab2ip	4	0.036615	0.081453	0.779994	1761	2	-0.71174	0.088626	0.11549	0.678786	3299	1	0.5312
Spink14	4	0.036664	0.081453	0.779994	1762	2	-0.47882	0.83605	0.8304	1	16130	0	0
Gm6696	4	0.036706	0.081453	0.779994	1763	2	-1.2265	0.06462	0.096333	0.650959	2767	1	1.8521
Macrod1	3	0.036735	0.061515	0.779994	1764	2	-0.39657	0.87597	0.8809	1	16935	0	0
Mum1l1	4	0.036747	0.081453	0.779994	1765	3	-0.25555	0.94543	0.94906	1	18418	0	0
Vmn2r16	4	0.036764	0.081453	0.779994	1766	1	-0.631	0.53808	0.53583	0.951241	10720	1	0.30708
Pigf	4	0.036814	0.081453	0.779994	1767	2	-0.50744	0.78475	0.77987	1	15096	0	0
Pdzk1ip1	4	0.036836	0.081453	0.779994	1768	3	-0.3274	0.99053	0.99123	1	19427	0	0
Olfr203	4	0.036913	0.081453	0.779994	1769	2	-0.76645	0.7431	0.72684	1	14236	0	0
Igfals	4	0.036936	0.081453	0.779994	1770	2	-0.46779	0.35334	0.40768	0.938315	8483	1	0.61905
Mapk8ip1	4	0.036961	0.081453	0.779994	1771	3	-0.28815	0.8951	0.89261	1	17362	0	0
Brix1	2	0.036963	0.05709	0.779994	1772	2	-0.79533	0.96304	0.96601	1	18825	0	0
Phip	4	0.036979	0.081453	0.779994	1773	2	-0.41981	0.97249	0.97645	1	19018	0	0
Shank3	4	0.037	0.081453	0.779994	1774	2	-0.46961	0.70303	0.68539	0.998699	13382	1	0.22743
Zbtb46	4	0.037002	0.081453	0.779994	1775	3	-0.75689	0.96974	0.97266	1	18963	0	0
Cyp20a1	4	0.037013	0.081453	0.779994	1776	3	-0.5088	0.98197	0.98435	1	19242	0	0
Olfr301	4	0.037014	0.081453	0.779994	1777	3	-0.46041	0.98899	0.98988	1	19396	0	0
Gabra1	4	0.037022	0.081453	0.779994	1778	2	-0.55094	0.90604	0.89934	1	17590	0	0
Hils1	4	0.037032	0.081453	0.779994	1779	3	-0.32346	0.58294	0.55733	0.951241	11371	1	0.29434
Nip7	3	0.037051	0.061903	0.779994	1780	1	-3.8267	0.058302	0.063881	0.579085	2543	1	2.034
Olfr394	4	0.037063	0.081453	0.779994	1781	1	-0.74031	0.37761	0.43072	0.94913	8725	1	0.39824
Ehbp1	4	0.037064	0.081453	0.779994	1782	2	-0.49219	0.90939	0.90217	1	17672	0	0
Prss46	4	0.037086	0.081453	0.779994	1783	2	-0.60985	0.12278	0.15322	0.721856	4023	2	0.39774
Spata2	4	0.037107	0.081453	0.779994	1784	2	-0.60591	0.40798	0.44559	0.94913	9069	1	0.42324
Fam170b	4	0.037112	0.081453	0.779994	1785	1	-0.87015	0.11311	0.14059	0.713923	3814	2	0.48218
Vmn2r4	4	0.037151	0.081453	0.779994	1786	3	-0.31632	0.4033	0.44231	0.94913	9009	1	0.3614
Gm614	4	0.037157	0.081453	0.779994	1787	3	-0.27068	0.96815	0.97154	1	18931	0	0
Olfr693	4	0.037162	0.081453	0.779994	1788	1	-0.79213	0.28248	0.35091	0.896426	7572	1	0.50028
Pygb	4	0.037212	0.081453	0.779994	1789	1	-0.88333	0.51411	0.51459	0.951241	10391	1	0.32199
Card6	4	0.037222	0.081453	0.779994	1790	3	-0.33653	0.94182	0.94598	1	18334	0	0
Otud1	4	0.037306	0.081453	0.779994	1791	3	-0.28731	0.95148	0.95639	1	18557	0	0
Mrgprf	4	0.037306	0.081453	0.779994	1792	3	-0.47498	0.11259	0.13983	0.713923	3801	1	0.65265
Zbtb40	4	0.037311	0.081453	0.779994	1793	1	-0.70216	0.85865	0.85926	1	16569	0	0
Cul9	4	0.037336	0.081453	0.779994	1794	3	-0.29581	0.70362	0.68707	0.998699	13397	1	0.23713
Ndufaf2	4	0.037361	0.081453	0.779994	1795	2	-0.60635	0.95742	0.96228	1	18690	0	0
Nr2f2	4	0.037384	0.081453	0.779994	1796	3	-0.43561	0.89421	0.89035	1	17344	0	0
Dcaf8	4	0.037411	0.081453	0.779994	1797	1	-0.80941	0.66532	0.64096	0.991846	12690	1	0.2784
Cyct	4	0.03746	0.081453	0.779994	1798	3	-0.48951	0.84422	0.83765	1	16288	0	0
Gsdma3	4	0.037461	0.081453	0.779994	1799	3	-0.32775	0.54017	0.53583	0.951241	10754	1	0.37181
Sbpl	4	0.03751	0.081453	0.779994	1800	2	-0.93974	0.87035	0.87004	1	16822	0	0
Exosc9	4	0.037521	0.081453	0.779994	1801	3	-1.1312	0.62485	0.5852	0.958106	12025	1	0.64362
Olfr561	4	0.037538	0.081453	0.779994	1802	2	-0.50442	0.15981	0.18539	0.745835	4837	1	0.54706
Actrt1	4	0.03756	0.081453	0.779994	1803	1	-0.79478	0.050227	0.069575	0.594487	2249	2	0.5337
Atp6v1g3	4	0.037592	0.081453	0.779994	1804	2	-0.6042	0.65961	0.63276	0.988026	12583	1	0.22564
Ferd3l	4	0.037605	0.081453	0.779994	1805	3	-0.35723	0.025118	0.032849	0.465683	1356	1	2.1093
Tmem167	4	0.03761	0.081453	0.779994	1806	2	-0.77231	0.51667	0.51459	0.951241	10425	1	0.34832
Gm362	4	0.037689	0.081852	0.779994	1807	2	-0.53953	0.63914	0.61633	0.984936	12255	1	0.23819
Aldh5a1	4	0.037709	0.081852	0.779994	1808	2	-0.70676	0.51658	0.51459	0.951241	10423	1	0.34898
Ergic1	4	0.037749	0.082256	0.779994	1809	3	-0.39599	0.94672	0.95118	1	18454	0	0
Pigq	4	0.037759	0.082256	0.779994	1810	2	-0.51646	0.40431	0.44394	0.94913	9024	1	0.42607
Rabggtb	3	0.037762	0.06264	0.779994	1811	2	-2.1991	0.97998	0.98042	1	19194	0	0
Ugt2b34	4	0.037809	0.082256	0.779994	1812	2	-0.73328	0.7264	0.70823	0.998699	13878	0	0
F7	4	0.037815	0.082256	0.779994	1813	3	-0.29734	0.93254	0.93225	1	18152	0	0
Mydgf	4	0.037833	0.082256	0.779994	1814	3	-0.3527	0.50367	0.51131	0.951241	10252	1	0.30866
Il20	4	0.037852	0.082256	0.779994	1815	2	-0.59925	0.9099	0.90217	1	17685	0	0
Urah	4	0.037858	0.082256	0.779994	1816	1	-0.7019	0.23919	0.28495	0.843829	6581	2	0.25805
Rpl23a	1	0.037871	0.02307	0.758534	1817	1	-2.0802	0.96213	0.97693	1	18809	0	0
Ncmap	4	0.037982	0.082692	0.779994	1818	2	-0.45362	0.93862	0.94184	1	18274	0	0
Chmp4c	4	0.037984	0.082692	0.779994	1819	3	-0.29033	0.93678	0.93837	1	18249	0	0
Ispd	4	0.038007	0.082692	0.779994	1820	2	-0.63784	0.93339	0.93387	1	18168	0	0
Ccr2	4	0.038107	0.082692	0.779994	1821	1	-0.67238	0.89965	0.89487	1	17458	0	0
Tyw1	4	0.038141	0.082692	0.779994	1822	3	-0.3635	0.6786	0.65239	0.992077	12919	1	0.18706
Olfr613	4	0.038206	0.083503	0.779994	1823	1	-0.86253	0.91671	0.91228	1	17838	0	0
Vmn1r45	4	0.03822	0.083503	0.779994	1824	3	-0.28262	0.80342	0.80462	1	15461	0	0
1700001F09Rik	2	0.038252	0.059772	0.779994	1825	1	-3.492	0.65743	0.65303	0.992077	12547	0	0
Mettl9	4	0.038302	0.083503	0.779994	1826	3	-0.44622	0.54885	0.54242	0.951241	10877	1	0.3005
Med8	4	0.038306	0.083503	0.779994	1827	2	-2.0309	0.55168	0.54578	0.951241	10914	1	0.63987
Ovch2	4	0.038314	0.083503	0.779994	1828	3	-0.3407	0.97006	0.97321	1	18972	0	0
Bphl	4	0.038352	0.083503	0.779994	1829	2	-0.45129	0.18061	0.20569	0.747354	5308	1	0.52784
Nudt2	4	0.038405	0.083503	0.779994	1830	1	-0.7242	0.47179	0.48162	0.951241	9860	1	0.2737
9330182O14Rik	4	0.03845	0.083503	0.779994	1831	3	-0.41685	0.50045	0.51131	0.951241	10215	1	0.39876
Sult2b1	4	0.038455	0.083503	0.779994	1832	1	-0.9057	0.59305	0.56062	0.951241	11524	1	0.27133
Gucy2f	4	0.038493	0.083503	0.779994	1833	2	-0.522	0.94319	0.9473	1	18368	0	0
Sulf2	4	0.038504	0.083504	0.779994	1834	2	-0.48577	0.45986	0.47501	0.951241	9716	1	0.37204
Olfr403	4	0.038554	0.083504	0.779994	1835	2	-0.66673	0.69734	0.67887	0.998699	13279	1	0.20374
Zc2hc1b	4	0.038569	0.083504	0.779994	1836	3	-0.2758	0.77981	0.77861	1	14973	0	0
Kcnd3	4	0.038581	0.083504	0.779994	1837	2	-0.55226	0.99107	0.99159	1	19432	0	0
Olfr969	4	0.038584	0.083504	0.779994	1838	3	-0.28541	0.24874	0.30284	0.869033	6798	1	0.60177
Tmco1	4	0.0386	0.083504	0.779994	1839	3	-0.46955	0.94906	0.95486	1	18499	0	0
Gsk3a	4	0.038604	0.083504	0.779994	1840	1	-1.101	0.75556	0.75169	1	14498	0	0
Itga11	4	0.038613	0.083504	0.779994	1841	2	-0.49686	0.85949	0.85926	1	16595	0	0
Prrg4	4	0.038624	0.083504	0.779994	1842	2	-0.4542	0.76812	0.75721	1	14746	0	0
Jmjd6	4	0.038645	0.083504	0.779994	1843	3	-0.46688	0.95744	0.96228	1	18691	0	0
Ncbp1	3	0.03866	0.065051	0.779994	1844	2	-1.4877	0.81125	0.80616	1	15631	0	0
Tamm41	4	0.038678	0.083504	0.779994	1845	2	-2.4285	0.026172	0.033486	0.465683	1394	1	1.5613
Atat1	4	0.03869	0.083504	0.779994	1846	2	-0.65648	0.98232	0.98471	1	19248	0	0
Gm5901	4	0.038712	0.083504	0.779994	1847	2	-0.49746	0.68167	0.65724	0.992077	12970	1	0.18269
Hmgn1	4	0.038718	0.083504	0.779994	1848	3	-0.28353	0.92836	0.93011	1	18068	0	0
Mptx2	4	0.038753	0.083504	0.779994	1849	2	-0.64664	0.8619	0.86201	1	16641	0	0
Tnfrsf23	4	0.038778	0.083504	0.779994	1850	2	-0.60585	0.85807	0.85926	1	16558	0	0
Unc5c	4	0.03881	0.083504	0.779994	1851	2	-0.47104	0.2916	0.36055	0.897147	7782	2	0.24795
Ugt1a7c	4	0.038832	0.083504	0.779994	1852	2	-0.66183	0.79115	0.7875	1	15212	0	0
Olr1	4	0.038852	0.083874	0.779994	1853	2	-0.46833	0.42978	0.45538	0.950867	9338	1	0.64694
Anpep	4	0.039001	0.083874	0.779994	1854	1	-1.2963	0.13731	0.17126	0.745835	4335	2	0.32748
Vmn2r59	4	0.039024	0.083874	0.779994	1855	3	-0.32733	0.88905	0.88644	1	17229	0	0
Spg21	4	0.039051	0.083874	0.779994	1856	1	-0.70103	0.42205	0.45211	0.950867	9241	1	0.53703
Hspb8	4	0.039085	0.083874	0.779994	1857	2	-0.55667	0.79476	0.79	1	15289	0	0
Oplah	4	0.039107	0.083874	0.779994	1858	3	-0.36389	0.39961	0.44231	0.94913	8964	1	0.38531
Vmn2r121	4	0.039129	0.083874	0.779994	1859	3	-0.28293	0.73321	0.71611	1	14025	0	0
Zfp36	4	0.03915	0.083874	0.779994	1860	3	-0.57437	0.94169	0.94551	1	18330	0	0
Stt3a	4	0.039151	0.083874	0.779994	1861	2	-0.64631	0.44346	0.46686	0.951241	9510	1	0.40266
Cdc42ep1	4	0.039225	0.083875	0.779994	1862	1	-0.89007	0.95669	0.9616	1	18672	0	0
Ociad1	4	0.03923	0.083875	0.779994	1863	3	-0.38414	0.91895	0.91734	1	17890	0	0
Wdr74	4	0.039252	0.083875	0.779994	1864	3	-1.6155	0.99154	0.99193	1	19442	0	0
Ccdc160	4	0.039283	0.083875	0.779994	1865	2	-0.72697	0.43171	0.45701	0.950867	9364	1	0.404
Olfr250	4	0.03932	0.083875	0.779994	1866	3	-0.37679	0.21148	0.23659	0.774715	5990	1	0.56419
Hsf2	4	0.039349	0.083875	0.779994	1867	2	-0.53359	0.71779	0.69847	0.998699	13685	1	0.15855
Mrpl22	4	0.039349	0.083875	0.779994	1868	2	-0.79496	0.24952	0.30284	0.869033	6810	2	0.66758
Gnmt	4	0.039399	0.083875	0.779994	1869	1	-0.73038	0.28766	0.35523	0.897147	7694	2	0.20342
Crisp4	4	0.039415	0.083875	0.779994	1870	3	-0.42377	0.87315	0.87259	1	16872	0	0
Rps27	3	0.039426	0.066158	0.779994	1871	2	-1.9784	0.85871	0.85921	1	16574	0	0
Dhcr24	4	0.039437	0.083875	0.779994	1872	2	-0.38109	0.84243	0.83765	1	16255	0	0
Piwil2	4	0.039446	0.083875	0.779994	1873	3	-0.37947	0.70667	0.6887	0.998699	13465	1	0.18796
Mybl1	4	0.039448	0.083875	0.779994	1874	2	-0.5163	0.46506	0.47828	0.951241	9778	1	0.30424
Srsf5	4	0.039536	0.084658	0.779994	1875	2	-0.46661	0.97506	0.97944	1	19075	0	0
Nr1d2	4	0.039548	0.084658	0.779994	1876	3	-0.2808	0.95262	0.9587	1	18580	0	0
Prokr1	4	0.039573	0.084658	0.779994	1877	3	-0.54054	0.99471	0.99494	1	19510	0	0
Olfr786	4	0.039636	0.084658	0.779994	1878	2	-0.69407	0.99346	0.9935	1	19492	0	0
Cdkn1c	4	0.039647	0.084658	0.779994	1879	1	-0.908	0.75408	0.74883	1	14460	0	0
Fbxo9	4	0.039658	0.084658	0.779994	1880	2	-0.45176	0.48988	0.49484	0.951241	10075	1	0.37441
Rps6kb1	4	0.03974	0.084658	0.779994	1881	3	-0.54613	0.84482	0.8387	1	16294	0	0
Cd6	4	0.039746	0.084658	0.779994	1882	1	-0.89559	0.65493	0.63111	0.988026	12502	1	0.19288
Lamtor4	4	0.039746	0.084658	0.779994	1883	3	-0.28471	0.43303	0.45701	0.950867	9381	1	0.28973
Prg4	4	0.039796	0.085425	0.779994	1884	2	-0.5992	0.89502	0.89261	1	17358	0	0
Slc16a6	4	0.039824	0.085425	0.779994	1885	2	-0.50561	0.54424	0.5408	0.951241	10821	1	0.33801
Olfr594	4	0.039835	0.085425	0.779994	1886	2	-0.5384	0.087814	0.11478	0.677735	3285	1	0.85881
Vmn2r27	4	0.039846	0.085425	0.779994	1887	3	-0.40154	0.99191	0.99234	1	19453	0	0
Snapc2	4	0.039846	0.085425	0.779994	1888	3	-0.92293	0.71984	0.70011	0.998699	13727	0	0
Ube2v2	4	0.03987	0.085425	0.779994	1889	3	-0.81368	0.82202	0.81737	1	15853	0	0
Ccl1	4	0.039889	0.085425	0.779994	1890	3	-0.32212	0.8899	0.88723	1	17248	0	0
Tas2r114	4	0.03989	0.085425	0.779994	1891	3	-0.39965	0.41568	0.4456	0.94913	9164	1	0.28723
Olfr922	4	0.039895	0.085426	0.779994	1892	1	-0.70501	0.89047	0.88723	1	17264	0	0
Cdc20b	4	0.039951	0.085426	0.779994	1893	3	-0.32324	0.79992	0.79859	1	15390	0	0
Cd163l1	4	0.03999	0.085426	0.779994	1894	2	-0.53789	0.72409	0.7066	0.998699	13829	0	0
Pdhx	4	0.039994	0.085426	0.779994	1895	2	-0.61462	0.5322	0.53097	0.951241	10630	1	0.30706
Abhd17c	4	0.040045	0.085774	0.779994	1896	3	-0.34699	0.98454	0.98715	1	19307	0	0
Slc48a1	4	0.040094	0.085775	0.779994	1897	2	-0.49422	0.15979	0.18539	0.745835	4836	2	0.38733
Dock3	4	0.040107	0.085775	0.779994	1898	3	-0.40312	0.63505	0.60647	0.978755	12188	1	0.31728
Grin2d	4	0.040138	0.085775	0.779994	1899	3	-0.30915	0.90759	0.9008	1	17624	0	0
Ralb	4	0.040176	0.086138	0.779994	1900	3	-0.3197	0.91083	0.90362	1	17708	0	0
Fbll1	4	0.040191	0.086138	0.779994	1901	3	-0.27757	0.72337	0.70336	0.998699	13815	0	0
Sar1a	4	0.040193	0.086138	0.779994	1902	1	-0.65276	0.46759	0.48162	0.951241	9809	1	0.37098
Commd9	4	0.040201	0.086138	0.779994	1903	2	-0.41124	0.76662	0.75721	1	14716	0	0
Olfr248	4	0.040242	0.086138	0.779994	1904	3	-0.3925	0.956	0.9616	1	18660	0	0
Triqk	4	0.040257	0.086138	0.779994	1905	2	-0.59589	0.81994	0.81737	1	15816	0	0
Cstf1	3	0.04029	0.066158	0.779994	1906	2	-2.1038	0.0099844	0.013706	0.421203	799	1	2.9333
Rpl39	3	0.04029	0.066158	0.779994	1907	2	-1.6258	0.087207	0.10082	0.650959	3269	1	1.6494
Prrx2	4	0.040292	0.086138	0.779994	1908	1	-0.74343	0.82251	0.81737	1	15867	0	0
Phlpp2	4	0.040342	0.086138	0.779994	1909	1	-0.71136	0.46426	0.47665	0.951241	9765	1	0.2984
Sssca1	4	0.040391	0.086138	0.779994	1910	1	-0.67984	0.27863	0.34519	0.896426	7488	2	0.36176
Pik3c2g	4	0.040413	0.086138	0.779994	1911	3	-0.31695	0.29157	0.36055	0.897147	7781	1	0.45429
Rpp25l	3	0.040435	0.066541	0.779994	1912	2	-2.0575	0.81369	0.80915	1	15685	0	0
Fam227a	4	0.040441	0.086138	0.779994	1913	2	-0.6465	0.37893	0.43072	0.94913	8736	1	0.4251
S100a9	4	0.040446	0.086138	0.779994	1914	2	-0.57874	0.96185	0.96684	1	18802	0	0
Spag11b	4	0.040491	0.086138	0.779994	1915	1	-0.63841	0.57516	0.55733	0.951241	11253	1	0.29608
Tnfrsf4	4	0.040508	0.086139	0.779994	1916	3	-0.26379	0.87841	0.87429	1	16990	0	0
Krtap9-3	4	0.04052	0.086139	0.779994	1917	3	-0.43896	0.98384	0.98653	1	19289	0	0
Arhgef1	4	0.040526	0.086139	0.779994	1918	3	-0.34141	0.86088	0.86018	1	16623	0	0
Slc35a2	4	0.04059	0.086139	0.779994	1919	1	-2.6758	0.06727	0.097537	0.650959	2826	2	1.297
Pvr	4	0.040624	0.086139	0.779994	1920	2	-0.63911	0.78546	0.78118	1	15108	0	0
Zc3h6	4	0.040636	0.086139	0.779994	1921	2	-0.48094	0.02937	0.036456	0.473088	1491	2	0.7602
Zmat4	4	0.040689	0.086139	0.779994	1922	1	-0.64585	0.84248	0.83765	1	16256	0	0
Plek	4	0.040702	0.086139	0.779994	1923	3	-0.31125	0.9522	0.95678	1	18570	0	0
Stkld1	4	0.040739	0.086139	0.779994	1924	1	-0.80966	0.052396	0.071965	0.595717	2350	3	0.31689
Kdelr1	4	0.040765	0.086139	0.779994	1925	3	-0.3015	0.41005	0.44559	0.94913	9097	1	0.35087
Eef1a1	2	0.040773	0.062647	0.779994	1926	1	-3.4452	0.26979	0.25333	0.806177	7280	1	0.78304
Gm13103	4	0.040778	0.086139	0.779994	1927	3	-0.47533	0.8369	0.83146	1	16146	0	0
1110001J03Rik	4	0.040788	0.086139	0.779994	1928	1	-0.7879	0.089962	0.11689	0.681924	3325	1	0.80801
Ogfr	4	0.040815	0.086139	0.779994	1929	2	-0.51698	0.081361	0.10536	0.650959	3141	2	0.37386
Gbp9	4	0.040838	0.086548	0.779994	1930	1	-1.1286	0.25443	0.30903	0.872746	6915	2	0.32616
Il1a	4	0.04085	0.086548	0.779994	1931	3	-0.32168	0.91762	0.91421	1	17856	0	0
Nkain2	4	0.040871	0.086548	0.779994	1932	2	-0.4735	0.5639	0.54912	0.951241	11102	1	0.31107
Alk	4	0.040893	0.086548	0.779994	1933	2	-0.71556	0.84805	0.84271	1	16355	0	0
Olfr700	4	0.040915	0.086548	0.779994	1934	2	-0.42686	0.76095	0.75443	1	14601	0	0
Rpl3l	4	0.040927	0.086548	0.779994	1935	2	-0.73776	0.14337	0.17641	0.745835	4479	2	0.36344
Psmd13	4	0.040937	0.086548	0.779994	1936	2	-2.0507	0.0039093	0.012521	0.421203	493	1	3.5243
2900092C05Rik	4	0.040943	0.086548	0.779994	1937	2	-0.39306	0.5408	0.53753	0.951241	10761	1	0.2804
Mtap7d3	4	0.040977	0.086548	0.779994	1938	2	-0.59383	0.51584	0.51459	0.951241	10416	1	0.27965
Ankle2	3	0.041032	0.066541	0.779994	1939	1	-3.7404	0.92463	0.93078	1	18001	0	0
Cpsf3	3	0.041032	0.066541	0.779994	1940	2	-1.6881	0.022154	0.030332	0.45941	1250	1	2.5122
Gcc1	4	0.041072	0.086548	0.779994	1941	2	-0.66386	0.88791	0.88644	1	17207	0	0
Lrp2bp	4	0.041084	0.086548	0.779994	1942	2	-0.48993	0.33254	0.38806	0.914344	8295	1	0.44184
Oit1	4	0.041113	0.086548	0.779994	1943	3	-0.33499	0.95955	0.96463	1	18744	0	0
Papl	4	0.041117	0.086548	0.779994	1944	2	-0.46152	0.76789	0.75721	1	14741	0	0
Myom1	4	0.041128	0.086548	0.779994	1945	2	-0.48175	0.45608	0.47173	0.951241	9673	1	0.33831
Rab23	4	0.041138	0.086548	0.779994	1946	3	-0.33586	0.86728	0.86739	1	16757	0	0
Vmn2r107	4	0.041151	0.086548	0.779994	1947	2	-0.53335	0.27703	0.34086	0.891497	7457	2	0.20747
Caskin2	4	0.041201	0.086986	0.779994	1948	3	-0.40152	0.28104	0.34823	0.896426	7545	1	0.55251
Ptgis	4	0.041207	0.086986	0.779994	1949	2	-0.62188	0.83206	0.82393	1	16059	0	0
Yrdc	4	0.041227	0.086986	0.779994	1950	3	-1.7794	0.0048784	0.014449	0.421203	551	1	3.3843
Ly75	4	0.041235	0.086986	0.779994	1951	2	-0.62142	0.64496	0.61959	0.985661	12350	1	0.23005
Zfp747	4	0.0413	0.086986	0.779994	1952	3	-0.3945	0.89317	0.88956	1	17323	0	0
Htr3a	4	0.041363	0.086987	0.779994	1953	3	-0.30147	0.24481	0.29672	0.860276	6716	1	0.51976
Gm5935	4	0.041363	0.086987	0.779994	1954	3	-0.48026	0.12128	0.15322	0.721856	3993	1	1.8435
Hs1bp3	4	0.041392	0.086987	0.779994	1955	3	-0.3986	0.96171	0.96684	1	18800	0	0
Akap6	4	0.041432	0.086987	0.779994	1956	2	-0.47052	0.53788	0.53583	0.951241	10714	1	0.26158
Syngap1	4	0.041449	0.086987	0.779994	1957	3	-0.38107	0.45384	0.47173	0.951241	9644	1	0.33779
Noc4l	2	0.041479	0.063007	0.779994	1958	2	-1.2052	0.95852	0.96137	1	18722	0	0
Rabac1	4	0.041482	0.086987	0.779994	1959	1	-0.96882	0.89667	0.89261	1	17400	0	0
Fut7	4	0.041511	0.086987	0.779994	1960	2	-0.46115	0.89807	0.89338	1	17434	0	0
Bloc1s6	4	0.041522	0.087402	0.779994	1961	3	-0.4074	0.98625	0.98851	1	19343	0	0
Fkbp9	4	0.04157	0.087402	0.779994	1962	3	-0.36192	0.93243	0.93225	1	18147	0	0
Gabrg1	4	0.041582	0.087402	0.779994	1963	1	-0.70784	0.74471	0.72837	1	14261	0	0
Defa21	4	0.041607	0.087402	0.779994	1964	2	-1.4523	0.81614	0.81509	1	15740	0	0
Vmn1r148	4	0.041607	0.087402	0.779994	1965	2	-1.9474	0.088005	0.11478	0.677735	3288	1	1.992
P3h1	4	0.041618	0.087402	0.779994	1966	3	-0.35724	0.95938	0.96431	1	18741	0	0
Gnpda1	4	0.041685	0.087402	0.779994	1967	3	-0.31672	0.98966	0.99051	1	19411	0	0
Glul	4	0.04173	0.087402	0.779994	1968	2	-0.54955	0.27711	0.34086	0.891497	7459	1	0.43435
Gpr83	4	0.041742	0.087402	0.779994	1969	2	-0.57207	0.44996	0.47173	0.951241	9598	1	0.31649
Fbxw16	4	0.041749	0.087402	0.779994	1970	3	-0.43309	0.53356	0.53263	0.951241	10649	1	0.25282
Sqstm1	4	0.04178	0.087402	0.779994	1971	2	-0.59395	0.60697	0.56873	0.951241	11741	1	0.235
Hoxc8	4	0.041805	0.087402	0.779994	1972	2	-0.51308	0.83741	0.83146	1	16154	0	0
Kalrn	4	0.041829	0.0878	0.779994	1973	2	-0.60185	0.23231	0.27186	0.82712	6434	2	0.29571
Ajuba	4	0.041861	0.0878	0.779994	1974	2	-0.5228	0.93605	0.93837	1	18233	0	0
Smad3	4	0.041967	0.0878	0.779994	1975	3	-0.24288	0.9412	0.94506	1	18318	0	0
Gsk3b	4	0.041974	0.0878	0.779994	1976	2	-0.50195	0.79597	0.79244	1	15308	0	0
Slc25a33	4	0.041978	0.0878	0.779994	1977	1	-0.81518	0.63794	0.61142	0.983032	12236	1	0.22769
Zp1	4	0.042008	0.0878	0.779994	1978	2	-0.48721	0.69419	0.67218	0.998699	13217	1	0.20918
Dnajb13	4	0.042012	0.0878	0.779994	1979	3	-0.32994	0.31971	0.37827	0.903846	8170	1	0.48772
Pomt1	4	0.042018	0.0878	0.779994	1980	3	-0.43808	0.9698	0.97266	1	18965	0	0
Calr3	4	0.042028	0.0878	0.779994	1981	1	-1.0742	0.15793	0.18317	0.745835	4795	2	0.51573
Zpr1	3	0.042058	0.066939	0.779994	1982	1	-2.8224	0.15855	0.18429	0.745835	4811	2	0.63927
Vmn2r99	4	0.042089	0.0878	0.779994	1983	3	-0.33979	0.70728	0.6887	0.998699	13475	1	0.18875
Fam132a	4	0.042101	0.0878	0.779994	1984	3	-0.29896	0.84372	0.83765	1	16283	0	0
Olfr877	4	0.042127	0.0878	0.779994	1985	2	-0.41953	0.90305	0.89713	1	17519	0	0
Csn1s2b	4	0.042179	0.0878	0.779994	1986	2	-0.55485	0.76001	0.75443	1	14584	0	0
Tfcp2l1	4	0.042182	0.0878	0.779994	1987	3	-0.28116	0.87853	0.87429	1	16994	0	0
Prl5a1	4	0.04219	0.0878	0.779994	1988	2	-0.46945	0.9274	0.92731	1	18053	0	0
Yap1	4	0.042226	0.0878	0.779994	1989	1	-0.63191	0.85893	0.85926	1	16583	0	0
Ctxn2	4	0.042235	0.0878	0.779994	1990	3	-0.45784	0.2798	0.34823	0.896426	7520	1	0.56051
Znrd1	4	0.042258	0.0878	0.779994	1991	2	-1.1221	0.18155	0.20668	0.747354	5325	2	0.74317
Ppp1r3g	3	0.042269	0.066939	0.779994	1992	2	-1.3795	0.97554	0.97659	1	19083	0	0
Zrsr2	4	0.042275	0.0878	0.779994	1993	2	-0.37686	0.90811	0.90148	1	17634	0	0
Xntrpc	4	0.042325	0.0878	0.779994	1994	1	-0.86492	0.95487	0.9609	1	18637	0	0
Fat1	4	0.042372	0.0878	0.779994	1995	2	-0.505	0.95799	0.96335	1	18707	0	0
Tex36	4	0.042383	0.0878	0.779994	1996	2	-0.46251	0.28546	0.35221	0.897147	7650	2	0.18617
Sprr3	4	0.04244	0.0878	0.779994	1997	2	-0.54945	0.47935	0.48989	0.951241	9947	1	0.33818
Nova2	4	0.042474	0.0878	0.779994	1998	2	-0.47647	0.38507	0.43402	0.94913	8807	1	0.44029
Gga1	4	0.042554	0.0878	0.779994	1999	2	-0.79703	0.63483	0.60647	0.978755	12183	1	0.26405
[truncated: 17,675 more rows]
